# Supplementary material for: Covalently Labeled Fluorescent Exosomes for In Vitro and In Vivo Applications
Source: PubMed Central journal article supplement (PMC7829962; doi:10.3390/biomedicines9010081), 2021-01-16
Supplement: biomedicines-09-00081-s001.pdf [file biomedicines-09-00081-s001.pdf]

# Covalently Labeled Fluorescent Exosomes for In vitro and In vivo Applications

**María Isabel González**<sup>1,2</sup>, **Mario González-Arjona**<sup>1,2</sup>, **Ana Santos-Coquillat**<sup>1,2</sup>, **Javier Vaquero**<sup>3,4</sup>, **Elena Vázquez-Ogando**<sup>3</sup>, **Antonio de Molina**<sup>5</sup>, **Héctor Peinado**<sup>6</sup>, **Manuel Desco**<sup>1,2,7,8,\*</sup> and **Beatriz Salinas**<sup>1,2,7,8\*</sup>

<sup>1</sup> Unidad de Medicina y Cirugía Experimental, Instituto de Investigación Sanitaria Gregorio Marañón (IiSGM), 28007 Madrid, Spain; migonzalez@hggm.es (M.I.G.); mgarjona@hggm.es (M.G-A.); ascoquillat@hggm.es (A.S-C.); bsalinas@hggm.es (B.S.)

<sup>2</sup> Unidad de Imagen Avanzada, Centro Nacional de Investigaciones Cardiovasculares (CNIC), 28029 Madrid, Spain

<sup>3</sup> HepatoGastro Lab, Servicio de Ap. Digestivo del HGU Gregorio Marañón, Instituto de Investigación Sanitaria Gregorio Marañón (IiSGM), 28007 Madrid, Spain; javiervaq@gmail.com (J.V.); elena.vazquez.ogando@hotmail.com (E.V-O.)

<sup>4</sup> Centro de Investigación Biomédica en Red en Enfermedades Hepáticas y Digestivas (CIBEREHD), 28029 Madrid, Spain

<sup>5</sup> Comparative Medicine Unit, Centro Nacional de Investigaciones Cardiovasculares (CNIC), 28029 Madrid, Spain; ademolina@cnic.es (A.M.)

<sup>6</sup> Microenvironment and Metastasis Laboratory, Department of Molecular Oncology, Spanish National Cancer Research Center (CNIO), 28029, Madrid Spain; hpeinado@cnio.es (H.P.)

<sup>7</sup> Departamento de Bioingeniería e Ingeniería Aeroespacial, Universidad Carlos III de Madrid, 28911 Madrid, Spain

<sup>8</sup> Centro de Investigación Biomédica en Red de Salud Mental (CIBERSAM), 28029 Madrid, Spain

\* Correspondence: desco@hggm.es (M.D.); bsalinas@hggm.es (B.S.)

For ensuring and maintaining the transparency and reproducibility of the results recorded, authors have provided the following research data, openly available as supplementary information:

**Supplementary Table 1:** Experimental data from Figure 1C. Physicochemical characterization of control and fluorescently labeled milk exosomes: Size distributions established with DLS.

| Particle size (nm) | 1 Control exo. (intensity, a.u.) | 2 Control exo. (intensity, a.u.) | 3 Control exo. (intensity, a.u.) | 1 SCy-MiExo (intensity, a.u.) | 2 SCy-MiExo (intensity, a.u.) | 3 SCy-MiExo (intensity, a.u.) | 1 BDP-MiExo (intensity, a.u.) | 2 BDP-MiExo (intensity, a.u.) | 3 BDP-MiExo (intensity, a.u.) |
|--------------------|----------------------------------|----------------------------------|----------------------------------|-------------------------------|-------------------------------|-------------------------------|-------------------------------|-------------------------------|-------------------------------|
| 0.4                | 0                                | 0                                | 0                                | 0                             | 0                             | 0                             | 0                             | 0                             | 0                             |
| 0.463              | 0                                | 0                                | 0                                | 0                             | 0                             | 0                             | 0                             | 0                             | 0                             |
| 0.536              | 0                                | 0                                | 0                                | 0                             | 0                             | 0                             | 0                             | 0                             | 0                             |
| 0.621              | 0                                | 0                                | 0                                | 0                             | 0                             | 0                             | 0                             | 0                             | 0                             |
| 0.719              | 0                                | 0                                | 0                                | 0                             | 0                             | 0                             | 0                             | 0                             | 0                             |
| 0.833              | 0                                | 0                                | 0                                | 0                             | 0                             | 0                             | 0                             | 0                             | 0                             |
| 0.965              | 0                                | 0                                | 0                                | 0                             | 0                             | 0                             | 0                             | 0                             | 0                             |
| 1.12               | 0                                | 0                                | 0                                | 0                             | 0                             | 0                             | 0                             | 0                             | 0                             |
| 1.29               | 0                                | 0                                | 0                                | 0                             | 0                             | 0                             | 0                             | 0                             | 0                             |
| 1.5                | 0                                | 0                                | 0                                | 0                             | 0                             | 0                             | 0                             | 0                             | 0                             |
| 1.74               | 0                                | 0                                | 0                                | 0                             | 0                             | 0                             | 0                             | 0                             | 0                             |
| 2.01               | 0                                | 0                                | 0                                | 0                             | 0                             | 0                             | 0                             | 0                             | 0                             |
| 2.33               | 0                                | 0                                | 0                                | 0                             | 0                             | 0                             | 0                             | 0                             | 0                             |
| 2.7                | 0                                | 0                                | 0                                | 0                             | 0                             | 0                             | 0                             | 0                             | 0                             |
| 3.12               | 0                                | 0                                | 0                                | 0                             | 0                             | 0                             | 0                             | 0                             | 0                             |
| 3.62               | 0                                | 0                                | 0                                | 0                             | 0                             | 0                             | 0                             | 0                             | 0                             |
| 4.19               | 0                                | 0                                | 0                                | 0                             | 0                             | 0                             | 0                             | 0                             | 0                             |
| 4.85               | 0                                | 0                                | 0                                | 0                             | 0                             | 0                             | 0                             | 0                             | 0                             |
| 5.61               | 0                                | 0                                | 0                                | 0                             | 0                             | 0                             | 0                             | 0                             | 0                             |
| 6.5                | 0                                | 0                                | 0                                | 0                             | 0                             | 0                             | 0                             | 0                             | 0                             |
| 7.53               | 0                                | 0                                | 0                                | 0                             | 0                             | 0                             | 0                             | 0                             | 0                             |
| 8.72               | 0                                | 0                                | 0                                | 0                             | 0                             | 0                             | 0                             | 0                             | 0                             |
| 10.1               | 0                                | 0                                | 0                                | 0                             | 0                             | 0                             | 0                             | 0                             | 0                             |
| 11.7               | 0                                | 0                                | 0                                | 0                             | 0                             | 0                             | 0                             | 0                             | 0                             |
| 13.545             | 0                                | 0                                | 0                                | 0                             | 0                             | 0                             | 0                             | 0                             | 0                             |
| 15.686             | 0                                | 0                                | 0                                | 0                             | 0                             | 0                             | 0                             | 0                             | 0                             |
| 18.166             | 0                                | 0                                | 0                                | 0                             | 0                             | 0                             | 0.005728814                   | 0                             | 0                             |
| 21.037             | 0.013554217                      | 0                                | 0                                | 0                             | 0                             | 0                             | 0.016271186                   | 0                             | 0                             |
| 24.363             | 0.028012048                      | 0                                | 0                                | 0                             | 0                             | 0                             | 0.021864407                   | 0                             | 0                             |
| 28.214             | 0.02876506                       | 0                                | 0                                | 0                             | 0                             | 0                             | 0.020847458                   | 0                             | 0                             |
| 32.674             | 0.017243976                      | 0                                | 0                                | 0                             | 0                             | 0                             | 0.022372881                   | 0                             | 0                             |
| 37.84              | 0.011295181                      | 0.010268698                      | 0                                | 0.013365385                   | 0.009298969                   | 0                             | 0.04220339                    | 0.025877193                   | 0.029224138                   |
| 43.821             | 0.035768072                      | 0.074276913                      | 0.032208589                      | 0.0575                        | 0.052268041                   | 0.026902655                   | 0.095762712                   | 0.106140351                   | 0.106896552                   |
| 50.748             | 0.110466867                      | 0.200667465                      | 0.120168712                      | 0.140384615                   | 0.13814433                    | 0.09380531                    | 0.192372881                   | 0.24122807                    | 0.234482759                   |
| 58.771             | 0.242093373                      | 0.374636317                      | 0.265644172                      | 0.260576923                   | 0.262886598                   | 0.203539823                   | 0.329661017                   | 0.415789474                   | 0.400862069                   |
| 68.061             | 0.420331325                      | 0.568714701                      | 0.452147239                      | 0.408653846                   | 0.41443299                    | 0.350442478                   | 0.496610169                   | 0.603508772                   | 0.58362069                    |

|          |             |             |             |             |             |             |             |             |             |
|----------|-------------|-------------|-------------|-------------|-------------|-------------|-------------|-------------|-------------|
| 78.82    | 0.619503012 | 0.751754236 | 0.650843558 | 0.570192308 | 0.577319588 | 0.519469027 | 0.672033898 | 0.776315789 | 0.756034483 |
| 91.28    | 0.805045181 | 0.896286154 | 0.82791411  | 0.725961538 | 0.730927835 | 0.690265487 | 0.829661017 | 0.912280702 | 0.896551724 |
| 105.709  | 0.94126506  | 0.982286497 | 0.951840491 | 0.859615385 | 0.860824742 | 0.840707965 | 0.949152542 | 0.99122807  | 0.982758621 |
| 122.42   | 1           | 1           | 1           | 0.954807692 | 0.953608247 | 0.946902655 | 1           | 1           | 1           |
| 141.772  | 0.967243976 | 0.950111244 | 0.962960123 | 1           | 1           | 1           | 0.974576271 | 0.947368421 | 0.948275862 |
| 164.183  | 0.846762048 | 0.842204347 | 0.846625767 | 0.990384615 | 0.998969072 | 0.991150442 | 0.889830508 | 0.837719298 | 0.84137931  |
| 190.137  | 0.660240964 | 0.693051515 | 0.671165644 | 0.926923077 | 0.950515464 | 0.911504425 | 0.737288136 | 0.69122807  | 0.690517241 |
| 220.194  | 0.443674699 | 0.523446859 | 0.467714724 | 0.817307692 | 0.86185567  | 0.782300885 | 0.551694915 | 0.524561404 | 0.51637931  |
| 255.002  | 0.239909639 | 0.355211364 | 0.272392638 | 0.674038462 | 0.742268041 | 0.615929204 | 0.359322034 | 0.35877193  | 0.343103448 |
| 295.312  | 0.088027108 | 0.208112271 | 0.118788344 | 0.513461538 | 0.604123711 | 0.43539823  | 0.190677966 | 0.213157895 | 0.193103448 |
| 341.995  | 0.010918675 | 0.096868047 | 0.028220859 | 0.353846154 | 0.459793814 | 0.266371681 | 0.070932203 | 0.102631579 | 0.083275862 |
| 396.058  | 0           | 0.028495636 | 0           | 0.211538462 | 0.322680412 | 0.12920354  | 0.010508475 | 0.03254386  | 0.020517241 |
| 458.666  | 0           | 0.000770152 | 0           | 0.101923077 | 0.203092784 | 0.040265487 | 0           | 0.002666667 | 0           |
| 531.172  | 0           | 0           | 0           | 0.032211538 | 0.109278351 | 0.001681416 | 0           | 0           | 0           |
| 615.139  | 0           | 0           | 0           | 0.002192308 | 0.045360825 | 0           | 0           | 0           | 0           |
| 712.379  | 0           | 0           | 0           | 0           | 0.010927835 | 0           | 0           | 0           | 0           |
| 824.992  | 0           | 0           | 0           | 0           | 0           | 0           | 0           | 0           | 0           |
| 955.406  | 0           | 0           | 0           | 0           | 0           | 0           | 0           | 0           | 0           |
| 1106.435 | 0           | 0           | 0           | 0           | 0           | 0           | 0           | 0           | 0           |
| 1281.34  | 0           | 0           | 0           | 0           | 0           | 0           | 0           | 0           | 0           |
| 1483.893 | 0           | 0           | 0           | 0           | 0           | 0           | 0           | 0           | 0           |
| 1718.466 | 0           | 0           | 0           | 0           | 0           | 0           | 0           | 0           | 0           |
| 1990.119 | 0           | 0           | 0           | 0           | 0           | 0           | 0           | 0           | 0           |
| 2304.716 | 0           | 0           | 0           | 0           | 0           | 0           | 0           | 0           | 0           |
| 2669.043 | 0           | 0           | 0           | 0           | 0           | 0           | 0           | 0           | 0           |
| 3090.964 | 0           | 0           | 0           | 0           | 0           | 0           | 0           | 0           | 0           |

**Supplementary Table 2:** Experimental data from Figure 2B. Physicochemical characterization of control and fluorescently labeled cancer cell line-derived exosomes: Size distributions established with DLS.

| Particle size (nm) | 1 Control U87 exo. (intensity, a.u.) | 2 Control U87 exo. (intensity, a.u.) | 1 SCy-U87Exo (intensity, a.u.) | 2 SCy-U87Exo (intensity, a.u.) | 3 SCy-U87Exo (intensity, a.u.) | 1Control B16F10 exo. (intensity, a.u.) | 2 Control B16F10 exo. (intensity, a.u.) | 1 SCy-B16F10Exo (intensity, a.u.) | 2 SCy-B16F10Exo (intensity, a.u.) | 3 SCy-B16F10Exo (intensity, a.u.) |
|--------------------|--------------------------------------|--------------------------------------|--------------------------------|--------------------------------|--------------------------------|----------------------------------------|-----------------------------------------|-----------------------------------|-----------------------------------|-----------------------------------|
| 0.4                | 0.00                                 | 0.00                                 | 0.00                           | 0.00                           | 0.00                           | 0.00                                   | 0.00                                    | 0.00                              | 0.00                              | 0.00                              |
| 0.463              | 0.00                                 | 0.00                                 | 0.00                           | 0.00                           | 0.00                           | 0.00                                   | 0.00                                    | 0.00                              | 0.00                              | 0.00                              |
| 0.536              | 0.00                                 | 0.00                                 | 0.00                           | 0.00                           | 0.00                           | 0.00                                   | 0.00                                    | 0.00                              | 0.00                              | 0.00                              |
| 0.621              | 0.00                                 | 0.00                                 | 0.00                           | 0.00                           | 0.00                           | 0.00                                   | 0.00                                    | 0.00                              | 0.00                              | 0.00                              |
| 0.719              | 0.00                                 | 0.00                                 | 0.00                           | 0.00                           | 0.00                           | 0.00                                   | 0.00                                    | 0.00                              | 0.00                              | 0.00                              |
| 0.833              | 0.00                                 | 0.00                                 | 0.00                           | 0.00                           | 0.00                           | 0.00                                   | 0.00                                    | 0.00                              | 0.00                              | 0.00                              |
| 0.965              | 0.00                                 | 0.00                                 | 0.00                           | 0.00                           | 0.00                           | 0.00                                   | 0.00                                    | 0.00                              | 0.00                              | 0.00                              |

|         |      |      |      |      |      |      |      |      |      |      |
|---------|------|------|------|------|------|------|------|------|------|------|
| 1.117   | 0.00 | 0.00 | 0.00 | 0.00 | 0.00 | 0.00 | 0.00 | 0.00 | 0.00 | 0.00 |
| 1.294   | 0.00 | 0.00 | 0.00 | 0.00 | 0.00 | 0.00 | 0.00 | 0.00 | 0.00 | 0.00 |
| 1.499   | 0.00 | 0.00 | 0.00 | 0.00 | 0.00 | 0.00 | 0.00 | 0.00 | 0.00 | 0.00 |
| 1.736   | 0.00 | 0.00 | 0.00 | 0.00 | 0.00 | 0.00 | 0.00 | 0.00 | 0.00 | 0.00 |
| 2.01    | 0.00 | 0.00 | 0.00 | 0.00 | 0.00 | 0.00 | 0.00 | 0.00 | 0.00 | 0.00 |
| 2.328   | 0.00 | 0.00 | 0.00 | 0.00 | 0.00 | 0.00 | 0.00 | 0.00 | 0.00 | 0.00 |
| 2.696   | 0.00 | 0.00 | 0.00 | 0.00 | 0.00 | 0.00 | 0.00 | 0.00 | 0.00 | 0.00 |
| 3.122   | 0.00 | 0.00 | 0.00 | 0.00 | 0.00 | 0.00 | 0.00 | 0.00 | 0.00 | 0.00 |
| 3.615   | 0.00 | 0.00 | 0.00 | 0.00 | 0.00 | 0.00 | 0.00 | 0.00 | 0.00 | 0.00 |
| 4.187   | 0.00 | 0.00 | 0.00 | 0.00 | 0.00 | 0.00 | 0.00 | 0.00 | 0.00 | 0.00 |
| 4.849   | 0.00 | 0.00 | 0.00 | 0.00 | 0.00 | 0.00 | 0.00 | 0.00 | 0.00 | 0.00 |
| 5.615   | 0.00 | 0.00 | 0.00 | 0.00 | 0.00 | 0.00 | 0.00 | 0.00 | 0.00 | 0.00 |
| 6.503   | 0.00 | 0.00 | 0.00 | 0.00 | 0.00 | 0.00 | 0.00 | 0.00 | 0.00 | 0.00 |
| 7.531   | 0.00 | 0.00 | 0.00 | 0.00 | 0.00 | 0.00 | 0.00 | 0.00 | 0.00 | 0.00 |
| 8.721   | 0.00 | 0.00 | 0.00 | 0.00 | 0.00 | 0.00 | 0.00 | 0.00 | 0.00 | 0.00 |
| 10.1    | 0.00 | 0.00 | 0.00 | 0.00 | 0.00 | 0.00 | 0.00 | 0.00 | 0.00 | 0.00 |
| 11.696  | 0.00 | 0.00 | 0.00 | 0.00 | 0.00 | 0.00 | 0.00 | 0.00 | 0.00 | 0.00 |
| 13.545  | 0.00 | 0.00 | 0.00 | 0.00 | 0.00 | 0.00 | 0.00 | 0.00 | 0.00 | 0.00 |
| 15.686  | 0.01 | 0.02 | 0.00 | 0.00 | 0.00 | 0.00 | 0.00 | 0.00 | 0.00 | 0.00 |
| 18.166  | 0.04 | 0.06 | 0.00 | 0.00 | 0.00 | 0.01 | 0.00 | 0.00 | 0.00 | 0.00 |
| 21.037  | 0.09 | 0.09 | 0.00 | 0.00 | 0.00 | 0.03 | 0.00 | 0.00 | 0.00 | 0.00 |
| 24.363  | 0.14 | 0.10 | 0.00 | 0.00 | 0.00 | 0.06 | 0.01 | 0.01 | 0.00 | 0.00 |
| 28.214  | 0.18 | 0.10 | 0.00 | 0.00 | 0.00 | 0.06 | 0.03 | 0.04 | 0.00 | 0.01 |
| 32.674  | 0.22 | 0.12 | 0.00 | 0.00 | 0.00 | 0.05 | 0.06 | 0.09 | 0.00 | 0.05 |
| 37.84   | 0.25 | 0.16 | 0.00 | 0.00 | 0.03 | 0.03 | 0.10 | 0.18 | 0.00 | 0.11 |
| 43.821  | 0.29 | 0.24 | 0.04 | 0.03 | 0.10 | 0.02 | 0.14 | 0.28 | 0.04 | 0.21 |
| 50.748  | 0.35 | 0.35 | 0.13 | 0.12 | 0.20 | 0.05 | 0.19 | 0.39 | 0.14 | 0.32 |
| 58.771  | 0.42 | 0.49 | 0.27 | 0.27 | 0.34 | 0.13 | 0.26 | 0.51 | 0.28 | 0.45 |
| 68.061  | 0.51 | 0.64 | 0.45 | 0.46 | 0.50 | 0.25 | 0.35 | 0.63 | 0.45 | 0.59 |
| 78.82   | 0.62 | 0.78 | 0.62 | 0.65 | 0.65 | 0.41 | 0.46 | 0.74 | 0.62 | 0.71 |
| 91.28   | 0.74 | 0.90 | 0.78 | 0.82 | 0.79 | 0.59 | 0.59 | 0.84 | 0.78 | 0.82 |
| 105.709 | 0.85 | 0.97 | 0.91 | 0.94 | 0.90 | 0.76 | 0.72 | 0.92 | 0.90 | 0.91 |
| 122.42  | 0.94 | 1.00 | 0.98 | 1.00 | 0.97 | 0.90 | 0.84 | 0.97 | 0.98 | 0.97 |
| 141.772 | 0.99 | 0.98 | 1.00 | 1.00 | 1.00 | 0.98 | 0.94 | 1.00 | 1.00 | 1.00 |
| 164.183 | 1.00 | 0.91 | 0.97 | 0.94 | 0.98 | 1.00 | 0.99 | 1.00 | 0.97 | 0.99 |
| 190.137 | 0.96 | 0.81 | 0.88 | 0.83 | 0.92 | 0.95 | 1.00 | 0.97 | 0.90 | 0.96 |
| 220.194 | 0.87 | 0.68 | 0.76 | 0.69 | 0.83 | 0.84 | 0.95 | 0.92 | 0.80 | 0.89 |
| 255.002 | 0.74 | 0.54 | 0.62 | 0.53 | 0.71 | 0.69 | 0.85 | 0.84 | 0.67 | 0.80 |
| 295.312 | 0.58 | 0.40 | 0.47 | 0.38 | 0.57 | 0.52 | 0.72 | 0.74 | 0.53 | 0.69 |
| 341.995 | 0.42 | 0.27 | 0.32 | 0.24 | 0.43 | 0.34 | 0.55 | 0.64 | 0.39 | 0.57 |
| 396.058 | 0.26 | 0.16 | 0.20 | 0.13 | 0.30 | 0.19 | 0.39 | 0.52 | 0.26 | 0.45 |

|          |      |      |      |      |      |      |      |      |      |      |
|----------|------|------|------|------|------|------|------|------|------|------|
| 458.666  | 0.14 | 0.08 | 0.10 | 0.05 | 0.18 | 0.08 | 0.24 | 0.41 | 0.16 | 0.33 |
| 531.172  | 0.05 | 0.03 | 0.04 | 0.01 | 0.10 | 0.02 | 0.12 | 0.30 | 0.08 | 0.23 |
| 615.139  | 0.01 | 0.00 | 0.01 | 0.00 | 0.04 | 0.00 | 0.04 | 0.21 | 0.03 | 0.14 |
| 712.379  | 0.00 | 0.00 | 0.00 | 0.00 | 0.01 | 0.00 | 0.01 | 0.13 | 0.01 | 0.07 |
| 824.992  | 0.00 | 0.00 | 0.00 | 0.00 | 0.00 | 0.00 | 0.00 | 0.07 | 0.00 | 0.03 |
| 955.406  | 0.00 | 0.00 | 0.00 | 0.00 | 0.00 | 0.00 | 0.00 | 0.03 | 0.00 | 0.01 |
| 1106.435 | 0.00 | 0.00 | 0.00 | 0.00 | 0.00 | 0.00 | 0.00 | 0.01 | 0.00 | 0.00 |
| 1281.34  | 0.00 | 0.00 | 0.00 | 0.00 | 0.00 | 0.00 | 0.00 | 0.00 | 0.00 | 0.00 |
| 1483.893 | 0.00 | 0.00 | 0.00 | 0.00 | 0.00 | 0.00 | 0.00 | 0.00 | 0.00 | 0.00 |
| 1718.466 | 0.00 | 0.00 | 0.00 | 0.00 | 0.00 | 0.00 | 0.00 | 0.00 | 0.00 | 0.00 |
| 1990.119 | 0.00 | 0.00 | 0.00 | 0.00 | 0.00 | 0.00 | 0.00 | 0.00 | 0.00 | 0.00 |
| 2304.716 | 0.00 | 0.00 | 0.00 | 0.00 | 0.00 | 0.00 | 0.00 | 0.00 | 0.00 | 0.00 |
| 2669.043 | 0.00 | 0.01 | 0.00 | 0.00 | 0.00 | 0.00 | 0.00 | 0.00 | 0.00 | 0.00 |
| 3090.964 | 0.00 | 0.02 | 0.00 | 0.00 | 0.00 | 0.00 | 0.00 | 0.00 | 0.00 | 0.00 |

**Supplementary Table 3:** Experimental data from Figure 3. In vitro stability of BDP-MiExo evaluated by HPLC.

| <b>Time</b><br>(min) | <b>BDP-MiExo t = 0h</b><br>(Intensity, normalized) | <b>BDP-MiExo t = 12h</b><br>(Intensity, normalized) | <b>BDP-MiExo t = 48h</b><br>(Intensity, normalized) | <b>BDP-MiExo t = 72h</b><br>(Intensity, normalized) | <b>Control exo.</b><br>(Intensity, normalized) | <b>free BDP</b><br>(Intensity, normalized) |
|----------------------|----------------------------------------------------|-----------------------------------------------------|-----------------------------------------------------|-----------------------------------------------------|------------------------------------------------|--------------------------------------------|
| 0.00                 | 0.00                                               | 0.00                                                | -0.33                                               | 0.26                                                | 0.00                                           | 0.00                                       |
| 0.02                 | 0.00                                               | 0.00                                                | -0.33                                               | 0.26                                                | 0.00                                           | 0.00                                       |
| 0.03                 | 0.00                                               | -0.06                                               | -0.01                                               | 0.16                                                | 0.01                                           | 0.00                                       |
| 0.05                 | 0.09                                               | 0.00                                                | 0.00                                                | 0.00                                                | 0.01                                           | 0.00                                       |
| 0.07                 | 0.14                                               | 0.00                                                | 0.00                                                | 0.00                                                | 0.02                                           | -0.01                                      |
| 0.08                 | 0.05                                               | -0.01                                               | 0.00                                                | 0.01                                                | 0.02                                           | -0.05                                      |
| 0.10                 | -0.02                                              | 0.00                                                | 0.00                                                | 0.00                                                | 0.01                                           | -0.09                                      |
| 0.12                 | -0.02                                              | 0.00                                                | 0.01                                                | 0.01                                                | 0.01                                           | -0.10                                      |
| 0.13                 | -0.09                                              | 0.01                                                | 0.01                                                | -0.01                                               | 0.02                                           | -0.10                                      |
| 0.15                 | -0.11                                              | 0.01                                                | 0.01                                                | -0.01                                               | 0.02                                           | -0.10                                      |
| 0.17                 | -0.02                                              | 0.01                                                | 0.01                                                | -0.01                                               | 0.02                                           | -0.12                                      |
| 0.18                 | 0.06                                               | 0.01                                                | 0.01                                                | -0.01                                               | 0.02                                           | -0.13                                      |
| 0.20                 | 0.15                                               | 0.02                                                | 0.01                                                | -0.01                                               | 0.02                                           | -0.13                                      |
| 0.22                 | 0.22                                               | 0.02                                                | 0.01                                                | -0.01                                               | 0.02                                           | -0.13                                      |
| 0.23                 | 0.17                                               | 0.02                                                | 0.02                                                | -0.01                                               | 0.02                                           | -0.14                                      |
| 0.25                 | 0.03                                               | 0.03                                                | 0.02                                                | -0.01                                               | 0.02                                           | -0.14                                      |
| 0.27                 | -0.03                                              | 0.03                                                | 0.02                                                | -0.01                                               | 0.02                                           | -0.15                                      |
| 0.28                 | -0.03                                              | 0.04                                                | 0.02                                                | -0.02                                               | 0.02                                           | -0.16                                      |
| 0.30                 | -0.05                                              | 0.04                                                | 0.02                                                | -0.02                                               | 0.02                                           | -0.17                                      |
| 0.32                 | 0.00                                               | 0.05                                                | 0.01                                                | -0.03                                               | 0.02                                           | -0.18                                      |
| 0.33                 | 0.05                                               | 0.05                                                | 0.02                                                | -0.03                                               | 0.02                                           | -0.18                                      |
| 0.35                 | 0.14                                               | 0.06                                                | 0.02                                                | -0.03                                               | 0.02                                           | -0.19                                      |
| 0.37                 | 0.28                                               | 0.06                                                | 0.03                                                | -0.03                                               | 0.02                                           | -0.19                                      |
| 0.38                 | 0.26                                               | 0.07                                                | 0.03                                                | -0.04                                               | 0.02                                           | -0.20                                      |
| 0.40                 | 0.22                                               | 0.07                                                | 0.03                                                | -0.03                                               | 0.02                                           | -0.20                                      |
| 0.42                 | 0.26                                               | 0.08                                                | 0.04                                                | -0.03                                               | 0.02                                           | -0.20                                      |
| 0.43                 | 0.29                                               | 0.08                                                | 0.06                                                | -0.04                                               | 0.02                                           | -0.20                                      |
| 0.45                 | 0.34                                               | 0.08                                                | 0.09                                                | -0.04                                               | 0.02                                           | -0.20                                      |
| 0.47                 | 0.37                                               | 0.09                                                | 0.13                                                | -0.04                                               | 0.02                                           | -0.21                                      |
| 0.48                 | 0.45                                               | 0.10                                                | 0.17                                                | -0.04                                               | 0.02                                           | -0.21                                      |
| 0.50                 | 0.57                                               | 0.10                                                | 0.20                                                | -0.04                                               | 0.02                                           | -0.21                                      |
| 0.52                 | 0.66                                               | 0.11                                                | 0.22                                                | -0.05                                               | 0.02                                           | -0.23                                      |
| 0.53                 | 0.71                                               | 0.11                                                | 0.24                                                | -0.05                                               | 0.02                                           | -0.24                                      |
| 0.55                 | 0.70                                               | 0.12                                                | 0.24                                                | -0.05                                               | 0.03                                           | -0.25                                      |

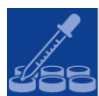

|      |      |      |      |       |      |       |
|------|------|------|------|-------|------|-------|
| 0.57 | 0.68 | 0.13 | 0.24 | -0.05 | 0.03 | -0.26 |
| 0.58 | 0.59 | 0.14 | 0.25 | -0.05 | 0.03 | -0.26 |
| 0.60 | 0.48 | 0.14 | 0.25 | -0.05 | 0.03 | -0.26 |
| 0.62 | 0.46 | 0.15 | 0.25 | -0.05 | 0.03 | -0.27 |
| 0.63 | 0.45 | 0.16 | 0.26 | -0.04 | 0.03 | -0.27 |
| 0.65 | 0.53 | 0.16 | 0.26 | -0.04 | 0.03 | -0.27 |
| 0.67 | 0.63 | 0.17 | 0.27 | -0.04 | 0.03 | -0.28 |
| 0.68 | 0.60 | 0.18 | 0.28 | -0.03 | 0.03 | -0.28 |
| 0.70 | 0.51 | 0.18 | 0.30 | -0.03 | 0.03 | -0.29 |
| 0.72 | 0.59 | 0.19 | 0.32 | -0.03 | 0.03 | -0.29 |
| 0.73 | 0.70 | 0.19 | 0.34 | -0.02 | 0.03 | -0.30 |
| 0.75 | 0.68 | 0.20 | 0.37 | -0.02 | 0.03 | -0.30 |
| 0.77 | 0.66 | 0.21 | 0.41 | -0.01 | 0.03 | -0.31 |
| 0.78 | 0.73 | 0.22 | 0.45 | -0.01 | 0.03 | -0.32 |
| 0.80 | 0.71 | 0.22 | 0.49 | -0.01 | 0.03 | -0.32 |
| 0.82 | 0.59 | 0.23 | 0.54 | -0.01 | 0.03 | -0.33 |
| 0.83 | 0.49 | 0.23 | 0.60 | -0.02 | 0.02 | -0.34 |
| 0.85 | 0.46 | 0.24 | 0.68 | -0.02 | 0.02 | -0.34 |
| 0.87 | 0.48 | 0.25 | 0.76 | -0.03 | 0.02 | -0.34 |
| 0.88 | 0.43 | 0.26 | 0.83 | -0.03 | 0.02 | -0.34 |
| 0.90 | 0.29 | 0.27 | 0.89 | -0.04 | 0.02 | -0.35 |
| 0.92 | 0.25 | 0.28 | 0.93 | -0.05 | 0.02 | -0.35 |
| 0.93 | 0.28 | 0.29 | 0.94 | -0.06 | 0.02 | -0.36 |
| 0.95 | 0.23 | 0.29 | 0.93 | -0.06 | 0.02 | -0.38 |
| 0.97 | 0.31 | 0.30 | 0.89 | -0.06 | 0.02 | -0.39 |
| 0.98 | 0.51 | 0.31 | 0.85 | -0.07 | 0.02 | -0.40 |
| 1.00 | 0.56 | 0.32 | 0.81 | -0.07 | 0.02 | -0.40 |
| 1.02 | 0.46 | 0.32 | 0.76 | -0.08 | 0.02 | -0.40 |
| 1.03 | 0.45 | 0.33 | 0.72 | -0.08 | 0.02 | -0.41 |
| 1.05 | 0.48 | 0.34 | 0.69 | -0.09 | 0.02 | -0.41 |
| 1.07 | 0.46 | 0.35 | 0.65 | -0.09 | 0.02 | -0.41 |
| 1.08 | 0.45 | 0.36 | 0.63 | -0.09 | 0.02 | -0.42 |
| 1.10 | 0.57 | 0.37 | 0.61 | -0.10 | 0.02 | -0.43 |
| 1.12 | 0.63 | 0.38 | 0.59 | -0.10 | 0.02 | -0.44 |
| 1.13 | 0.59 | 0.38 | 0.57 | -0.10 | 0.02 | -0.45 |
| 1.15 | 0.62 | 0.39 | 0.56 | -0.11 | 0.02 | -0.46 |
| 1.17 | 0.60 | 0.40 | 0.54 | -0.12 | 0.02 | -0.45 |
| 1.18 | 0.56 | 0.41 | 0.53 | -0.12 | 0.02 | -0.45 |
| 1.20 | 0.54 | 0.42 | 0.52 | -0.12 | 0.02 | -0.46 |
| 1.22 | 0.53 | 0.43 | 0.51 | -0.12 | 0.02 | -0.46 |
| 1.23 | 0.49 | 0.44 | 0.50 | -0.12 | 0.02 | -0.47 |
| 1.25 | 0.45 | 0.45 | 0.49 | -0.12 | 0.02 | -0.48 |
| 1.27 | 0.37 | 0.46 | 0.49 | -0.13 | 0.02 | -0.49 |
| 1.28 | 0.37 | 0.47 | 0.48 | -0.13 | 0.02 | -0.50 |
| 1.30 | 0.45 | 0.47 | 0.48 | -0.13 | 0.02 | -0.50 |
| 1.32 | 0.42 | 0.48 | 0.47 | -0.13 | 0.02 | -0.51 |
| 1.33 | 0.46 | 0.49 | 0.47 | -0.14 | 0.02 | -0.51 |
| 1.35 | 0.51 | 0.51 | 0.47 | -0.14 | 0.02 | -0.52 |
| 1.37 | 0.49 | 0.52 | 0.46 | -0.14 | 0.02 | -0.52 |
| 1.38 | 0.59 | 0.53 | 0.46 | -0.14 | 0.02 | -0.52 |
| 1.40 | 0.54 | 0.53 | 0.46 | -0.14 | 0.02 | -0.53 |
| 1.42 | 0.46 | 0.55 | 0.46 | -0.15 | 0.02 | -0.53 |
| 1.43 | 0.51 | 0.55 | 0.46 | -0.15 | 0.02 | -0.53 |
| 1.45 | 0.57 | 0.56 | 0.46 | -0.15 | 0.02 | -0.54 |
| 1.47 | 0.51 | 0.57 | 0.46 | -0.15 | 0.02 | -0.54 |
| 1.48 | 0.46 | 0.58 | 0.46 | -0.16 | 0.02 | -0.55 |
| 1.50 | 0.49 | 0.60 | 0.46 | -0.16 | 0.02 | -0.56 |
| 1.52 | 0.45 | 0.61 | 0.47 | -0.17 | 0.02 | -0.57 |
| 1.53 | 0.46 | 0.62 | 0.47 | -0.16 | 0.02 | -0.56 |
| 1.55 | 0.59 | 0.63 | 0.47 | -0.16 | 0.02 | -0.56 |
| 1.57 | 0.56 | 0.64 | 0.48 | -0.17 | 0.02 | -0.56 |
| 1.58 | 0.56 | 0.65 | 0.48 | -0.17 | 0.02 | -0.57 |
| 1.60 | 0.54 | 0.66 | 0.48 | -0.17 | 0.02 | -0.57 |
| 1.62 | 0.46 | 0.68 | 0.49 | -0.17 | 0.02 | -0.58 |
| 1.63 | 0.46 | 0.69 | 0.50 | -0.17 | 0.02 | -0.58 |
| 1.65 | 0.54 | 0.70 | 0.50 | -0.17 | 0.02 | -0.59 |
| 1.67 | 0.63 | 0.72 | 0.51 | -0.17 | 0.02 | -0.60 |
| 1.68 | 0.68 | 0.73 | 0.51 | -0.17 | 0.02 | -0.60 |
| 1.70 | 0.70 | 0.75 | 0.52 | -0.18 | 0.02 | -0.60 |



|      |      |      |      |       |      |       |
|------|------|------|------|-------|------|-------|
| 1.72 | 0.66 | 0.75 | 0.53 | -0.18 | 0.02 | -0.60 |
| 1.73 | 0.59 | 0.77 | 0.53 | -0.18 | 0.02 | -0.61 |
| 1.75 | 0.57 | 0.78 | 0.54 | -0.18 | 0.02 | -0.61 |
| 1.77 | 0.59 | 0.79 | 0.55 | -0.18 | 0.02 | -0.62 |
| 1.78 | 0.53 | 0.81 | 0.55 | -0.18 | 0.02 | -0.62 |
| 1.80 | 0.48 | 0.83 | 0.56 | -0.19 | 0.02 | -0.63 |
| 1.82 | 0.62 | 0.84 | 0.57 | -0.19 | 0.02 | -0.63 |
| 1.83 | 0.77 | 0.85 | 0.58 | -0.19 | 0.02 | -0.63 |
| 1.85 | 0.79 | 0.87 | 0.59 | -0.19 | 0.02 | -0.64 |
| 1.87 | 0.68 | 0.89 | 0.60 | -0.19 | 0.02 | -0.65 |
| 1.88 | 0.63 | 0.91 | 0.61 | -0.20 | 0.02 | -0.65 |
| 1.90 | 0.66 | 0.92 | 0.62 | -0.20 | 0.02 | -0.65 |
| 1.92 | 0.79 | 0.94 | 0.63 | -0.20 | 0.02 | -0.66 |
| 1.93 | 0.91 | 0.95 | 0.64 | -0.20 | 0.02 | -0.66 |
| 1.95 | 0.83 | 0.97 | 0.64 | -0.20 | 0.02 | -0.66 |
| 1.97 | 0.71 | 0.99 | 0.65 | -0.20 | 0.02 | -0.66 |
| 1.98 | 0.70 | 1.00 | 0.66 | -0.21 | 0.02 | -0.67 |
| 2.00 | 0.77 | 1.02 | 0.67 | -0.21 | 0.02 | -0.68 |
| 2.02 | 0.74 | 1.04 | 0.69 | -0.21 | 0.02 | -0.68 |
| 2.03 | 0.66 | 1.05 | 0.70 | -0.21 | 0.02 | -0.68 |
| 2.05 | 0.65 | 1.07 | 0.71 | -0.21 | 0.02 | -0.68 |
| 2.07 | 0.62 | 1.09 | 0.72 | -0.21 | 0.02 | -0.68 |
| 2.08 | 0.59 | 1.11 | 0.73 | -0.21 | 0.02 | -0.69 |
| 2.10 | 0.65 | 1.12 | 0.74 | -0.21 | 0.02 | -0.70 |
| 2.12 | 0.82 | 1.14 | 0.76 | -0.22 | 0.02 | -0.70 |
| 2.13 | 0.96 | 1.16 | 0.77 | -0.22 | 0.02 | -0.71 |
| 2.15 | 0.88 | 1.18 | 0.78 | -0.22 | 0.02 | -0.71 |
| 2.17 | 0.76 | 1.20 | 0.79 | -0.23 | 0.02 | -0.71 |
| 2.18 | 0.79 | 1.22 | 0.81 | -0.23 | 0.02 | -0.72 |
| 2.20 | 0.79 | 1.24 | 0.82 | -0.23 | 0.02 | -0.72 |
| 2.22 | 0.79 | 1.26 | 0.83 | -0.23 | 0.02 | -0.73 |
| 2.23 | 0.77 | 1.28 | 0.84 | -0.23 | 0.02 | -0.74 |
| 2.25 | 0.76 | 1.30 | 0.86 | -0.23 | 0.02 | -0.73 |
| 2.27 | 0.94 | 1.32 | 0.87 | -0.23 | 0.02 | -0.73 |
| 2.28 | 1.13 | 1.34 | 0.89 | -0.23 | 0.02 | -0.74 |
| 2.30 | 1.02 | 1.35 | 0.90 | -0.23 | 0.02 | -0.75 |
| 2.32 | 0.93 | 1.37 | 0.91 | -0.23 | 0.02 | -0.75 |
| 2.33 | 0.96 | 1.39 | 0.93 | -0.23 | 0.02 | -0.75 |
| 2.35 | 1.00 | 1.41 | 0.94 | -0.23 | 0.02 | -0.75 |
| 2.37 | 1.05 | 1.43 | 0.95 | -0.23 | 0.02 | -0.75 |
| 2.38 | 1.07 | 1.45 | 0.97 | -0.24 | 0.02 | -0.74 |
| 2.40 | 1.10 | 1.46 | 0.98 | -0.24 | 0.02 | -0.75 |
| 2.42 | 1.08 | 1.47 | 1.00 | -0.24 | 0.02 | -0.76 |
| 2.43 | 1.00 | 1.48 | 1.01 | -0.24 | 0.02 | -0.76 |
| 2.45 | 0.90 | 1.50 | 1.03 | -0.24 | 0.02 | -0.76 |
| 2.47 | 0.83 | 1.52 | 1.04 | -0.23 | 0.02 | -0.77 |
| 2.48 | 0.90 | 1.53 | 1.06 | -0.23 | 0.02 | -0.78 |
| 2.50 | 1.17 | 1.54 | 1.07 | -0.23 | 0.02 | -0.78 |
| 2.52 | 1.25 | 1.55 | 1.09 | -0.23 | 0.02 | -0.79 |
| 2.53 | 1.00 | 1.56 | 1.11 | -0.23 | 0.02 | -0.78 |
| 2.55 | 0.85 | 1.57 | 1.12 | -0.23 | 0.02 | -0.79 |
| 2.57 | 0.91 | 1.58 | 1.13 | -0.23 | 0.02 | -0.79 |
| 2.58 | 1.02 | 1.60 | 1.15 | -0.22 | 0.02 | -0.79 |
| 2.60 | 1.04 | 1.60 | 1.17 | -0.22 | 0.02 | -0.79 |
| 2.62 | 1.04 | 1.61 | 1.19 | -0.22 | 0.02 | -0.79 |
| 2.63 | 1.05 | 1.61 | 1.20 | -0.21 | 0.02 | -0.80 |
| 2.65 | 1.05 | 1.62 | 1.22 | -0.20 | 0.02 | -0.81 |
| 2.67 | 1.04 | 1.62 | 1.23 | -0.20 | 0.02 | -0.82 |
| 2.68 | 1.13 | 1.63 | 1.25 | -0.19 | 0.02 | -0.82 |
| 2.70 | 1.27 | 1.63 | 1.27 | -0.18 | 0.02 | -0.81 |
| 2.72 | 1.17 | 1.63 | 1.29 | -0.17 | 0.02 | -0.80 |
| 2.73 | 1.00 | 1.63 | 1.30 | -0.16 | 0.02 | -0.80 |
| 2.75 | 0.99 | 1.62 | 1.32 | -0.15 | 0.02 | -0.81 |
| 2.77 | 1.07 | 1.62 | 1.34 | -0.13 | 0.02 | -0.81 |
| 2.78 | 1.21 | 1.62 | 1.36 | -0.09 | 0.02 | -0.82 |
| 2.80 | 1.36 | 1.62 | 1.37 | -0.05 | 0.02 | -0.83 |
| 2.82 | 1.41 | 1.61 | 1.39 | 0.02  | 0.02 | -0.83 |
| 2.83 | 1.33 | 1.61 | 1.41 | 0.11  | 0.02 | -0.83 |
| 2.85 | 1.33 | 1.60 | 1.42 | 0.24  | 0.02 | -0.84 |



|      |      |      |      |       |      |       |
|------|------|------|------|-------|------|-------|
| 2.87 | 1.41 | 1.59 | 1.44 | 0.39  | 0.02 | -0.84 |
| 2.88 | 1.34 | 1.59 | 1.46 | 0.57  | 0.02 | -0.84 |
| 2.90 | 1.25 | 1.57 | 1.48 | 0.78  | 0.02 | -0.84 |
| 2.92 | 1.34 | 1.56 | 1.50 | 1.00  | 0.02 | -0.85 |
| 2.93 | 1.45 | 1.55 | 1.51 | 1.23  | 0.02 | -0.85 |
| 2.95 | 1.41 | 1.53 | 1.53 | 1.46  | 0.02 | -0.85 |
| 2.97 | 1.28 | 1.51 | 1.55 | 1.69  | 0.02 | -0.85 |
| 2.98 | 1.36 | 1.49 | 1.57 | 1.93  | 0.02 | -0.86 |
| 3.00 | 1.55 | 1.47 | 1.58 | 2.18  | 0.02 | -0.87 |
| 3.02 | 1.53 | 1.45 | 1.60 | 2.44  | 0.02 | -0.87 |
| 3.03 | 1.50 | 1.43 | 1.62 | 2.73  | 0.02 | -0.87 |
| 3.05 | 1.55 | 1.40 | 1.64 | 3.04  | 0.02 | -0.87 |
| 3.07 | 1.51 | 1.38 | 1.65 | 3.37  | 0.02 | -0.88 |
| 3.08 | 1.47 | 1.35 | 1.67 | 3.72  | 0.02 | -0.88 |
| 3.10 | 1.47 | 1.33 | 1.69 | 4.06  | 0.02 | -0.88 |
| 3.12 | 1.47 | 1.30 | 1.71 | 4.40  | 0.02 | -0.88 |
| 3.13 | 1.50 | 1.27 | 1.73 | 4.71  | 0.02 | -0.89 |
| 3.15 | 1.50 | 1.23 | 1.74 | 5.00  | 0.02 | -0.89 |
| 3.17 | 1.48 | 1.20 | 1.76 | 5.27  | 0.03 | -0.89 |
| 3.18 | 1.51 | 1.16 | 1.78 | 5.52  | 0.03 | -0.89 |
| 3.20 | 1.51 | 1.13 | 1.80 | 5.77  | 0.02 | -0.90 |
| 3.22 | 1.45 | 1.10 | 1.81 | 6.04  | 0.02 | -0.90 |
| 3.23 | 1.48 | 1.06 | 1.83 | 6.34  | 0.02 | -0.90 |
| 3.25 | 1.58 | 1.03 | 1.85 | 6.69  | 0.02 | -0.90 |
| 3.27 | 1.56 | 0.99 | 1.86 | 7.08  | 0.02 | -0.90 |
| 3.28 | 1.47 | 0.95 | 1.88 | 7.52  | 0.02 | -0.91 |
| 3.30 | 1.41 | 0.92 | 1.90 | 8.00  | 0.02 | -0.91 |
| 3.32 | 1.45 | 0.89 | 1.91 | 8.52  | 0.02 | -0.90 |
| 3.33 | 1.61 | 0.86 | 1.93 | 9.08  | 0.02 | -0.91 |
| 3.35 | 1.61 | 0.82 | 1.95 | 9.66  | 0.02 | -0.92 |
| 3.37 | 1.41 | 0.79 | 1.96 | 10.26 | 0.02 | -0.92 |
| 3.38 | 1.41 | 0.76 | 1.98 | 10.88 | 0.02 | -0.92 |
| 3.40 | 1.56 | 0.73 | 2.00 | 11.51 | 0.02 | -0.92 |
| 3.42 | 1.59 | 0.69 | 2.01 | 12.16 | 0.02 | -0.92 |
| 3.43 | 1.56 | 0.66 | 2.03 | 12.82 | 0.02 | -0.92 |
| 3.45 | 1.53 | 0.64 | 2.05 | 13.47 | 0.02 | -0.92 |
| 3.47 | 1.53 | 0.61 | 2.06 | 14.13 | 0.02 | -0.92 |
| 3.48 | 1.56 | 0.59 | 2.08 | 14.79 | 0.02 | -0.93 |
| 3.50 | 1.64 | 0.56 | 2.09 | 15.43 | 0.02 | -0.94 |
| 3.52 | 1.68 | 0.54 | 2.11 | 16.07 | 0.02 | -0.94 |
| 3.53 | 1.62 | 0.52 | 2.12 | 16.69 | 0.02 | -0.94 |
| 3.55 | 1.59 | 0.50 | 2.14 | 17.30 | 0.02 | -0.94 |
| 3.57 | 1.56 | 0.48 | 2.15 | 17.88 | 0.02 | -0.95 |
| 3.58 | 1.58 | 0.46 | 2.17 | 18.44 | 0.02 | -0.95 |
| 3.60 | 1.50 | 0.45 | 2.18 | 18.97 | 0.02 | -0.94 |
| 3.62 | 1.38 | 0.43 | 2.20 | 19.48 | 0.02 | -0.94 |
| 3.63 | 1.42 | 0.41 | 2.21 | 19.96 | 0.02 | -0.95 |
| 3.65 | 1.59 | 0.39 | 2.22 | 20.39 | 0.02 | -0.95 |
| 3.67 | 1.67 | 0.38 | 2.24 | 20.79 | 0.02 | -0.95 |
| 3.68 | 1.72 | 0.36 | 2.25 | 21.15 | 0.02 | -0.95 |
| 3.70 | 1.79 | 0.35 | 2.26 | 21.47 | 0.02 | -0.96 |
| 3.72 | 1.78 | 0.34 | 2.27 | 21.73 | 0.02 | -0.97 |
| 3.73 | 1.76 | 0.33 | 2.29 | 21.95 | 0.02 | -0.97 |
| 3.75 | 1.76 | 0.32 | 2.30 | 22.12 | 0.02 | -0.97 |
| 3.77 | 1.82 | 0.30 | 2.31 | 22.25 | 0.02 | -0.97 |
| 3.78 | 1.85 | 0.29 | 2.32 | 22.32 | 0.02 | -0.97 |
| 3.80 | 1.81 | 0.28 | 2.33 | 22.35 | 0.02 | -0.97 |
| 3.82 | 1.78 | 0.28 | 2.34 | 22.33 | 0.02 | -0.97 |
| 3.83 | 1.73 | 0.27 | 2.36 | 22.27 | 0.02 | -0.97 |
| 3.85 | 1.61 | 0.26 | 2.37 | 22.17 | 0.02 | -0.98 |
| 3.87 | 1.72 | 0.25 | 2.38 | 22.02 | 0.02 | -0.98 |
| 3.88 | 2.01 | 0.25 | 2.39 | 21.83 | 0.02 | -0.99 |
| 3.90 | 2.10 | 0.24 | 2.39 | 21.61 | 0.02 | -1.00 |
| 3.92 | 2.04 | 0.23 | 2.40 | 21.34 | 0.03 | -1.00 |
| 3.93 | 2.06 | 0.22 | 2.41 | 21.05 | 0.02 | -1.00 |
| 3.95 | 2.06 | 0.22 | 2.42 | 20.72 | 0.02 | -1.00 |
| 3.97 | 2.06 | 0.21 | 2.43 | 20.37 | 0.02 | -1.00 |
| 3.98 | 2.04 | 0.21 | 2.44 | 19.99 | 0.03 | -1.01 |
| 4.00 | 2.02 | 0.20 | 2.45 | 19.59 | 0.03 | -1.01 |





|      |      |      |      |       |      |       |
|------|------|------|------|-------|------|-------|
| 4.02 | 2.10 | 0.20 | 2.45 | 19.17 | 0.03 | -1.01 |
| 4.03 | 2.12 | 0.19 | 2.46 | 18.73 | 0.03 | -1.01 |
| 4.05 | 2.07 | 0.19 | 2.47 | 18.28 | 0.03 | -1.01 |
| 4.07 | 2.10 | 0.19 | 2.47 | 17.82 | 0.03 | -1.01 |
| 4.08 | 2.23 | 0.18 | 2.48 | 17.35 | 0.02 | -1.01 |
| 4.10 | 2.23 | 0.18 | 2.48 | 16.86 | 0.02 | -1.02 |
| 4.12 | 2.10 | 0.17 | 2.49 | 16.38 | 0.03 | -1.02 |
| 4.13 | 2.15 | 0.17 | 2.49 | 15.89 | 0.03 | -1.02 |
| 4.15 | 2.15 | 0.17 | 2.50 | 15.40 | 0.03 | -1.02 |
| 4.17 | 2.07 | 0.17 | 2.50 | 14.91 | 0.03 | -1.01 |
| 4.18 | 2.12 | 0.17 | 2.51 | 14.42 | 0.03 | -1.02 |
| 4.20 | 2.15 | 0.16 | 2.51 | 13.94 | 0.02 | -1.03 |
| 4.22 | 2.10 | 0.16 | 2.51 | 13.46 | 0.02 | -1.03 |
| 4.23 | 2.07 | 0.16 | 2.52 | 12.99 | 0.03 | -1.03 |
| 4.25 | 2.09 | 0.15 | 2.52 | 12.53 | 0.03 | -1.04 |
| 4.27 | 2.07 | 0.15 | 2.52 | 12.08 | 0.02 | -1.04 |
| 4.28 | 2.09 | 0.15 | 2.52 | 11.64 | 0.03 | -1.04 |
| 4.30 | 2.18 | 0.15 | 2.53 | 11.20 | 0.03 | -1.03 |
| 4.32 | 2.16 | 0.15 | 2.53 | 10.78 | 0.03 | -1.04 |
| 4.33 | 2.09 | 0.15 | 2.53 | 10.37 | 0.03 | -1.04 |
| 4.35 | 2.07 | 0.15 | 2.53 | 9.97  | 0.03 | -1.03 |
| 4.37 | 2.04 | 0.15 | 2.53 | 9.59  | 0.03 | -1.04 |
| 4.38 | 2.09 | 0.15 | 2.53 | 9.21  | 0.03 | -1.04 |
| 4.40 | 2.18 | 0.14 | 2.53 | 8.85  | 0.03 | -1.05 |
| 4.42 | 2.16 | 0.14 | 2.53 | 8.50  | 0.03 | -1.05 |
| 4.43 | 2.07 | 0.14 | 2.53 | 8.16  | 0.03 | -1.04 |
| 4.45 | 2.07 | 0.14 | 2.53 | 7.84  | 0.03 | -1.04 |
| 4.47 | 2.15 | 0.14 | 2.53 | 7.54  | 0.03 | -1.05 |
| 4.48 | 2.07 | 0.14 | 2.52 | 7.24  | 0.03 | -1.05 |
| 4.50 | 2.01 | 0.14 | 2.52 | 6.95  | 0.02 | -1.06 |
| 4.52 | 2.06 | 0.14 | 2.52 | 6.67  | 0.02 | -1.06 |
| 4.53 | 2.06 | 0.14 | 2.52 | 6.40  | 0.03 | -1.06 |
| 4.55 | 2.16 | 0.14 | 2.52 | 6.15  | 0.03 | -1.06 |
| 4.57 | 2.27 | 0.14 | 2.51 | 5.90  | 0.03 | -1.06 |
| 4.58 | 2.16 | 0.14 | 2.51 | 5.67  | 0.03 | -1.06 |
| 4.60 | 2.12 | 0.14 | 2.51 | 5.44  | 0.03 | -1.07 |
| 4.62 | 2.21 | 0.14 | 2.51 | 5.23  | 0.03 | -1.07 |
| 4.63 | 2.32 | 0.14 | 2.50 | 5.02  | 0.03 | -1.07 |
| 4.65 | 2.29 | 0.14 | 2.50 | 4.82  | 0.03 | -1.08 |
| 4.67 | 2.18 | 0.14 | 2.49 | 4.63  | 0.03 | -1.08 |
| 4.68 | 2.19 | 0.14 | 2.49 | 4.44  | 0.03 | -1.08 |
| 4.70 | 2.12 | 0.14 | 2.49 | 4.27  | 0.03 | -1.08 |
| 4.72 | 2.09 | 0.14 | 2.48 | 4.10  | 0.03 | -1.08 |
| 4.73 | 2.15 | 0.14 | 2.48 | 3.93  | 0.03 | -1.08 |
| 4.75 | 2.18 | 0.14 | 2.47 | 3.78  | 0.03 | -1.08 |
| 4.77 | 2.16 | 0.14 | 2.47 | 3.63  | 0.03 | -1.08 |
| 4.78 | 2.19 | 0.14 | 2.47 | 3.48  | 0.03 | -1.08 |
| 4.80 | 2.29 | 0.14 | 2.46 | 3.35  | 0.03 | -1.09 |
| 4.82 | 2.30 | 0.14 | 2.46 | 3.21  | 0.03 | -1.09 |
| 4.83 | 2.24 | 0.14 | 2.45 | 3.09  | 0.03 | -1.09 |
| 4.85 | 2.23 | 0.14 | 2.45 | 2.96  | 0.03 | -1.09 |
| 4.87 | 2.12 | 0.14 | 2.44 | 2.85  | 0.03 | -1.09 |
| 4.88 | 2.01 | 0.14 | 2.44 | 2.73  | 0.03 | -1.10 |
| 4.90 | 2.01 | 0.13 | 2.43 | 2.62  | 0.03 | -1.11 |
| 4.92 | 2.07 | 0.13 | 2.42 | 2.52  | 0.03 | -1.11 |
| 4.93 | 2.15 | 0.13 | 2.42 | 2.41  | 0.03 | -1.10 |
| 4.95 | 2.13 | 0.13 | 2.42 | 2.32  | 0.03 | -1.09 |
| 4.97 | 2.18 | 0.13 | 2.41 | 2.22  | 0.03 | -1.10 |
| 4.98 | 2.36 | 0.13 | 2.41 | 2.14  | 0.03 | -1.11 |
| 5.00 | 2.36 | 0.13 | 2.40 | 2.05  | 0.03 | -1.11 |
| 5.02 | 2.26 | 0.13 | 2.40 | 1.96  | 0.03 | -1.11 |
| 5.03 | 2.27 | 0.13 | 2.40 | 1.88  | 0.03 | -1.12 |
| 5.05 | 2.38 | 0.13 | 2.39 | 1.80  | 0.03 | -1.12 |
| 5.07 | 2.43 | 0.12 | 2.39 | 1.72  | 0.03 | -1.12 |
| 5.08 | 2.35 | 0.12 | 2.38 | 1.65  | 0.03 | -1.12 |
| 5.10 | 2.33 | 0.12 | 2.38 | 1.58  | 0.03 | -1.12 |
| 5.12 | 2.41 | 0.12 | 2.38 | 1.51  | 0.03 | -1.12 |
| 5.13 | 2.35 | 0.11 | 2.38 | 1.44  | 0.03 | -1.12 |
| 5.15 | 2.26 | 0.11 | 2.37 | 1.38  | 0.03 | -1.12 |



|      |      |       |      |       |      |       |
|------|------|-------|------|-------|------|-------|
| 5.17 | 2.23 | 0.11  | 2.37 | 1.32  | 0.03 | -1.12 |
| 5.18 | 2.26 | 0.10  | 2.37 | 1.26  | 0.03 | -1.12 |
| 5.20 | 2.41 | 0.10  | 2.36 | 1.20  | 0.03 | -1.12 |
| 5.22 | 2.53 | 0.10  | 2.36 | 1.14  | 0.03 | -1.12 |
| 5.23 | 2.46 | 0.09  | 2.36 | 1.09  | 0.03 | -1.12 |
| 5.25 | 2.32 | 0.08  | 2.36 | 1.03  | 0.03 | -1.12 |
| 5.27 | 2.38 | 0.08  | 2.36 | 0.98  | 0.03 | -1.13 |
| 5.28 | 2.47 | 0.08  | 2.36 | 0.94  | 0.03 | -1.13 |
| 5.30 | 2.46 | 0.07  | 2.36 | 0.89  | 0.03 | -1.13 |
| 5.32 | 2.32 | 0.07  | 2.36 | 0.84  | 0.03 | -1.14 |
| 5.33 | 2.24 | 0.06  | 2.36 | 0.80  | 0.03 | -1.15 |
| 5.35 | 2.36 | 0.05  | 2.36 | 0.75  | 0.03 | -1.15 |
| 5.37 | 2.40 | 0.05  | 2.37 | 0.71  | 0.02 | -1.15 |
| 5.38 | 2.33 | 0.05  | 2.37 | 0.67  | 0.03 | -1.14 |
| 5.40 | 2.35 | 0.04  | 2.37 | 0.63  | 0.03 | -1.14 |
| 5.42 | 2.33 | 0.03  | 2.37 | 0.59  | 0.03 | -1.14 |
| 5.43 | 2.30 | 0.02  | 2.38 | 0.55  | 0.03 | -1.14 |
| 5.45 | 2.38 | 0.02  | 2.38 | 0.52  | 0.03 | -1.15 |
| 5.47 | 2.43 | 0.01  | 2.38 | 0.49  | 0.02 | -1.16 |
| 5.48 | 2.46 | 0.01  | 2.39 | 0.45  | 0.02 | -1.16 |
| 5.50 | 2.46 | 0.01  | 2.39 | 0.41  | 0.03 | -1.16 |
| 5.52 | 2.46 | 0.00  | 2.40 | 0.38  | 0.03 | -1.16 |
| 5.53 | 2.50 | -0.01 | 2.40 | 0.35  | 0.02 | -1.16 |
| 5.55 | 2.41 | -0.01 | 2.41 | 0.32  | 0.02 | -1.16 |
| 5.57 | 2.35 | -0.02 | 2.42 | 0.29  | 0.02 | -1.16 |
| 5.58 | 2.43 | -0.03 | 2.42 | 0.25  | 0.03 | -1.15 |
| 5.60 | 2.52 | -0.03 | 2.43 | 0.22  | 0.03 | -1.16 |
| 5.62 | 2.58 | -0.04 | 2.44 | 0.20  | 0.03 | -1.16 |
| 5.63 | 2.58 | -0.04 | 2.44 | 0.18  | 0.03 | -1.17 |
| 5.65 | 2.60 | -0.05 | 2.45 | 0.15  | 0.03 | -1.16 |
| 5.67 | 2.55 | -0.05 | 2.46 | 0.12  | 0.03 | -1.16 |
| 5.68 | 2.60 | -0.06 | 2.47 | 0.10  | 0.02 | -1.16 |
| 5.70 | 2.69 | -0.06 | 2.48 | 0.08  | 0.02 | -1.17 |
| 5.72 | 2.63 | -0.07 | 2.49 | 0.05  | 0.02 | -1.16 |
| 5.73 | 2.58 | -0.07 | 2.50 | 0.03  | 0.02 | -1.16 |
| 5.75 | 2.49 | -0.07 | 2.51 | 0.01  | 0.03 | -1.17 |
| 5.77 | 2.38 | -0.07 | 2.52 | -0.01 | 0.03 | -1.18 |
| 5.78 | 2.44 | -0.07 | 2.53 | -0.03 | 0.03 | -1.18 |
| 5.80 | 2.57 | -0.08 | 2.55 | -0.05 | 0.03 | -1.18 |
| 5.82 | 2.55 | -0.08 | 2.56 | -0.07 | 0.03 | -1.18 |
| 5.83 | 2.53 | -0.09 | 2.57 | -0.09 | 0.03 | -1.18 |
| 5.85 | 2.58 | -0.09 | 2.58 | -0.11 | 0.03 | -1.18 |
| 5.87 | 2.55 | -0.09 | 2.59 | -0.12 | 0.02 | -1.19 |
| 5.88 | 2.46 | -0.10 | 2.61 | -0.13 | 0.02 | -1.19 |
| 5.90 | 2.46 | -0.10 | 2.62 | -0.15 | 0.02 | -1.19 |
| 5.92 | 2.57 | -0.10 | 2.63 | -0.17 | 0.02 | -1.19 |
| 5.93 | 2.57 | -0.11 | 2.64 | -0.19 | 0.02 | -1.19 |
| 5.95 | 2.50 | -0.11 | 2.66 | -0.21 | 0.02 | -1.19 |
| 5.97 | 2.55 | -0.11 | 2.68 | -0.22 | 0.02 | -1.19 |
| 5.98 | 2.64 | -0.11 | 2.69 | -0.23 | 0.02 | -1.19 |
| 6.00 | 2.60 | -0.11 | 2.70 | -0.25 | 0.02 | -1.19 |
| 6.02 | 2.58 | -0.11 | 2.72 | -0.26 | 0.02 | -1.19 |
| 6.03 | 2.60 | -0.12 | 2.73 | -0.27 | 0.02 | -1.19 |
| 6.05 | 2.49 | -0.12 | 2.74 | -0.29 | 0.03 | -1.20 |
| 6.07 | 2.60 | -0.13 | 2.76 | -0.30 | 0.03 | -1.20 |
| 6.08 | 2.67 | -0.12 | 2.77 | -0.31 | 0.02 | -1.20 |
| 6.10 | 2.64 | -0.13 | 2.78 | -0.32 | 0.02 | -1.20 |
| 6.12 | 2.60 | -0.13 | 2.80 | -0.33 | 0.02 | -1.20 |
| 6.13 | 2.55 | -0.14 | 2.81 | -0.34 | 0.02 | -1.20 |
| 6.15 | 2.66 | -0.14 | 2.82 | -0.35 | 0.02 | -1.20 |
| 6.17 | 2.78 | -0.14 | 2.83 | -0.37 | 0.02 | -1.20 |
| 6.18 | 2.86 | -0.14 | 2.85 | -0.37 | 0.02 | -1.20 |
| 6.20 | 2.81 | -0.14 | 2.86 | -0.38 | 0.02 | -1.21 |
| 6.22 | 2.69 | -0.14 | 2.87 | -0.39 | 0.02 | -1.21 |
| 6.23 | 2.72 | -0.14 | 2.89 | -0.39 | 0.02 | -1.20 |
| 6.25 | 2.77 | -0.15 | 2.90 | -0.40 | 0.02 | -1.20 |
| 6.27 | 2.69 | -0.15 | 2.91 | -0.41 | 0.02 | -1.21 |
| 6.28 | 2.57 | -0.15 | 2.92 | -0.42 | 0.02 | -1.21 |
| 6.30 | 2.47 | -0.15 | 2.93 | -0.43 | 0.02 | -1.21 |



|      |      |       |      |       |      |       |
|------|------|-------|------|-------|------|-------|
| 6.32 | 2.52 | -0.15 | 2.94 | -0.44 | 0.02 | -1.21 |
| 6.33 | 2.57 | -0.16 | 2.95 | -0.45 | 0.02 | -1.22 |
| 6.35 | 2.57 | -0.16 | 2.96 | -0.45 | 0.02 | -1.22 |
| 6.37 | 2.49 | -0.16 | 2.97 | -0.46 | 0.02 | -1.22 |
| 6.38 | 2.52 | -0.16 | 2.98 | -0.46 | 0.02 | -1.22 |
| 6.40 | 2.64 | -0.16 | 2.98 | -0.47 | 0.02 | -1.22 |
| 6.42 | 2.60 | -0.16 | 2.99 | -0.48 | 0.02 | -1.22 |
| 6.43 | 2.57 | -0.16 | 3.00 | -0.49 | 0.02 | -1.22 |
| 6.45 | 2.66 | -0.16 | 3.01 | -0.49 | 0.02 | -1.22 |
| 6.47 | 2.74 | -0.17 | 3.01 | -0.50 | 0.03 | -1.22 |
| 6.48 | 2.72 | -0.17 | 3.02 | -0.50 | 0.02 | -1.23 |
| 6.50 | 2.67 | -0.17 | 3.02 | -0.51 | 0.02 | -1.23 |
| 6.52 | 2.67 | -0.17 | 3.02 | -0.51 | 0.02 | -1.23 |
| 6.53 | 2.67 | -0.17 | 3.03 | -0.51 | 0.02 | -1.23 |
| 6.55 | 2.70 | -0.17 | 3.03 | -0.52 | 0.02 | -1.22 |
| 6.57 | 2.67 | -0.17 | 3.04 | -0.52 | 0.02 | -1.22 |
| 6.58 | 2.66 | -0.17 | 3.04 | -0.53 | 0.02 | -1.22 |
| 6.60 | 2.77 | -0.18 | 3.04 | -0.54 | 0.02 | -1.23 |
| 6.62 | 2.83 | -0.17 | 3.04 | -0.54 | 0.03 | -1.23 |
| 6.63 | 2.80 | -0.18 | 3.04 | -0.55 | 0.02 | -1.23 |
| 6.65 | 2.78 | -0.18 | 3.04 | -0.55 | 0.02 | -1.23 |
| 6.67 | 2.78 | -0.18 | 3.03 | -0.55 | 0.02 | -1.23 |
| 6.68 | 2.87 | -0.18 | 3.03 | -0.56 | 0.02 | -1.23 |
| 6.70 | 2.97 | -0.18 | 3.03 | -0.56 | 0.02 | -1.23 |
| 6.72 | 2.84 | -0.18 | 3.03 | -0.56 | 0.02 | -1.23 |
| 6.73 | 2.64 | -0.18 | 3.02 | -0.57 | 0.03 | -1.24 |
| 6.75 | 2.58 | -0.19 | 3.02 | -0.57 | 0.02 | -1.24 |
| 6.77 | 2.72 | -0.19 | 3.01 | -0.58 | 0.02 | -1.24 |
| 6.78 | 2.86 | -0.19 | 3.01 | -0.58 | 0.03 | -1.24 |
| 6.80 | 2.86 | -0.19 | 3.00 | -0.58 | 0.03 | -1.23 |
| 6.82 | 2.86 | -0.18 | 2.99 | -0.58 | 0.02 | -1.23 |
| 6.83 | 2.81 | -0.18 | 2.98 | -0.59 | 0.03 | -1.24 |
| 6.85 | 2.81 | -0.19 | 2.97 | -0.59 | 0.02 | -1.24 |
| 6.87 | 2.75 | -0.19 | 2.96 | -0.59 | 0.03 | -1.24 |
| 6.88 | 2.64 | -0.19 | 2.95 | -0.60 | 0.03 | -1.25 |
| 6.90 | 2.74 | -0.19 | 2.94 | -0.60 | 0.03 | -1.24 |
| 6.92 | 2.80 | -0.19 | 2.93 | -0.60 | 0.03 | -1.25 |
| 6.93 | 2.80 | -0.19 | 2.92 | -0.60 | 0.03 | -1.25 |
| 6.95 | 2.83 | -0.19 | 2.91 | -0.61 | 0.02 | -1.25 |
| 6.97 | 2.77 | -0.19 | 2.89 | -0.61 | 0.02 | -1.25 |
| 6.98 | 2.70 | -0.19 | 2.88 | -0.61 | 0.02 | -1.25 |
| 7.00 | 2.72 | -0.19 | 2.86 | -0.61 | 0.02 | -1.25 |
| 7.02 | 2.67 | -0.19 | 2.84 | -0.61 | 0.02 | -1.25 |
| 7.03 | 2.64 | -0.19 | 2.83 | -0.62 | 0.02 | -1.26 |
| 7.05 | 2.81 | -0.19 | 2.81 | -0.62 | 0.03 | -1.26 |
| 7.07 | 2.92 | -0.19 | 2.80 | -0.62 | 0.03 | -1.26 |
| 7.08 | 2.84 | -0.19 | 2.78 | -0.63 | 0.02 | -1.26 |
| 7.10 | 2.84 | -0.20 | 2.76 | -0.63 | 0.02 | -1.26 |
| 7.12 | 2.87 | -0.20 | 2.74 | -0.63 | 0.02 | -1.26 |
| 7.13 | 2.77 | -0.20 | 2.72 | -0.63 | 0.02 | -1.27 |
| 7.15 | 2.72 | -0.20 | 2.70 | -0.63 | 0.02 | -1.27 |
| 7.17 | 2.72 | -0.20 | 2.68 | -0.63 | 0.03 | -1.27 |
| 7.18 | 2.60 | -0.20 | 2.66 | -0.64 | 0.03 | -1.27 |
| 7.20 | 2.52 | -0.20 | 2.64 | -0.64 | 0.02 | -1.27 |
| 7.22 | 2.57 | -0.20 | 2.62 | -0.64 | 0.02 | -1.28 |
| 7.23 | 2.72 | -0.20 | 2.59 | -0.64 | 0.03 | -1.28 |
| 7.25 | 2.86 | -0.21 | 2.57 | -0.64 | 0.03 | -1.28 |
| 7.27 | 2.81 | -0.21 | 2.55 | -0.64 | 0.03 | -1.28 |
| 7.28 | 2.69 | -0.21 | 2.52 | -0.65 | 0.02 | -1.27 |
| 7.30 | 2.70 | -0.21 | 2.50 | -0.65 | 0.02 | -1.27 |
| 7.32 | 2.67 | -0.21 | 2.48 | -0.65 | 0.03 | -1.27 |
| 7.33 | 2.64 | -0.21 | 2.45 | -0.65 | 0.03 | -1.28 |
| 7.35 | 2.72 | -0.21 | 2.43 | -0.65 | 0.03 | -1.28 |
| 7.37 | 2.87 | -0.21 | 2.40 | -0.66 | 0.03 | -1.27 |
| 7.38 | 3.00 | -0.21 | 2.38 | -0.67 | 0.03 | -1.27 |
| 7.40 | 3.00 | -0.21 | 2.35 | -0.67 | 0.03 | -1.28 |
| 7.42 | 2.95 | -0.21 | 2.32 | -0.67 | 0.03 | -1.28 |
| 7.43 | 2.98 | -0.21 | 2.30 | -0.67 | 0.03 | -1.29 |
| 7.45 | 3.01 | -0.22 | 2.27 | -0.68 | 0.03 | -1.29 |



|      |      |       |      |       |      |       |
|------|------|-------|------|-------|------|-------|
| 7.47 | 2.89 | -0.21 | 2.24 | -0.68 | 0.03 | -1.29 |
| 7.48 | 2.75 | -0.21 | 2.21 | -0.68 | 0.03 | -1.28 |
| 7.50 | 2.80 | -0.21 | 2.19 | -0.68 | 0.03 | -1.28 |
| 7.52 | 2.92 | -0.21 | 2.16 | -0.68 | 0.03 | -1.28 |
| 7.53 | 2.92 | -0.21 | 2.13 | -0.69 | 0.03 | -1.28 |
| 7.55 | 2.89 | -0.21 | 2.11 | -0.69 | 0.03 | -1.28 |
| 7.57 | 3.01 | -0.22 | 2.08 | -0.68 | 0.02 | -1.28 |
| 7.58 | 3.12 | -0.21 | 2.05 | -0.69 | 0.03 | -1.29 |
| 7.60 | 3.01 | -0.21 | 2.03 | -0.69 | 0.03 | -1.29 |
| 7.62 | 2.83 | -0.22 | 2.00 | -0.69 | 0.03 | -1.29 |
| 7.63 | 2.77 | -0.22 | 1.97 | -0.69 | 0.02 | -1.30 |
| 7.65 | 2.84 | -0.21 | 1.94 | -0.69 | 0.03 | -1.30 |
| 7.67 | 3.01 | -0.21 | 1.91 | -0.69 | 0.03 | -1.30 |
| 7.68 | 3.09 | -0.21 | 1.89 | -0.70 | 0.03 | -1.30 |
| 7.70 | 3.04 | -0.22 | 1.86 | -0.70 | 0.03 | -1.30 |
| 7.72 | 2.98 | -0.22 | 1.83 | -0.70 | 0.03 | -1.30 |
| 7.73 | 2.95 | -0.22 | 1.81 | -0.69 | 0.03 | -1.30 |
| 7.75 | 3.03 | -0.22 | 1.78 | -0.69 | 0.03 | -1.30 |
| 7.77 | 3.09 | -0.22 | 1.75 | -0.69 | 0.03 | -1.30 |
| 7.78 | 3.09 | -0.22 | 1.73 | -0.69 | 0.03 | -1.31 |
| 7.80 | 2.98 | -0.22 | 1.70 | -0.69 | 0.03 | -1.30 |
| 7.82 | 2.87 | -0.22 | 1.67 | -0.69 | 0.02 | -1.30 |
| 7.83 | 2.92 | -0.22 | 1.65 | -0.69 | 0.02 | -1.31 |
| 7.85 | 2.94 | -0.22 | 1.62 | -0.70 | 0.02 | -1.31 |
| 7.87 | 2.94 | -0.22 | 1.60 | -0.70 | 0.03 | -1.31 |
| 7.88 | 2.89 | -0.22 | 1.57 | -0.70 | 0.03 | -1.31 |
| 7.90 | 2.95 | -0.23 | 1.55 | -0.69 | 0.02 | -1.32 |
| 7.92 | 3.00 | -0.23 | 1.52 | -0.70 | 0.02 | -1.32 |
| 7.93 | 2.92 | -0.23 | 1.50 | -0.70 | 0.02 | -1.32 |
| 7.95 | 3.04 | -0.22 | 1.47 | -0.70 | 0.03 | -1.31 |
| 7.97 | 3.20 | -0.22 | 1.45 | -0.70 | 0.03 | -1.31 |
| 7.98 | 3.18 | -0.22 | 1.42 | -0.70 | 0.02 | -1.31 |
| 8.00 | 3.09 | -0.22 | 1.40 | -0.70 | 0.02 | -1.32 |
| 8.02 | 3.03 | -0.22 | 1.38 | -0.71 | 0.02 | -1.32 |
| 8.03 | 3.09 | -0.22 | 1.35 | -0.71 | 0.02 | -1.32 |
| 8.05 | 3.21 | -0.22 | 1.33 | -0.71 | 0.02 | -1.32 |
| 8.07 | 3.21 | -0.22 | 1.31 | -0.71 | 0.02 | -1.32 |
| 8.08 | 3.12 | -0.22 | 1.28 | -0.71 | 0.02 | -1.33 |
| 8.10 | 3.08 | -0.22 | 1.26 | -0.71 | 0.02 | -1.33 |
| 8.12 | 3.04 | -0.22 | 1.24 | -0.71 | 0.02 | -1.33 |
| 8.13 | 3.06 | -0.22 | 1.22 | -0.71 | 0.02 | -1.33 |
| 8.15 | 3.03 | -0.22 | 1.20 | -0.71 | 0.02 | -1.32 |
| 8.17 | 3.01 | -0.23 | 1.18 | -0.71 | 0.02 | -1.32 |
| 8.18 | 3.11 | -0.23 | 1.15 | -0.72 | 0.02 | -1.33 |
| 8.20 | 3.14 | -0.23 | 1.13 | -0.72 | 0.02 | -1.33 |
| 8.22 | 3.11 | -0.23 | 1.11 | -0.72 | 0.02 | -1.33 |
| 8.23 | 3.04 | -0.23 | 1.09 | -0.72 | 0.02 | -1.33 |
| 8.25 | 2.95 | -0.23 | 1.07 | -0.72 | 0.02 | -1.33 |
| 8.27 | 2.89 | -0.23 | 1.06 | -0.72 | 0.02 | -1.33 |
| 8.28 | 2.92 | -0.23 | 1.04 | -0.72 | 0.02 | -1.33 |
| 8.30 | 3.04 | -0.23 | 1.02 | -0.72 | 0.02 | -1.34 |
| 8.32 | 3.14 | -0.23 | 1.00 | -0.72 | 0.02 | -1.34 |
| 8.33 | 3.06 | -0.23 | 0.98 | -0.72 | 0.02 | -1.34 |
| 8.35 | 2.95 | -0.23 | 0.97 | -0.73 | 0.02 | -1.34 |
| 8.37 | 2.87 | -0.23 | 0.95 | -0.73 | 0.02 | -1.34 |
| 8.38 | 3.01 | -0.23 | 0.94 | -0.73 | 0.02 | -1.34 |
| 8.40 | 3.11 | -0.23 | 0.92 | -0.73 | 0.02 | -1.34 |
| 8.42 | 3.06 | -0.23 | 0.90 | -0.73 | 0.02 | -1.34 |
| 8.43 | 3.00 | -0.23 | 0.89 | -0.73 | 0.02 | -1.34 |
| 8.45 | 2.86 | -0.23 | 0.87 | -0.73 | 0.02 | -1.34 |
| 8.47 | 2.86 | -0.23 | 0.85 | -0.74 | 0.02 | -1.35 |
| 8.48 | 2.98 | -0.23 | 0.84 | -0.74 | 0.02 | -1.35 |
| 8.50 | 2.95 | -0.23 | 0.83 | -0.74 | 0.02 | -1.35 |
| 8.52 | 2.86 | -0.23 | 0.81 | -0.74 | 0.02 | -1.35 |
| 8.53 | 2.91 | -0.23 | 0.80 | -0.74 | 0.02 | -1.35 |
| 8.55 | 2.98 | -0.23 | 0.78 | -0.74 | 0.02 | -1.35 |
| 8.57 | 3.01 | -0.23 | 0.77 | -0.73 | 0.02 | -1.35 |
| 8.58 | 3.01 | -0.23 | 0.75 | -0.74 | 0.02 | -1.35 |
| 8.60 | 2.97 | -0.23 | 0.74 | -0.74 | 0.02 | -1.35 |



|      |      |       |      |       |      |       |
|------|------|-------|------|-------|------|-------|
| 8.62 | 3.03 | -0.23 | 0.73 | -0.74 | 0.02 | -1.35 |
| 8.63 | 3.17 | -0.23 | 0.72 | -0.74 | 0.02 | -1.35 |
| 8.65 | 3.21 | -0.24 | 0.71 | -0.74 | 0.02 | -1.35 |
| 8.67 | 3.18 | -0.24 | 0.69 | -0.74 | 0.02 | -1.35 |
| 8.68 | 3.08 | -0.24 | 0.68 | -0.74 | 0.02 | -1.36 |
| 8.70 | 2.94 | -0.24 | 0.67 | -0.74 | 0.02 | -1.36 |
| 8.72 | 2.97 | -0.24 | 0.66 | -0.75 | 0.02 | -1.36 |
| 8.73 | 3.14 | -0.24 | 0.65 | -0.75 | 0.02 | -1.37 |
| 8.75 | 3.15 | -0.24 | 0.64 | -0.75 | 0.02 | -1.37 |
| 8.77 | 3.21 | -0.24 | 0.63 | -0.75 | 0.02 | -1.37 |
| 8.78 | 3.21 | -0.24 | 0.62 | -0.75 | 0.02 | -1.35 |
| 8.80 | 3.08 | -0.24 | 0.61 | -0.75 | 0.02 | -1.35 |
| 8.82 | 2.97 | -0.24 | 0.60 | -0.75 | 0.02 | -1.37 |
| 8.83 | 2.95 | -0.24 | 0.58 | -0.75 | 0.02 | -1.37 |
| 8.85 | 2.97 | -0.24 | 0.57 | -0.75 | 0.02 | -1.37 |
| 8.87 | 2.92 | -0.24 | 0.56 | -0.76 | 0.02 | -1.37 |
| 8.88 | 2.92 | -0.24 | 0.55 | -0.76 | 0.02 | -1.37 |
| 8.90 | 3.04 | -0.24 | 0.55 | -0.76 | 0.02 | -1.38 |
| 8.92 | 3.15 | -0.24 | 0.54 | -0.76 | 0.02 | -1.38 |
| 8.93 | 3.20 | -0.25 | 0.53 | -0.76 | 0.02 | -1.37 |
| 8.95 | 3.25 | -0.25 | 0.52 | -0.77 | 0.02 | -1.37 |
| 8.97 | 3.32 | -0.24 | 0.51 | -0.77 | 0.02 | -1.37 |
| 8.98 | 3.32 | -0.24 | 0.50 | -0.77 | 0.02 | -1.38 |
| 9.00 | 3.31 | -0.24 | 0.49 | -0.77 | 0.02 | -1.37 |
| 9.02 | 3.32 | -0.24 | 0.49 | -0.77 | 0.02 | -1.37 |
| 9.03 | 3.31 | -0.24 | 0.48 | -0.77 | 0.02 | -1.38 |
| 9.05 | 3.26 | -0.25 | 0.47 | -0.77 | 0.02 | -1.38 |
| 9.07 | 3.17 | -0.24 | 0.46 | -0.77 | 0.02 | -1.38 |
| 9.08 | 3.14 | -0.24 | 0.46 | -0.77 | 0.02 | -1.38 |
| 9.10 | 3.03 | -0.24 | 0.45 | -0.78 | 0.02 | -1.38 |
| 9.12 | 2.92 | -0.24 | 0.44 | -0.78 | 0.02 | -1.38 |
| 9.13 | 3.00 | -0.24 | 0.43 | -0.78 | 0.02 | -1.38 |
| 9.15 | 3.12 | -0.25 | 0.42 | -0.78 | 0.01 | -1.38 |
| 9.17 | 3.08 | -0.25 | 0.42 | -0.78 | 0.02 | -1.38 |
| 9.18 | 3.03 | -0.25 | 0.41 | -0.77 | 0.02 | -1.38 |
| 9.20 | 3.09 | -0.25 | 0.40 | -0.78 | 0.02 | -1.39 |
| 9.22 | 3.09 | -0.25 | 0.40 | -0.78 | 0.02 | -1.39 |
| 9.23 | 3.15 | -0.25 | 0.39 | -0.78 | 0.02 | -1.39 |
| 9.25 | 3.21 | -0.25 | 0.39 | -0.78 | 0.02 | -1.39 |
| 9.27 | 3.21 | -0.25 | 0.38 | -0.78 | 0.02 | -1.39 |
| 9.28 | 3.17 | -0.25 | 0.37 | -0.79 | 0.02 | -1.39 |
| 9.30 | 3.08 | -0.25 | 0.37 | -0.79 | 0.02 | -1.39 |
| 9.32 | 3.12 | -0.25 | 0.36 | -0.79 | 0.02 | -1.40 |
| 9.33 | 3.21 | -0.25 | 0.35 | -0.79 | 0.02 | -1.40 |
| 9.35 | 3.17 | -0.25 | 0.35 | -0.78 | 0.02 | -1.40 |
| 9.37 | 3.17 | -0.25 | 0.34 | -0.78 | 0.02 | -1.39 |
| 9.38 | 3.23 | -0.25 | 0.34 | -0.79 | 0.02 | -1.39 |
| 9.40 | 3.17 | -0.25 | 0.33 | -0.79 | 0.02 | -1.40 |
| 9.42 | 3.06 | -0.25 | 0.33 | -0.79 | 0.02 | -1.40 |
| 9.43 | 3.06 | -0.25 | 0.32 | -0.79 | 0.02 | -1.41 |
| 9.45 | 3.12 | -0.25 | 0.32 | -0.79 | 0.02 | -1.40 |
| 9.47 | 3.20 | -0.25 | 0.31 | -0.79 | 0.02 | -1.39 |
| 9.48 | 3.29 | -0.25 | 0.31 | -0.79 | 0.02 | -1.40 |
| 9.50 | 3.38 | -0.25 | 0.30 | -0.80 | 0.02 | -1.40 |
| 9.52 | 3.37 | -0.25 | 0.29 | -0.80 | 0.02 | -1.41 |
| 9.53 | 3.20 | -0.25 | 0.29 | -0.80 | 0.02 | -1.41 |
| 9.55 | 3.14 | -0.25 | 0.28 | -0.80 | 0.02 | -1.41 |
| 9.57 | 3.21 | -0.25 | 0.28 | -0.80 | 0.02 | -1.40 |
| 9.58 | 3.28 | -0.26 | 0.28 | -0.80 | 0.02 | -1.40 |
| 9.60 | 3.23 | -0.25 | 0.27 | -0.80 | 0.02 | -1.41 |
| 9.62 | 3.20 | -0.25 | 0.27 | -0.81 | 0.02 | -1.41 |
| 9.63 | 3.21 | -0.25 | 0.26 | -0.81 | 0.02 | -1.41 |
| 9.65 | 3.15 | -0.25 | 0.26 | -0.81 | 0.02 | -1.41 |
| 9.67 | 3.06 | -0.25 | 0.26 | -0.81 | 0.02 | -1.41 |
| 9.68 | 3.11 | -0.25 | 0.25 | -0.81 | 0.02 | -1.41 |
| 9.70 | 3.20 | -0.25 | 0.25 | -0.81 | 0.02 | -1.41 |
| 9.72 | 3.23 | -0.25 | 0.24 | -0.81 | 0.02 | -1.41 |
| 9.73 | 3.34 | -0.25 | 0.24 | -0.82 | 0.02 | -1.42 |
| 9.75 | 3.32 | -0.25 | 0.23 | -0.82 | 0.02 | -1.42 |



|       |      |       |      |       |      |       |
|-------|------|-------|------|-------|------|-------|
| 9.77  | 3.11 | -0.25 | 0.23 | -0.82 | 0.02 | -1.42 |
| 9.78  | 3.01 | -0.26 | 0.22 | -0.81 | 0.02 | -1.42 |
| 9.80  | 3.11 | -0.26 | 0.21 | -0.82 | 0.02 | -1.42 |
| 9.82  | 3.21 | -0.26 | 0.21 | -0.82 | 0.02 | -1.42 |
| 9.83  | 3.23 | -0.26 | 0.21 | -0.83 | 0.02 | -1.42 |
| 9.85  | 3.14 | -0.26 | 0.21 | -0.83 | 0.01 | -1.42 |
| 9.87  | 3.15 | -0.26 | 0.21 | -0.83 | 0.01 | -1.42 |
| 9.88  | 3.31 | -0.26 | 0.20 | -0.83 | 0.01 | -1.43 |
| 9.90  | 3.28 | -0.26 | 0.20 | -0.83 | 0.01 | -1.43 |
| 9.92  | 3.17 | -0.26 | 0.20 | -0.83 | 0.01 | -1.42 |
| 9.93  | 3.29 | -0.26 | 0.19 | -0.83 | 0.01 | -1.42 |
| 9.95  | 3.37 | -0.26 | 0.19 | -0.83 | 0.01 | -1.42 |
| 9.97  | 3.34 | -0.25 | 0.19 | -0.83 | 0.01 | -1.43 |
| 9.98  | 3.32 | -0.25 | 0.18 | -0.84 | 0.01 | -1.43 |
| 10.00 | 3.32 | -0.26 | 0.18 | -0.84 | 0.02 | -1.43 |
| 10.02 | 3.25 | -0.26 | 0.18 | -0.83 | 0.02 | -1.43 |
| 10.03 | 3.25 | -0.26 | 0.17 | -0.84 | 0.01 | -1.44 |
| 10.05 | 3.21 | -0.26 | 0.17 | -0.84 | 0.01 | -1.44 |
| 10.07 | 3.17 | -0.26 | 0.17 | -0.84 | 0.01 | -1.44 |
| 10.08 | 3.23 | -0.26 | 0.17 | -0.84 | 0.01 | -1.44 |
| 10.10 | 3.18 | -0.26 | 0.16 | -0.84 | 0.01 | -1.44 |
| 10.12 | 3.17 | -0.26 | 0.16 | -0.84 | 0.02 | -1.44 |
| 10.13 | 3.32 | -0.26 | 0.15 | -0.85 | 0.02 | -1.44 |
| 10.15 | 3.32 | -0.27 | 0.15 | -0.85 | 0.01 | -1.44 |
| 10.17 | 3.14 | -0.27 | 0.15 | -0.85 | 0.01 | -1.44 |
| 10.18 | 3.06 | -0.26 | 0.14 | -0.85 | 0.01 | -1.44 |
| 10.20 | 3.15 | -0.26 | 0.14 | -0.85 | 0.01 | -1.44 |
| 10.22 | 3.31 | -0.26 | 0.14 | -0.85 | 0.01 | -1.44 |
| 10.23 | 3.35 | -0.26 | 0.14 | -0.86 | 0.01 | -1.44 |
| 10.25 | 3.29 | -0.26 | 0.14 | -0.86 | 0.01 | -1.44 |
| 10.27 | 3.25 | -0.26 | 0.13 | -0.86 | 0.01 | -1.45 |
| 10.28 | 3.23 | -0.26 | 0.13 | -0.86 | 0.01 | -1.44 |
| 10.30 | 3.31 | -0.26 | 0.13 | -0.86 | 0.01 | -1.44 |
| 10.32 | 3.37 | -0.26 | 0.13 | -0.86 | 0.01 | -1.45 |
| 10.33 | 3.43 | -0.26 | 0.12 | -0.87 | 0.01 | -1.45 |
| 10.35 | 3.43 | -0.26 | 0.12 | -0.87 | 0.01 | -1.45 |
| 10.37 | 3.34 | -0.26 | 0.12 | -0.87 | 0.01 | -1.45 |
| 10.38 | 3.28 | -0.26 | 0.12 | -0.87 | 0.01 | -1.45 |
| 10.40 | 3.29 | -0.26 | 0.11 | -0.88 | 0.01 | -1.44 |
| 10.42 | 3.31 | -0.26 | 0.11 | -0.88 | 0.01 | -1.45 |
| 10.43 | 3.32 | -0.27 | 0.11 | -0.88 | 0.01 | -1.45 |
| 10.45 | 3.46 | -0.27 | 0.11 | -0.88 | 0.01 | -1.45 |
| 10.47 | 3.43 | -0.27 | 0.11 | -0.88 | 0.01 | -1.46 |
| 10.48 | 3.31 | -0.27 | 0.10 | -0.88 | 0.01 | -1.46 |
| 10.50 | 3.35 | -0.26 | 0.10 | -0.89 | 0.01 | -1.46 |
| 10.52 | 3.32 | -0.27 | 0.10 | -0.89 | 0.01 | -1.46 |
| 10.53 | 3.26 | -0.27 | 0.10 | -0.89 | 0.01 | -1.45 |
| 10.55 | 3.37 | -0.27 | 0.10 | -0.89 | 0.01 | -1.45 |
| 10.57 | 3.48 | -0.27 | 0.09 | -0.89 | 0.01 | -1.46 |
| 10.58 | 3.38 | -0.27 | 0.09 | -0.89 | 0.01 | -1.46 |
| 10.60 | 3.28 | -0.27 | 0.09 | -0.89 | 0.01 | -1.46 |
| 10.62 | 3.38 | -0.26 | 0.08 | -0.89 | 0.01 | -1.46 |
| 10.63 | 3.49 | -0.26 | 0.09 | -0.90 | 0.01 | -1.46 |
| 10.65 | 3.48 | -0.26 | 0.08 | -0.90 | 0.01 | -1.46 |
| 10.67 | 3.48 | -0.26 | 0.08 | -0.90 | 0.01 | -1.45 |
| 10.68 | 3.45 | -0.27 | 0.08 | -0.90 | 0.01 | -1.45 |
| 10.70 | 3.38 | -0.27 | 0.08 | -0.90 | 0.01 | -1.46 |
| 10.72 | 3.42 | -0.27 | 0.07 | -0.90 | 0.01 | -1.46 |
| 10.73 | 3.48 | -0.27 | 0.07 | -0.91 | 0.01 | -1.46 |
| 10.75 | 3.42 | -0.27 | 0.07 | -0.91 | 0.01 | -1.46 |
| 10.77 | 3.35 | -0.27 | 0.07 | -0.91 | 0.01 | -1.47 |
| 10.78 | 3.43 | -0.27 | 0.07 | -0.91 | 0.01 | -1.47 |
| 10.80 | 3.52 | -0.27 | 0.07 | -0.91 | 0.01 | -1.46 |
| 10.82 | 3.46 | -0.27 | 0.07 | -0.91 | 0.01 | -1.46 |
| 10.83 | 3.31 | -0.27 | 0.06 | -0.91 | 0.01 | -1.46 |
| 10.85 | 3.21 | -0.27 | 0.06 | -0.91 | 0.01 | -1.46 |
| 10.87 | 3.25 | -0.27 | 0.06 | -0.91 | 0.01 | -1.47 |
| 10.88 | 3.31 | -0.27 | 0.06 | -0.91 | 0.01 | -1.47 |
| 10.90 | 3.26 | -0.27 | 0.06 | -0.91 | 0.01 | -1.47 |



|       |      |       |      |       |      |       |
|-------|------|-------|------|-------|------|-------|
| 10.92 | 3.17 | -0.27 | 0.06 | -0.91 | 0.01 | -1.47 |
| 10.93 | 3.12 | -0.27 | 0.05 | -0.91 | 0.01 | -1.47 |
| 10.95 | 3.23 | -0.27 | 0.05 | -0.91 | 0.01 | -1.47 |
| 10.97 | 3.26 | -0.27 | 0.05 | -0.91 | 0.01 | -1.47 |
| 10.98 | 3.28 | -0.28 | 0.05 | -0.91 | 0.01 | -1.48 |
| 11.00 | 3.40 | -0.28 | 0.05 | -0.91 | 0.01 | -1.47 |
| 11.02 | 3.45 | -0.28 | 0.05 | -0.91 | 0.01 | -1.47 |
| 11.03 | 3.54 | -0.27 | 0.05 | -0.91 | 0.01 | -1.48 |
| 11.05 | 3.59 | -0.27 | 0.05 | -0.90 | 0.01 | -1.48 |
| 11.07 | 3.51 | -0.28 | 0.04 | -0.90 | 0.01 | -1.48 |
| 11.08 | 3.40 | -0.28 | 0.04 | -0.89 | 0.01 | -1.48 |
| 11.10 | 3.38 | -0.27 | 0.04 | -0.88 | 0.01 | -1.48 |
| 11.12 | 3.32 | -0.27 | 0.04 | -0.87 | 0.01 | -1.48 |
| 11.13 | 3.28 | -0.27 | 0.04 | -0.86 | 0.01 | -1.48 |
| 11.15 | 3.35 | -0.27 | 0.04 | -0.86 | 0.01 | -1.48 |
| 11.17 | 3.37 | -0.27 | 0.04 | -0.85 | 0.01 | -1.48 |
| 11.18 | 3.32 | -0.27 | 0.04 | -0.83 | 0.01 | -1.48 |
| 11.20 | 3.31 | -0.27 | 0.04 | -0.82 | 0.01 | -1.48 |
| 11.22 | 3.29 | -0.27 | 0.03 | -0.80 | 0.01 | -1.47 |
| 11.23 | 3.34 | -0.28 | 0.03 | -0.79 | 0.02 | -1.48 |
| 11.25 | 3.42 | -0.28 | 0.03 | -0.77 | 0.02 | -1.48 |
| 11.27 | 3.49 | -0.28 | 0.03 | -0.76 | 0.01 | -1.48 |
| 11.28 | 3.54 | -0.28 | 0.03 | -0.75 | 0.01 | -1.48 |
| 11.30 | 3.46 | -0.28 | 0.03 | -0.75 | 0.01 | -1.49 |
| 11.32 | 3.37 | -0.28 | 0.03 | -0.74 | 0.01 | -1.49 |
| 11.33 | 3.31 | -0.28 | 0.03 | -0.73 | 0.01 | -1.48 |
| 11.35 | 3.32 | -0.28 | 0.02 | -0.73 | 0.01 | -1.48 |
| 11.37 | 3.37 | -0.28 | 0.02 | -0.73 | 0.01 | -1.47 |
| 11.38 | 3.32 | -0.28 | 0.02 | -0.73 | 0.01 | -1.47 |
| 11.40 | 3.37 | -0.28 | 0.02 | -0.73 | 0.01 | -1.48 |
| 11.42 | 3.42 | -0.28 | 0.02 | -0.73 | 0.01 | -1.49 |
| 11.43 | 3.37 | -0.28 | 0.02 | -0.73 | 0.01 | -1.49 |
| 11.45 | 3.34 | -0.28 | 0.02 | -0.73 | 0.01 | -1.49 |
| 11.47 | 3.38 | -0.28 | 0.02 | -0.73 | 0.01 | -1.49 |
| 11.48 | 3.48 | -0.28 | 0.02 | -0.73 | 0.01 | -1.49 |
| 11.50 | 3.48 | -0.28 | 0.02 | -0.72 | 0.01 | -1.49 |
| 11.52 | 3.45 | -0.28 | 0.02 | -0.72 | 0.01 | -1.48 |
| 11.53 | 3.51 | -0.28 | 0.02 | -0.73 | 0.01 | -1.49 |
| 11.55 | 3.54 | -0.28 | 0.01 | -0.73 | 0.01 | -1.50 |
| 11.57 | 3.51 | -0.28 | 0.01 | -0.73 | 0.01 | -1.49 |
| 11.58 | 3.42 | -0.28 | 0.01 | -0.74 | 0.01 | -1.49 |
| 11.60 | 3.37 | -0.28 | 0.01 | -0.74 | 0.01 | -1.48 |
| 11.62 | 3.42 | -0.28 | 0.01 | -0.74 | 0.01 | -1.48 |
| 11.63 | 3.51 | -0.28 | 0.01 | -0.75 | 0.01 | -1.48 |
| 11.65 | 3.48 | -0.28 | 0.01 | -0.75 | 0.01 | -1.48 |
| 11.67 | 3.49 | -0.28 | 0.01 | -0.75 | 0.01 | -1.48 |
| 11.68 | 3.60 | -0.28 | 0.00 | -0.75 | 0.01 | -1.49 |
| 11.70 | 3.55 | -0.29 | 0.00 | -0.76 | 0.01 | -1.50 |
| 11.72 | 3.43 | -0.28 | 0.01 | -0.75 | 0.01 | -1.49 |
| 11.73 | 3.52 | -0.28 | 0.01 | -0.76 | 0.01 | -1.49 |
| 11.75 | 3.65 | -0.28 | 0.01 | -0.76 | 0.01 | -1.49 |
| 11.77 | 3.55 | -0.28 | 0.01 | -0.76 | 0.01 | -1.49 |
| 11.78 | 3.45 | -0.28 | 0.01 | -0.76 | 0.01 | -1.50 |
| 11.80 | 3.48 | -0.29 | 0.01 | -0.76 | 0.01 | -1.50 |
| 11.82 | 3.54 | -0.28 | 0.01 | -0.76 | 0.01 | -1.50 |
| 11.83 | 3.60 | -0.28 | 0.00 | -0.76 | 0.01 | -1.49 |
| 11.85 | 3.59 | -0.29 | 0.00 | -0.75 | 0.01 | -1.49 |
| 11.87 | 3.54 | -0.29 | 0.00 | -0.75 | 0.01 | -1.49 |
| 11.88 | 3.38 | -0.28 | 0.00 | -0.75 | 0.01 | -1.50 |
| 11.90 | 3.34 | -0.28 | 0.00 | -0.75 | 0.01 | -1.50 |
| 11.92 | 3.51 | -0.28 | 0.00 | -0.75 | 0.01 | -1.50 |
| 11.93 | 3.55 | -0.28 | 0.00 | -0.75 | 0.01 | -1.51 |
| 11.95 | 3.45 | -0.28 | 0.00 | -0.75 | 0.01 | -1.50 |
| 11.97 | 3.45 | -0.28 | 0.00 | -0.74 | 0.01 | -1.50 |
| 11.98 | 3.51 | -0.28 | 0.00 | -0.74 | 0.01 | -1.50 |
| 12.00 | 3.48 | -0.28 | 0.00 | -0.74 | 0.01 | -1.50 |
| 12.02 | 3.38 | -0.28 | 0.00 | -0.74 | 0.01 | -1.50 |
| 12.03 | 3.51 | -0.28 | 0.00 | -0.74 | 0.01 | -1.50 |
| 12.05 | 3.79 | -0.28 | 0.00 | -0.74 | 0.01 | -1.50 |



|       |      |       |       |       |      |       |
|-------|------|-------|-------|-------|------|-------|
| 12.07 | 3.88 | -0.28 | 0.00  | -0.74 | 0.01 | -1.50 |
| 12.08 | 3.76 | -0.29 | 0.00  | -0.75 | 0.01 | -1.50 |
| 12.10 | 3.69 | -0.29 | 0.00  | -0.75 | 0.01 | -1.50 |
| 12.12 | 3.62 | -0.29 | 0.00  | -0.75 | 0.01 | -1.50 |
| 12.13 | 3.38 | -0.28 | 0.00  | -0.75 | 0.01 | -1.50 |
| 12.15 | 3.35 | -0.28 | 0.00  | -0.75 | 0.01 | -1.50 |
| 12.17 | 3.55 | -0.28 | 0.00  | -0.75 | 0.01 | -1.50 |
| 12.18 | 3.65 | -0.28 | 0.00  | -0.75 | 0.01 | -1.50 |
| 12.20 | 3.62 | -0.28 | 0.00  | -0.75 | 0.01 | -1.50 |
| 12.22 | 3.62 | -0.28 | 0.00  | -0.75 | 0.01 | -1.51 |
| 12.23 | 3.60 | -0.28 | 0.00  | -0.76 | 0.01 | -1.51 |
| 12.25 | 3.49 | -0.28 | 0.00  | -0.76 | 0.01 | -1.51 |
| 12.27 | 3.43 | -0.28 | 0.00  | -0.77 | 0.01 | -1.51 |
| 12.28 | 3.49 | -0.28 | -0.01 | -0.77 | 0.01 | -1.51 |
| 12.30 | 3.59 | -0.28 | -0.01 | -0.77 | 0.01 | -1.51 |
| 12.32 | 3.60 | -0.28 | -0.01 | -0.77 | 0.01 | -1.51 |
| 12.33 | 3.59 | -0.28 | 0.00  | -0.78 | 0.01 | -1.51 |
| 12.35 | 3.57 | -0.29 | 0.00  | -0.78 | 0.01 | -1.51 |
| 12.37 | 3.51 | -0.29 | 0.00  | -0.78 | 0.01 | -1.52 |
| 12.38 | 3.40 | -0.29 | 0.00  | -0.79 | 0.01 | -1.52 |
| 12.40 | 3.45 | -0.29 | 0.00  | -0.79 | 0.01 | -1.51 |
| 12.42 | 3.65 | -0.28 | 0.00  | -0.79 | 0.01 | -1.51 |
| 12.43 | 3.71 | -0.28 | 0.00  | -0.80 | 0.01 | -1.51 |
| 12.45 | 3.59 | -0.28 | 0.00  | -0.80 | 0.01 | -1.50 |
| 12.47 | 3.51 | -0.28 | 0.00  | -0.80 | 0.01 | -1.50 |
| 12.48 | 3.60 | -0.29 | 0.00  | -0.80 | 0.01 | -1.50 |
| 12.50 | 3.60 | -0.29 | 0.00  | -0.80 | 0.01 | -1.51 |
| 12.52 | 3.57 | -0.29 | 0.00  | -0.81 | 0.01 | -1.51 |
| 12.53 | 3.62 | -0.29 | 0.00  | -0.81 | 0.01 | -1.51 |
| 12.55 | 3.59 | -0.28 | 0.00  | -0.82 | 0.01 | -1.50 |
| 12.57 | 3.49 | -0.28 | 0.00  | -0.82 | 0.01 | -1.50 |
| 12.58 | 3.57 | -0.29 | 0.00  | -0.81 | 0.01 | -1.51 |
| 12.60 | 3.71 | -0.29 | 0.00  | -0.81 | 0.01 | -1.51 |
| 12.62 | 3.69 | -0.28 | 0.00  | -0.82 | 0.01 | -1.51 |
| 12.63 | 3.59 | -0.29 | 0.00  | -0.82 | 0.01 | -1.50 |
| 12.65 | 3.66 | -0.29 | 0.00  | -0.83 | 0.01 | -1.50 |
| 12.67 | 3.82 | -0.29 | 0.00  | -0.83 | 0.01 | -1.50 |
| 12.68 | 3.74 | -0.28 | 0.00  | -0.83 | 0.01 | -1.51 |
| 12.70 | 3.62 | -0.28 | 0.01  | -0.83 | 0.01 | -1.51 |
| 12.72 | 3.65 | -0.29 | 0.01  | -0.84 | 0.01 | -1.52 |
| 12.73 | 3.68 | -0.29 | 0.01  | -0.84 | 0.01 | -1.51 |
| 12.75 | 3.71 | -0.29 | 0.01  | -0.84 | 0.01 | -1.51 |
| 12.77 | 3.76 | -0.29 | 0.01  | -0.85 | 0.01 | -1.51 |
| 12.78 | 3.76 | -0.28 | 0.01  | -0.85 | 0.01 | -1.51 |
| 12.80 | 3.72 | -0.29 | 0.01  | -0.85 | 0.01 | -1.51 |
| 12.82 | 3.72 | -0.29 | 0.01  | -0.85 | 0.01 | -1.51 |
| 12.83 | 3.69 | -0.29 | 0.01  | -0.86 | 0.01 | -1.51 |
| 12.85 | 3.60 | -0.29 | 0.01  | -0.86 | 0.01 | -1.51 |
| 12.87 | 3.51 | -0.29 | 0.01  | -0.86 | 0.01 | -1.51 |
| 12.88 | 3.49 | -0.29 | 0.01  | -0.86 | 0.01 | -1.51 |
| 12.90 | 3.62 | -0.29 | 0.01  | -0.86 | 0.01 | -1.51 |
| 12.92 | 3.68 | -0.29 | 0.01  | -0.87 | 0.01 | -1.52 |
| 12.93 | 3.71 | -0.29 | 0.02  | -0.87 | 0.01 | -1.52 |
| 12.95 | 3.72 | -0.29 | 0.02  | -0.87 | 0.01 | -1.52 |
| 12.97 | 3.63 | -0.29 | 0.02  | -0.88 | 0.01 | -1.52 |
| 12.98 | 3.49 | -0.29 | 0.02  | -0.88 | 0.01 | -1.51 |
| 13.00 | 3.51 | -0.29 | 0.02  | -0.88 | 0.01 | -1.51 |
| 13.02 | 3.69 | -0.29 | 0.02  | -0.88 | 0.01 | -1.52 |
| 13.03 | 3.76 | -0.29 | 0.02  | -0.89 | 0.01 | -1.52 |
| 13.05 | 3.71 | -0.29 | 0.02  | -0.89 | 0.01 | -1.52 |
| 13.07 | 3.69 | -0.29 | 0.03  | -0.89 | 0.01 | -1.52 |
| 13.08 | 3.63 | -0.29 | 0.03  | -0.89 | 0.01 | -1.51 |
| 13.10 | 3.62 | -0.29 | 0.03  | -0.90 | 0.01 | -1.52 |
| 13.12 | 3.65 | -0.29 | 0.03  | -0.90 | 0.01 | -1.51 |
| 13.13 | 3.62 | -0.29 | 0.03  | -0.91 | 0.02 | -1.51 |
| 13.15 | 3.62 | -0.29 | 0.03  | -0.91 | 0.02 | -1.52 |
| 13.17 | 3.72 | -0.28 | 0.03  | -0.91 | 0.02 | -1.52 |
| 13.18 | 3.80 | -0.29 | 0.03  | -0.92 | 0.01 | -1.52 |
| 13.20 | 3.79 | -0.29 | 0.04  | -0.92 | 0.02 | -1.52 |



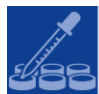

|       |      |       |      |       |      |       |
|-------|------|-------|------|-------|------|-------|
| 13.22 | 3.79 | -0.29 | 0.04 | -0.92 | 0.01 | -1.52 |
| 13.23 | 3.80 | -0.29 | 0.04 | -0.92 | 0.01 | -1.52 |
| 13.25 | 3.82 | -0.29 | 0.04 | -0.93 | 0.01 | -1.52 |
| 13.27 | 3.74 | -0.29 | 0.04 | -0.94 | 0.01 | -1.52 |
| 13.28 | 3.60 | -0.29 | 0.05 | -0.94 | 0.01 | -1.52 |
| 13.30 | 3.49 | -0.29 | 0.05 | -0.94 | 0.01 | -1.51 |
| 13.32 | 3.65 | -0.29 | 0.05 | -0.94 | 0.01 | -1.51 |
| 13.33 | 3.79 | -0.29 | 0.05 | -0.95 | 0.01 | -1.52 |
| 13.35 | 3.79 | -0.29 | 0.05 | -0.95 | 0.01 | -1.53 |
| 13.37 | 3.82 | -0.29 | 0.05 | -0.95 | 0.01 | -1.53 |
| 13.38 | 3.88 | -0.29 | 0.05 | -0.95 | 0.01 | -1.52 |
| 13.40 | 3.86 | -0.29 | 0.05 | -0.95 | 0.01 | -1.51 |
| 13.42 | 3.79 | -0.29 | 0.06 | -0.96 | 0.01 | -1.52 |
| 13.43 | 3.68 | -0.29 | 0.06 | -0.96 | 0.01 | -1.52 |
| 13.45 | 3.54 | -0.29 | 0.06 | -0.97 | 0.01 | -1.53 |
| 13.47 | 3.54 | -0.29 | 0.06 | -0.97 | 0.01 | -1.52 |
| 13.48 | 3.69 | -0.29 | 0.06 | -0.97 | 0.01 | -1.52 |
| 13.50 | 3.83 | -0.29 | 0.06 | -0.97 | 0.01 | -1.52 |
| 13.52 | 3.85 | -0.29 | 0.06 | -0.97 | 0.01 | -1.52 |
| 13.53 | 3.79 | -0.29 | 0.06 | -0.98 | 0.01 | -1.52 |
| 13.55 | 3.80 | -0.29 | 0.06 | -0.98 | 0.01 | -1.52 |
| 13.57 | 3.94 | -0.28 | 0.07 | -0.98 | 0.01 | -1.52 |
| 13.58 | 4.02 | -0.29 | 0.07 | -0.97 | 0.01 | -1.53 |
| 13.60 | 4.00 | -0.29 | 0.07 | -0.98 | 0.01 | -1.53 |
| 13.62 | 4.02 | -0.29 | 0.07 | -0.99 | 0.01 | -1.52 |
| 13.63 | 3.97 | -0.29 | 0.07 | -0.99 | 0.01 | -1.53 |
| 13.65 | 3.97 | -0.29 | 0.07 | -0.99 | 0.01 | -1.53 |
| 13.67 | 4.02 | -0.29 | 0.07 | -0.99 | 0.01 | -1.52 |
| 13.68 | 4.00 | -0.29 | 0.08 | -0.99 | 0.01 | -1.52 |
| 13.70 | 3.99 | -0.29 | 0.08 | -1.00 | 0.01 | -1.52 |
| 13.72 | 3.91 | -0.29 | 0.08 | -1.00 | 0.01 | -1.53 |
| 13.73 | 3.83 | -0.30 | 0.08 | -1.00 | 0.01 | -1.52 |
| 13.75 | 3.82 | -0.29 | 0.08 | -1.00 | 0.01 | -1.52 |
| 13.77 | 3.82 | -0.29 | 0.08 | -1.00 | 0.01 | -1.52 |
| 13.78 | 3.93 | -0.29 | 0.08 | -1.00 | 0.01 | -1.52 |
| 13.80 | 4.00 | -0.29 | 0.08 | -0.99 | 0.01 | -1.52 |
| 13.82 | 3.94 | -0.29 | 0.09 | -1.00 | 0.01 | -1.52 |
| 13.83 | 3.86 | -0.29 | 0.09 | -1.00 | 0.01 | -1.52 |
| 13.85 | 3.97 | -0.29 | 0.09 | -1.00 | 0.01 | -1.52 |
| 13.87 | 3.99 | -0.29 | 0.09 | -1.00 | 0.01 | -1.53 |
| 13.88 | 3.85 | -0.29 | 0.09 | -1.00 | 0.01 | -1.53 |
| 13.90 | 3.85 | -0.29 | 0.09 | -1.01 | 0.01 | -1.53 |
| 13.92 | 3.86 | -0.29 | 0.09 | -1.01 | 0.01 | -1.53 |
| 13.93 | 3.79 | -0.29 | 0.09 | -1.01 | 0.01 | -1.53 |
| 13.95 | 3.74 | -0.29 | 0.09 | -1.01 | 0.01 | -1.52 |
| 13.97 | 3.83 | -0.29 | 0.09 | -1.01 | 0.01 | -1.52 |
| 13.98 | 3.91 | -0.29 | 0.09 | -1.01 | 0.01 | -1.52 |
| 14.00 | 4.05 | -0.29 | 0.09 | -1.01 | 0.01 | -1.52 |
| 14.02 | 4.06 | -0.29 | 0.09 | -1.02 | 0.01 | -1.53 |
| 14.03 | 4.03 | -0.29 | 0.09 | -1.01 | 0.01 | -1.52 |
| 14.05 | 4.00 | -0.29 | 0.10 | -1.01 | 0.01 | -1.52 |
| 14.07 | 4.03 | -0.29 | 0.10 | -1.01 | 0.01 | -1.53 |
| 14.08 | 4.06 | -0.30 | 0.10 | -1.02 | 0.01 | -1.54 |
| 14.10 | 4.00 | -0.30 | 0.09 | -1.02 | 0.01 | -1.54 |
| 14.12 | 3.88 | -0.29 | 0.10 | -1.01 | 0.01 | -1.53 |
| 14.13 | 3.79 | -0.29 | 0.10 | -1.02 | 0.01 | -1.52 |
| 14.15 | 3.85 | -0.29 | 0.10 | -1.02 | 0.02 | -1.52 |
| 14.17 | 4.00 | -0.29 | 0.10 | -1.02 | 0.01 | -1.53 |
| 14.18 | 3.99 | -0.29 | 0.09 | -1.02 | 0.01 | -1.54 |
| 14.20 | 3.89 | -0.30 | 0.10 | -1.02 | 0.01 | -1.54 |
| 14.22 | 3.94 | -0.30 | 0.10 | -1.02 | 0.01 | -1.53 |
| 14.23 | 4.00 | -0.30 | 0.10 | -1.02 | 0.01 | -1.53 |
| 14.25 | 3.91 | -0.29 | 0.10 | -1.02 | 0.01 | -1.53 |
| 14.27 | 3.99 | -0.29 | 0.10 | -1.02 | 0.01 | -1.53 |
| 14.28 | 4.16 | -0.29 | 0.10 | -1.02 | 0.01 | -1.53 |
| 14.30 | 4.23 | -0.29 | 0.10 | -1.02 | 0.01 | -1.53 |
| 14.32 | 4.23 | -0.29 | 0.10 | -1.02 | 0.01 | -1.53 |
| 14.33 | 4.20 | -0.29 | 0.10 | -1.02 | 0.01 | -1.53 |
| 14.35 | 4.11 | -0.29 | 0.10 | -1.03 | 0.01 | -1.53 |



|       |      |       |      |       |      |       |
|-------|------|-------|------|-------|------|-------|
| 14.37 | 4.05 | -0.29 | 0.10 | -1.03 | 0.01 | -1.53 |
| 14.38 | 4.08 | -0.29 | 0.10 | -1.03 | 0.01 | -1.53 |
| 14.40 | 4.08 | -0.29 | 0.09 | -1.03 | 0.01 | -1.54 |
| 14.42 | 4.05 | -0.29 | 0.09 | -1.03 | 0.01 | -1.54 |
| 14.43 | 4.06 | -0.29 | 0.09 | -1.02 | 0.01 | -1.53 |
| 14.45 | 4.14 | -0.29 | 0.09 | -1.03 | 0.01 | -1.53 |
| 14.47 | 4.17 | -0.29 | 0.09 | -1.03 | 0.01 | -1.53 |
| 14.48 | 4.20 | -0.29 | 0.09 | -1.03 | 0.01 | -1.53 |
| 14.50 | 4.23 | -0.30 | 0.09 | -1.03 | 0.01 | -1.54 |
| 14.52 | 4.30 | -0.30 | 0.09 | -1.03 | 0.01 | -1.54 |
| 14.53 | 4.36 | -0.30 | 0.09 | -1.03 | 0.01 | -1.53 |
| 14.55 | 4.30 | -0.30 | 0.09 | -1.03 | 0.01 | -1.52 |
| 14.57 | 4.16 | -0.30 | 0.09 | -1.03 | 0.01 | -1.52 |
| 14.58 | 4.02 | -0.29 | 0.09 | -1.03 | 0.01 | -1.53 |
| 14.60 | 4.05 | -0.30 | 0.09 | -1.03 | 0.01 | -1.53 |
| 14.62 | 4.16 | -0.30 | 0.09 | -1.03 | 0.01 | -1.54 |
| 14.63 | 4.10 | -0.30 | 0.09 | -1.03 | 0.01 | -1.55 |
| 14.65 | 3.96 | -0.29 | 0.09 | -1.03 | 0.01 | -1.54 |
| 14.67 | 4.02 | -0.29 | 0.09 | -1.03 | 0.01 | -1.53 |
| 14.68 | 4.16 | -0.30 | 0.08 | -1.03 | 0.01 | -1.53 |
| 14.70 | 4.19 | -0.30 | 0.08 | -1.03 | 0.01 | -1.54 |
| 14.72 | 4.25 | -0.30 | 0.08 | -1.03 | 0.01 | -1.54 |
| 14.73 | 4.25 | -0.30 | 0.08 | -1.03 | 0.01 | -1.54 |
| 14.75 | 4.19 | -0.30 | 0.08 | -1.03 | 0.01 | -1.54 |
| 14.77 | 4.19 | -0.29 | 0.08 | -1.03 | 0.01 | -1.54 |
| 14.78 | 4.17 | -0.29 | 0.08 | -1.03 | 0.01 | -1.54 |
| 14.80 | 4.06 | -0.29 | 0.08 | -1.03 | 0.01 | -1.54 |
| 14.82 | 3.99 | -0.29 | 0.08 | -1.03 | 0.01 | -1.54 |
| 14.83 | 4.08 | -0.30 | 0.07 | -1.03 | 0.01 | -1.54 |
| 14.85 | 4.25 | -0.30 | 0.07 | -1.03 | 0.01 | -1.54 |
| 14.87 | 4.31 | -0.29 | 0.07 | -1.03 | 0.01 | -1.54 |
| 14.88 | 4.25 | -0.29 | 0.07 | -1.03 | 0.01 | -1.54 |
| 14.90 | 4.16 | -0.30 | 0.07 | -1.03 | 0.01 | -1.54 |
| 14.92 | 4.11 | -0.30 | 0.07 | -1.03 | 0.01 | -1.54 |
| 14.93 | 4.14 | -0.29 | 0.07 | -1.03 | 0.01 | -1.54 |
| 14.95 | 4.23 | -0.29 | 0.06 | -1.03 | 0.01 | -1.54 |
| 14.97 | 4.34 | -0.29 | 0.06 | -1.03 | 0.01 | -1.54 |
| 14.98 | 4.47 | -0.30 | 0.06 | -1.03 | 0.01 | -1.54 |
| 15.00 | 4.39 | -0.30 | 0.06 | -1.03 | 0.01 | -1.55 |
| 15.02 | 4.28 | -0.30 | 0.06 | -1.03 | 0.01 | -1.54 |
| 15.03 | 4.27 | -0.30 | 0.06 | -1.03 | 0.01 | -1.54 |
| 15.05 | 4.25 | -0.30 | 0.06 | -1.03 | 0.01 | -1.54 |
| 15.07 | 4.33 | -0.30 | 0.06 | -1.03 | 0.01 | -1.53 |
| 15.08 | 4.42 | -0.30 | 0.05 | -1.03 | 0.01 | -1.53 |
| 15.10 | 4.39 | -0.30 | 0.05 | -1.03 | 0.01 | -1.54 |
| 15.12 | 4.40 | -0.30 | 0.05 | -1.03 | 0.01 | -1.54 |
| 15.13 | 4.48 | -0.30 | 0.05 | -1.03 | 0.01 | -1.54 |
| 15.15 | 4.44 | -0.30 | 0.05 | -1.02 | 0.01 | -1.54 |
| 15.17 | 4.31 | -0.30 | 0.05 | -1.03 | 0.01 | -1.54 |
| 15.18 | 4.31 | -0.30 | 0.05 | -1.02 | 0.01 | -1.54 |
| 15.20 | 4.40 | -0.30 | 0.04 | -1.02 | 0.01 | -1.54 |
| 15.22 | 4.47 | -0.30 | 0.04 | -1.01 | 0.01 | -1.54 |
| 15.23 | 4.50 | -0.30 | 0.04 | -1.01 | 0.01 | -1.55 |
| 15.25 | 4.61 | -0.30 | 0.04 | -1.01 | 0.01 | -1.55 |
| 15.27 | 4.65 | -0.30 | 0.04 | -1.01 | 0.01 | -1.54 |
| 15.28 | 4.65 | -0.30 | 0.04 | -1.01 | 0.01 | -1.54 |
| 15.30 | 4.59 | -0.30 | 0.04 | -1.01 | 0.01 | -1.54 |
| 15.32 | 4.47 | -0.30 | 0.04 | -1.01 | 0.01 | -1.54 |
| 15.33 | 4.51 | -0.30 | 0.04 | -1.01 | 0.01 | -1.55 |
| 15.35 | 4.61 | -0.30 | 0.04 | -1.01 | 0.01 | -1.55 |
| 15.37 | 4.62 | -0.30 | 0.04 | -1.01 | 0.01 | -1.55 |
| 15.38 | 4.61 | -0.30 | 0.03 | -1.01 | 0.01 | -1.55 |
| 15.40 | 4.57 | -0.29 | 0.03 | -1.01 | 0.01 | -1.54 |
| 15.42 | 4.56 | -0.29 | 0.03 | -1.00 | 0.01 | -1.54 |
| 15.43 | 4.62 | -0.29 | 0.03 | -1.00 | 0.01 | -1.54 |
| 15.45 | 4.56 | -0.29 | 0.03 | -1.00 | 0.01 | -1.54 |
| 15.47 | 4.42 | -0.30 | 0.03 | -1.00 | 0.01 | -1.55 |
| 15.48 | 4.42 | -0.30 | 0.02 | -1.00 | 0.01 | -1.54 |
| 15.50 | 4.59 | -0.29 | 0.03 | -1.00 | 0.01 | -1.54 |



|       |      |       |       |       |      |       |
|-------|------|-------|-------|-------|------|-------|
| 15.52 | 4.70 | -0.29 | 0.02  | -1.00 | 0.01 | -1.55 |
| 15.53 | 4.62 | -0.30 | 0.02  | -1.00 | 0.01 | -1.54 |
| 15.55 | 4.62 | -0.30 | 0.02  | -1.00 | 0.01 | -1.54 |
| 15.57 | 4.62 | -0.30 | 0.02  | -1.00 | 0.01 | -1.55 |
| 15.58 | 4.57 | -0.30 | 0.02  | -0.99 | 0.01 | -1.55 |
| 15.60 | 4.64 | -0.30 | 0.02  | -0.99 | 0.01 | -1.55 |
| 15.62 | 4.70 | -0.30 | 0.02  | -0.99 | 0.01 | -1.55 |
| 15.63 | 4.73 | -0.30 | 0.01  | -0.99 | 0.01 | -1.55 |
| 15.65 | 4.68 | -0.30 | 0.01  | -0.99 | 0.01 | -1.54 |
| 15.67 | 4.64 | -0.29 | 0.02  | -0.99 | 0.01 | -1.55 |
| 15.68 | 4.70 | -0.29 | 0.02  | -0.99 | 0.01 | -1.55 |
| 15.70 | 4.74 | -0.29 | 0.01  | -0.99 | 0.01 | -1.55 |
| 15.72 | 4.70 | -0.29 | 0.01  | -0.99 | 0.01 | -1.55 |
| 15.73 | 4.78 | -0.30 | 0.01  | -0.99 | 0.01 | -1.55 |
| 15.75 | 4.76 | -0.30 | 0.01  | -0.99 | 0.01 | -1.54 |
| 15.77 | 4.70 | -0.30 | 0.01  | -0.99 | 0.01 | -1.54 |
| 15.78 | 4.67 | -0.30 | 0.01  | -0.99 | 0.01 | -1.55 |
| 15.80 | 4.61 | -0.30 | 0.01  | -0.99 | 0.01 | -1.55 |
| 15.82 | 4.68 | -0.30 | 0.01  | -0.98 | 0.01 | -1.55 |
| 15.83 | 4.84 | -0.30 | 0.00  | -0.99 | 0.01 | -1.55 |
| 15.85 | 4.87 | -0.30 | 0.00  | -0.99 | 0.01 | -1.55 |
| 15.87 | 4.82 | -0.30 | 0.00  | -0.98 | 0.01 | -1.55 |
| 15.88 | 4.79 | -0.30 | 0.00  | -0.98 | 0.01 | -1.55 |
| 15.90 | 4.81 | -0.30 | 0.00  | -0.98 | 0.01 | -1.55 |
| 15.92 | 4.87 | -0.30 | 0.00  | -0.98 | 0.01 | -1.55 |
| 15.93 | 4.93 | -0.29 | 0.00  | -0.98 | 0.01 | -1.55 |
| 15.95 | 4.91 | -0.29 | 0.00  | -0.99 | 0.01 | -1.55 |
| 15.97 | 4.88 | -0.30 | 0.00  | -0.98 | 0.01 | -1.55 |
| 15.98 | 4.84 | -0.30 | 0.00  | -0.98 | 0.01 | -1.54 |
| 16.00 | 4.74 | -0.30 | -0.01 | -0.99 | 0.01 | -1.54 |
| 16.02 | 4.74 | -0.30 | -0.01 | -0.99 | 0.01 | -1.55 |
| 16.03 | 4.82 | -0.30 | -0.01 | -0.99 | 0.02 | -1.56 |
| 16.05 | 4.82 | -0.30 | -0.01 | -0.98 | 0.01 | -1.55 |
| 16.07 | 4.82 | -0.30 | -0.01 | -0.98 | 0.01 | -1.55 |
| 16.08 | 4.82 | -0.30 | -0.01 | -0.98 | 0.02 | -1.56 |
| 16.10 | 4.85 | -0.30 | -0.01 | -0.98 | 0.02 | -1.55 |
| 16.12 | 4.87 | -0.29 | -0.01 | -0.98 | 0.02 | -1.55 |
| 16.13 | 4.79 | -0.30 | -0.01 | -0.98 | 0.02 | -1.55 |
| 16.15 | 4.76 | -0.30 | -0.01 | -0.98 | 0.02 | -1.55 |
| 16.17 | 4.95 | -0.30 | -0.01 | -0.98 | 0.02 | -1.55 |
| 16.18 | 4.99 | -0.30 | -0.01 | -0.98 | 0.02 | -1.56 |
| 16.20 | 4.82 | -0.30 | -0.02 | -0.98 | 0.02 | -1.56 |
| 16.22 | 4.67 | -0.30 | -0.02 | -0.98 | 0.02 | -1.55 |
| 16.23 | 4.70 | -0.30 | -0.01 | -0.98 | 0.02 | -1.55 |
| 16.25 | 4.87 | -0.30 | -0.02 | -0.98 | 0.02 | -1.54 |
| 16.27 | 4.88 | -0.30 | -0.02 | -0.98 | 0.02 | -1.54 |
| 16.28 | 4.84 | -0.30 | -0.02 | -0.98 | 0.02 | -1.55 |
| 16.30 | 4.98 | -0.30 | -0.02 | -0.98 | 0.02 | -1.55 |
| 16.32 | 5.02 | -0.30 | -0.02 | -0.98 | 0.02 | -1.55 |
| 16.33 | 4.96 | -0.30 | -0.02 | -0.99 | 0.02 | -1.55 |
| 16.35 | 5.02 | -0.30 | -0.02 | -0.99 | 0.02 | -1.55 |
| 16.37 | 5.04 | -0.30 | -0.02 | -0.99 | 0.02 | -1.55 |
| 16.38 | 4.91 | -0.30 | -0.02 | -0.99 | 0.02 | -1.55 |
| 16.40 | 4.78 | -0.30 | -0.02 | -0.99 | 0.02 | -1.55 |
| 16.42 | 4.79 | -0.30 | -0.02 | -0.99 | 0.02 | -1.56 |
| 16.43 | 4.88 | -0.30 | -0.02 | -0.99 | 0.02 | -1.56 |
| 16.45 | 4.88 | -0.29 | -0.02 | -0.99 | 0.02 | -1.56 |
| 16.47 | 4.87 | -0.29 | -0.02 | -0.99 | 0.02 | -1.55 |
| 16.48 | 4.85 | -0.30 | -0.02 | -0.99 | 0.02 | -1.55 |
| 16.50 | 4.79 | -0.30 | -0.02 | -0.99 | 0.02 | -1.55 |
| 16.52 | 4.68 | -0.30 | -0.03 | -0.99 | 0.02 | -1.56 |
| 16.53 | 4.70 | -0.30 | -0.03 | -0.99 | 0.02 | -1.56 |
| 16.55 | 4.73 | -0.30 | -0.03 | -1.00 | 0.02 | -1.56 |
| 16.57 | 4.81 | -0.30 | -0.03 | -1.00 | 0.02 | -1.55 |
| 16.58 | 4.99 | -0.30 | -0.03 | -1.00 | 0.02 | -1.55 |
| 16.60 | 5.04 | -0.30 | -0.03 | -1.00 | 0.02 | -1.55 |
| 16.62 | 5.02 | -0.30 | -0.03 | -1.00 | 0.02 | -1.55 |
| 16.63 | 4.98 | -0.30 | -0.03 | -1.00 | 0.02 | -1.55 |
| 16.65 | 4.91 | -0.30 | -0.03 | -1.00 | 0.02 | -1.55 |



|       |      |       |       |       |      |       |
|-------|------|-------|-------|-------|------|-------|
| 16.67 | 4.79 | -0.30 | -0.03 | -1.00 | 0.02 | -1.55 |
| 16.68 | 4.71 | -0.30 | -0.03 | -1.00 | 0.02 | -1.55 |
| 16.70 | 4.65 | -0.30 | -0.03 | -1.00 | 0.02 | -1.55 |
| 16.72 | 4.70 | -0.30 | -0.03 | -1.00 | 0.02 | -1.54 |
| 16.73 | 4.84 | -0.30 | -0.03 | -1.00 | 0.02 | -1.54 |
| 16.75 | 4.90 | -0.30 | -0.03 | -1.00 | 0.02 | -1.55 |
| 16.77 | 4.96 | -0.30 | -0.03 | -1.00 | 0.02 | -1.56 |
| 16.78 | 4.98 | -0.30 | -0.03 | -1.00 | 0.02 | -1.55 |
| 16.80 | 4.87 | -0.30 | -0.03 | -1.01 | 0.02 | -1.55 |
| 16.82 | 4.87 | -0.30 | -0.03 | -1.01 | 0.02 | -1.55 |
| 16.83 | 4.90 | -0.30 | -0.03 | -1.01 | 0.02 | -1.55 |
| 16.85 | 4.78 | -0.30 | -0.03 | -1.01 | 0.02 | -1.55 |
| 16.87 | 4.70 | -0.30 | -0.03 | -1.01 | 0.02 | -1.54 |
| 16.88 | 4.81 | -0.30 | -0.03 | -1.01 | 0.02 | -1.55 |
| 16.90 | 4.95 | -0.30 | -0.04 | -1.01 | 0.02 | -1.55 |
| 16.92 | 4.93 | -0.30 | -0.03 | -1.01 | 0.02 | -1.55 |
| 16.93 | 4.81 | -0.30 | -0.03 | -1.01 | 0.02 | -1.55 |
| 16.95 | 4.84 | -0.31 | -0.04 | -1.01 | 0.02 | -1.55 |
| 16.97 | 5.01 | -0.30 | -0.04 | -1.01 | 0.02 | -1.55 |
| 16.98 | 5.13 | -0.30 | -0.04 | -1.01 | 0.02 | -1.55 |
| 17.00 | 5.09 | -0.30 | -0.04 | -1.01 | 0.02 | -1.54 |
| 17.02 | 4.93 | -0.30 | -0.04 | -1.01 | 0.02 | -1.55 |
| 17.03 | 4.87 | -0.30 | -0.04 | -1.01 | 0.02 | -1.55 |
| 17.05 | 4.82 | -0.30 | -0.04 | -1.02 | 0.02 | -1.55 |
| 17.07 | 4.76 | -0.30 | -0.04 | -1.02 | 0.02 | -1.55 |
| 17.08 | 4.79 | -0.30 | -0.04 | -1.02 | 0.02 | -1.55 |
| 17.10 | 4.82 | -0.30 | -0.04 | -1.02 | 0.02 | -1.55 |
| 17.12 | 4.78 | -0.30 | -0.04 | -1.02 | 0.02 | -1.55 |
| 17.13 | 4.76 | -0.30 | -0.04 | -1.03 | 0.02 | -1.56 |
| 17.15 | 4.82 | -0.30 | -0.04 | -1.03 | 0.02 | -1.56 |
| 17.17 | 4.76 | -0.30 | -0.04 | -1.02 | 0.02 | -1.56 |
| 17.18 | 4.73 | -0.30 | -0.04 | -1.03 | 0.02 | -1.55 |
| 17.20 | 4.81 | -0.30 | -0.04 | -1.03 | 0.02 | -1.54 |
| 17.22 | 4.81 | -0.30 | -0.04 | -1.03 | 0.02 | -1.54 |
| 17.23 | 4.85 | -0.30 | -0.04 | -1.04 | 0.02 | -1.54 |
| 17.25 | 4.93 | -0.30 | -0.04 | -1.04 | 0.02 | -1.54 |
| 17.27 | 4.82 | -0.30 | -0.04 | -1.03 | 0.02 | -1.54 |
| 17.28 | 4.74 | -0.30 | -0.04 | -1.03 | 0.02 | -1.54 |
| 17.30 | 4.76 | -0.30 | -0.04 | -1.03 | 0.02 | -1.55 |
| 17.32 | 4.64 | -0.30 | -0.04 | -1.04 | 0.02 | -1.55 |
| 17.33 | 4.61 | -0.30 | -0.04 | -1.04 | 0.02 | -1.55 |
| 17.35 | 4.59 | -0.30 | -0.05 | -1.04 | 0.02 | -1.55 |
| 17.37 | 4.56 | -0.30 | -0.04 | -1.04 | 0.02 | -1.55 |
| 17.38 | 4.59 | -0.30 | -0.04 | -1.04 | 0.02 | -1.55 |
| 17.40 | 4.67 | -0.30 | -0.04 | -1.04 | 0.02 | -1.55 |
| 17.42 | 4.78 | -0.30 | -0.05 | -1.04 | 0.02 | -1.56 |
| 17.43 | 4.82 | -0.30 | -0.05 | -1.05 | 0.02 | -1.56 |
| 17.45 | 4.74 | -0.31 | -0.05 | -1.05 | 0.02 | -1.55 |
| 17.47 | 4.81 | -0.31 | -0.05 | -1.05 | 0.02 | -1.55 |
| 17.48 | 4.85 | -0.30 | -0.05 | -1.05 | 0.02 | -1.54 |
| 17.50 | 4.65 | -0.31 | -0.05 | -1.05 | 0.02 | -1.54 |
| 17.52 | 4.53 | -0.31 | -0.05 | -1.05 | 0.02 | -1.54 |
| 17.53 | 4.61 | -0.30 | -0.05 | -1.05 | 0.02 | -1.55 |
| 17.55 | 4.53 | -0.30 | -0.05 | -1.05 | 0.02 | -1.55 |
| 17.57 | 4.54 | -0.30 | -0.05 | -1.05 | 0.02 | -1.55 |
| 17.58 | 4.68 | -0.30 | -0.05 | -1.05 | 0.02 | -1.55 |
| 17.60 | 4.64 | -0.30 | -0.05 | -1.06 | 0.02 | -1.56 |
| 17.62 | 4.59 | -0.30 | -0.05 | -1.06 | 0.02 | -1.55 |
| 17.63 | 4.50 | -0.30 | -0.05 | -1.06 | 0.02 | -1.55 |
| 17.65 | 4.47 | -0.31 | -0.05 | -1.06 | 0.02 | -1.54 |
| 17.67 | 4.61 | -0.31 | -0.05 | -1.06 | 0.01 | -1.54 |
| 17.68 | 4.65 | -0.31 | -0.05 | -1.06 | 0.02 | -1.54 |
| 17.70 | 4.57 | -0.30 | -0.05 | -1.06 | 0.02 | -1.54 |
| 17.72 | 4.54 | -0.30 | -0.05 | -1.06 | 0.02 | -1.54 |
| 17.73 | 4.56 | -0.31 | -0.05 | -1.06 | 0.02 | -1.54 |
| 17.75 | 4.56 | -0.31 | -0.05 | -1.07 | 0.02 | -1.55 |
| 17.77 | 4.53 | -0.31 | -0.05 | -1.07 | 0.02 | -1.55 |
| 17.78 | 4.45 | -0.31 | -0.05 | -1.07 | 0.02 | -1.54 |
| 17.80 | 4.42 | -0.30 | -0.05 | -1.07 | 0.02 | -1.53 |



|       |      |       |       |       |      |       |
|-------|------|-------|-------|-------|------|-------|
| 17.82 | 4.40 | -0.30 | -0.05 | -1.07 | 0.02 | -1.53 |
| 17.83 | 4.48 | -0.31 | -0.05 | -1.07 | 0.02 | -1.53 |
| 17.85 | 4.68 | -0.31 | -0.05 | -1.07 | 0.02 | -1.54 |
| 17.87 | 4.74 | -0.31 | -0.05 | -1.08 | 0.02 | -1.54 |
| 17.88 | 4.65 | -0.31 | -0.05 | -1.08 | 0.02 | -1.54 |
| 17.90 | 4.48 | -0.31 | -0.05 | -1.08 | 0.02 | -1.54 |
| 17.92 | 4.39 | -0.30 | -0.05 | -1.08 | 0.02 | -1.54 |
| 17.93 | 4.48 | -0.30 | -0.05 | -1.08 | 0.02 | -1.54 |
| 17.95 | 4.51 | -0.30 | -0.05 | -1.08 | 0.02 | -1.54 |
| 17.97 | 4.37 | -0.30 | -0.05 | -1.08 | 0.02 | -1.54 |
| 17.98 | 4.33 | -0.30 | -0.05 | -1.09 | 0.02 | -1.54 |
| 18.00 | 4.37 | -0.31 | -0.05 | -1.09 | 0.02 | -1.54 |
| 18.02 | 4.39 | -0.31 | -0.05 | -1.09 | 0.02 | -1.53 |
| 18.03 | 4.39 | -0.31 | -0.05 | -1.09 | 0.02 | -1.53 |
| 18.05 | 4.44 | -0.30 | -0.05 | -1.09 | 0.02 | -1.54 |
| 18.07 | 4.56 | -0.30 | -0.05 | -1.09 | 0.02 | -1.54 |
| 18.08 | 4.65 | -0.30 | -0.05 | -1.09 | 0.02 | -1.54 |
| 18.10 | 4.61 | -0.30 | -0.05 | -1.09 | 0.02 | -1.54 |
| 18.12 | 4.39 | -0.30 | -0.05 | -1.10 | 0.02 | -1.54 |
| 18.13 | 4.22 | -0.31 | -0.05 | -1.09 | 0.02 | -1.53 |
| 18.15 | 4.33 | -0.31 | -0.05 | -1.10 | 0.02 | -1.53 |
| 18.17 | 4.50 | -0.30 | -0.05 | -1.10 | 0.02 | -1.53 |
| 18.18 | 4.44 | -0.30 | -0.05 | -1.10 | 0.02 | -1.53 |
| 18.20 | 4.33 | -0.30 | -0.05 | -1.10 | 0.02 | -1.53 |
| 18.22 | 4.30 | -0.30 | -0.05 | -1.10 | 0.02 | -1.53 |
| 18.23 | 4.36 | -0.31 | -0.05 | -1.10 | 0.02 | -1.53 |
| 18.25 | 4.40 | -0.31 | -0.05 | -1.10 | 0.02 | -1.54 |
| 18.27 | 4.39 | -0.31 | -0.05 | -1.10 | 0.02 | -1.53 |
| 18.28 | 4.44 | -0.31 | -0.05 | -1.10 | 0.02 | -1.53 |
| 18.30 | 4.39 | -0.31 | -0.05 | -1.10 | 0.02 | -1.53 |
| 18.32 | 4.28 | -0.31 | -0.05 | -1.10 | 0.02 | -1.53 |
| 18.33 | 4.23 | -0.30 | -0.05 | -1.10 | 0.02 | -1.53 |
| 18.35 | 4.23 | -0.30 | -0.05 | -1.10 | 0.02 | -1.52 |
| 18.37 | 4.33 | -0.30 | -0.05 | -1.10 | 0.02 | -1.53 |
| 18.38 | 4.50 | -0.30 | -0.05 | -1.11 | 0.02 | -1.53 |
| 18.40 | 4.57 | -0.30 | -0.05 | -1.11 | 0.02 | -1.53 |
| 18.42 | 4.51 | -0.30 | -0.05 | -1.11 | 0.02 | -1.53 |
| 18.43 | 4.45 | -0.31 | -0.05 | -1.11 | 0.02 | -1.53 |
| 18.45 | 4.50 | -0.31 | -0.05 | -1.11 | 0.02 | -1.53 |
| 18.47 | 4.45 | -0.31 | -0.05 | -1.11 | 0.02 | -1.52 |
| 18.48 | 4.37 | -0.31 | -0.05 | -1.11 | 0.02 | -1.53 |
| 18.50 | 4.40 | -0.31 | -0.05 | -1.11 | 0.02 | -1.53 |
| 18.52 | 4.44 | -0.31 | -0.05 | -1.11 | 0.02 | -1.53 |
| 18.53 | 4.47 | -0.30 | -0.05 | -1.12 | 0.02 | -1.53 |
| 18.55 | 4.54 | -0.30 | -0.05 | -1.12 | 0.02 | -1.53 |
| 18.57 | 4.64 | -0.30 | -0.05 | -1.12 | 0.02 | -1.52 |
| 18.58 | 4.56 | -0.30 | -0.05 | -1.12 | 0.02 | -1.52 |
| 18.60 | 4.42 | -0.31 | -0.05 | -1.12 | 0.02 | -1.53 |
| 18.62 | 4.34 | -0.31 | -0.05 | -1.12 | 0.02 | -1.53 |
| 18.63 | 4.37 | -0.30 | -0.05 | -1.12 | 0.02 | -1.53 |
| 18.65 | 4.48 | -0.30 | -0.05 | -1.12 | 0.02 | -1.52 |
| 18.67 | 4.56 | -0.31 | -0.05 | -1.12 | 0.02 | -1.52 |
| 18.68 | 4.65 | -0.31 | -0.04 | -1.12 | 0.02 | -1.52 |
| 18.70 | 4.67 | -0.31 | -0.05 | -1.12 | 0.02 | -1.53 |
| 18.72 | 4.59 | -0.31 | -0.05 | -1.12 | 0.02 | -1.53 |
| 18.73 | 4.50 | -0.31 | -0.05 | -1.12 | 0.02 | -1.53 |
| 18.75 | 4.42 | -0.30 | -0.05 | -1.12 | 0.02 | -1.52 |
| 18.77 | 4.36 | -0.30 | -0.04 | -1.12 | 0.02 | -1.52 |
| 18.78 | 4.33 | -0.30 | -0.05 | -1.13 | 0.02 | -1.52 |
| 18.80 | 4.34 | -0.31 | -0.05 | -1.13 | 0.02 | -1.52 |
| 18.82 | 4.23 | -0.31 | -0.05 | -1.13 | 0.02 | -1.52 |
| 18.83 | 4.14 | -0.31 | -0.04 | -1.13 | 0.02 | -1.52 |
| 18.85 | 4.23 | -0.31 | -0.04 | -1.12 | 0.02 | -1.52 |
| 18.87 | 4.37 | -0.30 | -0.04 | -1.12 | 0.02 | -1.52 |
| 18.88 | 4.48 | -0.30 | -0.04 | -1.13 | 0.02 | -1.51 |
| 18.90 | 4.50 | -0.31 | -0.04 | -1.13 | 0.02 | -1.51 |
| 18.92 | 4.45 | -0.31 | -0.04 | -1.13 | 0.02 | -1.52 |
| 18.93 | 4.45 | -0.31 | -0.04 | -1.13 | 0.02 | -1.51 |
| 18.95 | 4.44 | -0.31 | -0.04 | -1.13 | 0.02 | -1.51 |



|       |      |       |       |       |      |       |
|-------|------|-------|-------|-------|------|-------|
| 18.97 | 4.37 | -0.31 | -0.04 | -1.13 | 0.02 | -1.50 |
| 18.98 | 4.30 | -0.31 | -0.04 | -1.13 | 0.02 | -1.50 |
| 19.00 | 4.28 | -0.31 | -0.04 | -1.13 | 0.02 | -1.50 |
| 19.02 | 4.37 | -0.31 | -0.04 | -1.13 | 0.02 | -1.51 |
| 19.03 | 4.50 | -0.31 | -0.04 | -1.14 | 0.02 | -1.52 |
| 19.05 | 4.51 | -0.31 | -0.04 | -1.14 | 0.02 | -1.52 |
| 19.07 | 4.44 | -0.31 | -0.04 | -1.14 | 0.02 | -1.51 |
| 19.08 | 4.45 | -0.31 | -0.04 | -1.14 | 0.02 | -1.52 |
| 19.10 | 4.57 | -0.31 | -0.04 | -1.14 | 0.02 | -1.51 |
| 19.12 | 4.62 | -0.31 | -0.04 | -1.14 | 0.02 | -1.51 |
| 19.13 | 4.64 | -0.31 | -0.04 | -1.14 | 0.02 | -1.51 |
| 19.15 | 4.57 | -0.30 | -0.04 | -1.14 | 0.02 | -1.51 |
| 19.17 | 4.57 | -0.31 | -0.04 | -1.14 | 0.01 | -1.51 |
| 19.18 | 4.59 | -0.31 | -0.04 | -1.14 | 0.01 | -1.51 |
| 19.20 | 4.45 | -0.31 | -0.04 | -1.14 | 0.02 | -1.51 |
| 19.22 | 4.33 | -0.31 | -0.04 | -1.14 | 0.02 | -1.50 |
| 19.23 | 4.31 | -0.31 | -0.04 | -1.14 | 0.02 | -1.51 |
| 19.25 | 4.37 | -0.31 | -0.04 | -1.14 | 0.02 | -1.52 |
| 19.27 | 4.39 | -0.31 | -0.04 | -1.14 | 0.02 | -1.51 |
| 19.28 | 4.31 | -0.31 | -0.04 | -1.14 | 0.02 | -1.51 |
| 19.30 | 4.27 | -0.31 | -0.04 | -1.15 | 0.02 | -1.50 |
| 19.32 | 4.23 | -0.31 | -0.04 | -1.15 | 0.02 | -1.50 |
| 19.33 | 4.30 | -0.31 | -0.04 | -1.15 | 0.02 | -1.49 |
| 19.35 | 4.44 | -0.31 | -0.03 | -1.14 | 0.01 | -1.50 |
| 19.37 | 4.37 | -0.31 | -0.03 | -1.15 | 0.01 | -1.51 |
| 19.38 | 4.25 | -0.31 | -0.03 | -1.15 | 0.01 | -1.50 |
| 19.40 | 4.25 | -0.31 | -0.03 | -1.15 | 0.01 | -1.50 |
| 19.42 | 4.37 | -0.30 | -0.03 | -1.15 | 0.01 | -1.50 |
| 19.43 | 4.45 | -0.30 | -0.03 | -1.15 | 0.01 | -1.50 |
| 19.45 | 4.51 | -0.31 | -0.03 | -1.15 | 0.02 | -1.50 |
| 19.47 | 4.53 | -0.31 | -0.03 | -1.15 | 0.02 | -1.50 |
| 19.48 | 4.54 | -0.31 | -0.03 | -1.15 | 0.02 | -1.50 |
| 19.50 | 4.61 | -0.31 | -0.03 | -1.15 | 0.01 | -1.50 |
| 19.52 | 4.54 | -0.31 | -0.03 | -1.15 | 0.01 | -1.49 |
| 19.53 | 4.53 | -0.31 | -0.03 | -1.15 | 0.02 | -1.49 |
| 19.55 | 4.50 | -0.31 | -0.03 | -1.15 | 0.01 | -1.49 |
| 19.57 | 4.40 | -0.31 | -0.03 | -1.15 | 0.01 | -1.49 |
| 19.58 | 4.42 | -0.31 | -0.03 | -1.15 | 0.02 | -1.49 |
| 19.60 | 4.48 | -0.31 | -0.03 | -1.15 | 0.02 | -1.50 |
| 19.62 | 4.59 | -0.31 | -0.03 | -1.15 | 0.02 | -1.50 |
| 19.63 | 4.62 | -0.31 | -0.03 | -1.15 | 0.02 | -1.49 |
| 19.65 | 4.42 | -0.31 | -0.03 | -1.16 | 0.02 | -1.49 |
| 19.67 | 4.22 | -0.31 | -0.03 | -1.16 | 0.01 | -1.49 |
| 19.68 | 4.22 | -0.31 | -0.02 | -1.15 | 0.01 | -1.49 |
| 19.70 | 4.39 | -0.31 | -0.02 | -1.15 | 0.01 | -1.49 |
| 19.72 | 4.56 | -0.30 | -0.02 | -1.15 | 0.01 | -1.49 |
| 19.73 | 4.53 | -0.31 | -0.02 | -1.16 | 0.02 | -1.49 |
| 19.75 | 4.44 | -0.31 | -0.02 | -1.16 | 0.02 | -1.49 |
| 19.77 | 4.39 | -0.31 | -0.02 | -1.16 | 0.02 | -1.49 |
| 19.78 | 4.33 | -0.30 | -0.02 | -1.15 | 0.01 | -1.49 |
| 19.80 | 4.36 | -0.31 | -0.02 | -1.16 | 0.01 | -1.48 |
| 19.82 | 4.47 | -0.31 | -0.02 | -1.16 | 0.01 | -1.48 |
| 19.83 | 4.40 | -0.31 | -0.02 | -1.16 | 0.01 | -1.47 |
| 19.85 | 4.31 | -0.31 | -0.02 | -1.16 | 0.01 | -1.48 |
| 19.87 | 4.34 | -0.31 | -0.02 | -1.16 | 0.01 | -1.48 |
| 19.88 | 4.42 | -0.31 | -0.02 | -1.16 | 0.01 | -1.48 |
| 19.90 | 4.51 | -0.31 | -0.02 | -1.16 | 0.01 | -1.48 |
| 19.92 | 4.57 | -0.31 | -0.02 | -1.16 | 0.02 | -1.47 |
| 19.93 | 4.56 | -0.31 | -0.02 | -1.16 | 0.02 | -1.47 |
| 19.95 | 4.48 | -0.31 | -0.02 | -1.16 | 0.02 | -1.47 |
| 19.97 | 4.53 | -0.31 | -0.02 | -1.16 | 0.02 | -1.47 |
| 19.98 | 4.56 | -0.31 | -0.02 | -1.17 | 0.01 | -1.48 |
| 20.00 | 4.47 | -0.31 | -0.02 | -1.17 | 0.01 | -1.47 |
| 20.02 | 4.47 | -0.31 | -0.02 | -1.16 | 0.01 | -1.47 |
| 20.03 | 4.40 | -0.31 | -0.02 | -1.17 | 0.01 | -1.47 |
| 20.05 | 4.36 | -0.30 | -0.02 | -1.17 | 0.01 | -1.47 |
| 20.07 | 4.51 | -0.31 | -0.02 | -1.17 | 0.01 | -1.48 |
| 20.08 | 4.62 | -0.31 | -0.02 | -1.16 | 0.02 | -1.48 |
| 20.10 | 4.67 | -0.31 | -0.02 | -1.16 | 0.01 | -1.48 |



|       |      |       |       |       |      |       |
|-------|------|-------|-------|-------|------|-------|
| 20.12 | 4.62 | -0.31 | -0.02 | -1.16 | 0.01 | -1.47 |
| 20.13 | 4.56 | -0.31 | -0.02 | -1.16 | 0.01 | -1.47 |
| 20.15 | 4.54 | -0.31 | -0.02 | -1.17 | 0.02 | -1.47 |
| 20.17 | 4.51 | -0.31 | -0.02 | -1.17 | 0.01 | -1.47 |
| 20.18 | 4.42 | -0.31 | -0.02 | -1.17 | 0.01 | -1.46 |
| 20.20 | 4.42 | -0.31 | -0.02 | -1.17 | 0.01 | -1.47 |
| 20.22 | 4.53 | -0.31 | -0.02 | -1.17 | 0.01 | -1.47 |
| 20.23 | 4.56 | -0.31 | -0.02 | -1.17 | 0.01 | -1.47 |
| 20.25 | 4.59 | -0.31 | -0.02 | -1.17 | 0.01 | -1.47 |
| 20.27 | 4.57 | -0.31 | -0.02 | -1.17 | 0.01 | -1.47 |
| 20.28 | 4.45 | -0.31 | -0.02 | -1.17 | 0.01 | -1.47 |
| 20.30 | 4.40 | -0.31 | -0.02 | -1.17 | 0.01 | -1.46 |
| 20.32 | 4.42 | -0.31 | -0.02 | -1.16 | 0.01 | -1.46 |
| 20.33 | 4.40 | -0.31 | -0.02 | -1.16 | 0.02 | -1.46 |
| 20.35 | 4.39 | -0.31 | -0.02 | -1.16 | 0.02 | -1.46 |
| 20.37 | 4.42 | -0.31 | -0.02 | -1.17 | 0.02 | -1.47 |
| 20.38 | 4.42 | -0.31 | -0.02 | -1.17 | 0.01 | -1.47 |
| 20.40 | 4.39 | -0.31 | -0.02 | -1.17 | 0.01 | -1.46 |
| 20.42 | 4.45 | -0.31 | -0.02 | -1.17 | 0.01 | -1.46 |
| 20.43 | 4.57 | -0.31 | -0.02 | -1.17 | 0.01 | -1.46 |
| 20.45 | 4.74 | -0.31 | -0.02 | -1.17 | 0.01 | -1.46 |
| 20.47 | 4.84 | -0.31 | -0.02 | -1.17 | 0.01 | -1.46 |
| 20.48 | 4.73 | -0.31 | -0.02 | -1.18 | 0.01 | -1.45 |
| 20.50 | 4.62 | -0.31 | -0.02 | -1.17 | 0.01 | -1.45 |
| 20.52 | 4.61 | -0.31 | -0.02 | -1.17 | 0.02 | -1.45 |
| 20.53 | 4.56 | -0.31 | -0.02 | -1.17 | 0.02 | -1.46 |
| 20.55 | 4.56 | -0.31 | -0.02 | -1.17 | 0.02 | -1.46 |
| 20.57 | 4.54 | -0.31 | -0.02 | -1.17 | 0.01 | -1.45 |
| 20.58 | 4.45 | -0.31 | -0.02 | -1.17 | 0.01 | -1.45 |
| 20.60 | 4.48 | -0.31 | -0.02 | -1.17 | 0.02 | -1.45 |
| 20.62 | 4.50 | -0.31 | -0.03 | -1.17 | 0.02 | -1.45 |
| 20.63 | 4.42 | -0.31 | -0.03 | -1.17 | 0.02 | -1.45 |
| 20.65 | 4.44 | -0.31 | -0.03 | -1.17 | 0.02 | -1.45 |
| 20.67 | 4.54 | -0.31 | -0.02 | -1.17 | 0.02 | -1.45 |
| 20.68 | 4.62 | -0.31 | -0.02 | -1.17 | 0.02 | -1.45 |
| 20.70 | 4.54 | -0.31 | -0.02 | -1.17 | 0.03 | -1.44 |
| 20.72 | 4.44 | -0.31 | -0.02 | -1.17 | 0.03 | -1.44 |
| 20.73 | 4.45 | -0.30 | -0.03 | -1.17 | 0.03 | -1.44 |
| 20.75 | 4.40 | -0.30 | -0.03 | -1.17 | 0.03 | -1.43 |
| 20.77 | 4.36 | -0.31 | -0.03 | -1.17 | 0.04 | -1.43 |
| 20.78 | 4.47 | -0.31 | -0.02 | -1.18 | 0.04 | -1.43 |
| 20.80 | 4.50 | -0.30 | -0.03 | -1.17 | 0.05 | -1.43 |
| 20.82 | 4.39 | -0.30 | -0.03 | -1.17 | 0.06 | -1.43 |
| 20.83 | 4.39 | -0.30 | -0.03 | -1.17 | 0.06 | -1.43 |
| 20.85 | 4.47 | -0.30 | -0.03 | -1.17 | 0.07 | -1.43 |
| 20.87 | 4.54 | -0.31 | -0.03 | -1.17 | 0.08 | -1.43 |
| 20.88 | 4.62 | -0.31 | -0.03 | -1.18 | 0.09 | -1.43 |
| 20.90 | 4.61 | -0.31 | -0.03 | -1.18 | 0.10 | -1.43 |
| 20.92 | 4.54 | -0.31 | -0.03 | -1.18 | 0.11 | -1.43 |
| 20.93 | 4.48 | -0.31 | -0.03 | -1.17 | 0.12 | -1.43 |
| 20.95 | 4.45 | -0.31 | -0.03 | -1.17 | 0.14 | -1.42 |
| 20.97 | 4.48 | -0.31 | -0.03 | -1.17 | 0.16 | -1.42 |
| 20.98 | 4.51 | -0.31 | -0.03 | -1.18 | 0.18 | -1.42 |
| 21.00 | 4.51 | -0.31 | -0.03 | -1.18 | 0.20 | -1.43 |
| 21.02 | 4.48 | -0.31 | -0.03 | -1.18 | 0.23 | -1.43 |
| 21.03 | 4.47 | -0.31 | -0.03 | -1.18 | 0.26 | -1.43 |
| 21.05 | 4.54 | -0.31 | -0.03 | -1.18 | 0.29 | -1.42 |
| 21.07 | 4.57 | -0.31 | -0.03 | -1.18 | 0.33 | -1.42 |
| 21.08 | 4.48 | -0.31 | -0.03 | -1.18 | 0.37 | -1.42 |
| 21.10 | 4.47 | -0.31 | -0.03 | -1.18 | 0.42 | -1.42 |
| 21.12 | 4.54 | -0.31 | -0.03 | -1.17 | 0.48 | -1.42 |
| 21.13 | 4.59 | -0.31 | -0.03 | -1.17 | 0.54 | -1.42 |
| 21.15 | 4.44 | -0.31 | -0.04 | -1.17 | 0.61 | -1.41 |
| 21.17 | 4.39 | -0.31 | -0.04 | -1.17 | 0.69 | -1.40 |
| 21.18 | 4.53 | -0.31 | -0.04 | -1.18 | 0.77 | -1.40 |
| 21.20 | 4.59 | -0.31 | -0.04 | -1.18 | 0.87 | -1.41 |
| 21.22 | 4.51 | -0.31 | -0.04 | -1.18 | 0.98 | -1.41 |
| 21.23 | 4.51 | -0.31 | -0.04 | -1.17 | 1.10 | -1.41 |
| 21.25 | 4.62 | -0.31 | -0.04 | -1.17 | 1.23 | -1.41 |



|       |      |       |       |       |       |       |
|-------|------|-------|-------|-------|-------|-------|
| 21.27 | 4.68 | -0.31 | -0.04 | -1.17 | 1.38  | -1.41 |
| 21.28 | 4.54 | -0.31 | -0.04 | -1.17 | 1.54  | -1.41 |
| 21.30 | 4.37 | -0.31 | -0.04 | -1.17 | 1.72  | -1.40 |
| 21.32 | 4.44 | -0.31 | -0.04 | -1.17 | 1.92  | -1.40 |
| 21.33 | 4.53 | -0.31 | -0.04 | -1.17 | 2.13  | -1.40 |
| 21.35 | 4.57 | -0.31 | -0.04 | -1.17 | 2.36  | -1.40 |
| 21.37 | 4.64 | -0.31 | -0.04 | -1.18 | 2.62  | -1.40 |
| 21.38 | 4.68 | -0.31 | -0.04 | -1.18 | 2.89  | -1.40 |
| 21.40 | 4.65 | -0.31 | -0.04 | -1.18 | 3.18  | -1.40 |
| 21.42 | 4.59 | -0.31 | -0.04 | -1.17 | 3.50  | -1.40 |
| 21.43 | 4.51 | -0.31 | -0.04 | -1.17 | 3.84  | -1.40 |
| 21.45 | 4.50 | -0.31 | -0.05 | -1.17 | 4.20  | -1.39 |
| 21.47 | 4.54 | -0.31 | -0.04 | -1.17 | 4.59  | -1.39 |
| 21.48 | 4.47 | -0.31 | -0.04 | -1.17 | 5.01  | -1.40 |
| 21.50 | 4.37 | -0.31 | -0.04 | -1.17 | 5.45  | -1.40 |
| 21.52 | 4.48 | -0.31 | -0.04 | -1.17 | 5.92  | -1.39 |
| 21.53 | 4.50 | -0.31 | -0.04 | -1.17 | 6.41  | -1.39 |
| 21.55 | 4.53 | -0.31 | -0.05 | -1.17 | 6.92  | -1.38 |
| 21.57 | 4.62 | -0.31 | -0.05 | -1.17 | 7.46  | -1.39 |
| 21.58 | 4.70 | -0.31 | -0.05 | -1.17 | 8.03  | -1.39 |
| 21.60 | 4.78 | -0.31 | -0.05 | -1.17 | 8.63  | -1.39 |
| 21.62 | 4.81 | -0.32 | -0.04 | -1.17 | 9.25  | -1.38 |
| 21.63 | 4.70 | -0.31 | -0.05 | -1.17 | 9.90  | -1.38 |
| 21.65 | 4.59 | -0.31 | -0.05 | -1.17 | 10.58 | -1.38 |
| 21.67 | 4.64 | -0.31 | -0.05 | -1.17 | 11.27 | -1.38 |
| 21.68 | 4.61 | -0.31 | -0.05 | -1.17 | 11.99 | -1.37 |
| 21.70 | 4.51 | -0.31 | -0.05 | -1.17 | 12.74 | -1.37 |
| 21.72 | 4.54 | -0.31 | -0.05 | -1.17 | 13.51 | -1.38 |
| 21.73 | 4.62 | -0.31 | -0.05 | -1.17 | 14.32 | -1.38 |
| 21.75 | 4.67 | -0.31 | -0.05 | -1.17 | 15.15 | -1.37 |
| 21.77 | 4.71 | -0.31 | -0.05 | -1.16 | 16.00 | -1.37 |
| 21.78 | 4.68 | -0.31 | -0.05 | -1.16 | 16.88 | -1.38 |
| 21.80 | 4.57 | -0.31 | -0.05 | -1.16 | 17.78 | -1.37 |
| 21.82 | 4.45 | -0.31 | -0.05 | -1.16 | 18.70 | -1.37 |
| 21.83 | 4.39 | -0.31 | -0.05 | -1.16 | 19.64 | -1.37 |
| 21.85 | 4.47 | -0.31 | -0.05 | -1.17 | 20.59 | -1.36 |
| 21.87 | 4.54 | -0.30 | -0.05 | -1.17 | 21.57 | -1.37 |
| 21.88 | 4.54 | -0.31 | -0.05 | -1.17 | 22.57 | -1.37 |
| 21.90 | 4.57 | -0.31 | -0.05 | -1.16 | 23.59 | -1.37 |
| 21.92 | 4.64 | -0.31 | -0.05 | -1.16 | 24.63 | -1.37 |
| 21.93 | 4.61 | -0.31 | -0.05 | -1.16 | 25.69 | -1.37 |
| 21.95 | 4.62 | -0.31 | -0.05 | -1.16 | 26.76 | -1.36 |
| 21.97 | 4.71 | -0.31 | -0.05 | -1.17 | 27.85 | -1.36 |
| 21.98 | 4.70 | -0.31 | -0.05 | -1.17 | 28.94 | -1.35 |
| 22.00 | 4.59 | -0.31 | -0.05 | -1.17 | 30.05 | -1.35 |
| 22.02 | 4.56 | -0.31 | -0.05 | -1.17 | 31.16 | -1.35 |
| 22.03 | 4.59 | -0.31 | -0.05 | -1.16 | 32.28 | -1.34 |
| 22.05 | 4.64 | -0.31 | -0.05 | -1.16 | 33.41 | -1.35 |
| 22.07 | 4.64 | -0.31 | -0.05 | -1.16 | 34.56 | -1.35 |
| 22.08 | 4.64 | -0.31 | -0.05 | -1.17 | 35.71 | -1.35 |
| 22.10 | 4.62 | -0.31 | -0.05 | -1.16 | 36.86 | -1.35 |
| 22.12 | 4.61 | -0.31 | -0.05 | -1.16 | 38.02 | -1.34 |
| 22.13 | 4.65 | -0.31 | -0.05 | -1.16 | 39.16 | -1.35 |
| 22.15 | 4.59 | -0.31 | -0.05 | -1.16 | 40.31 | -1.34 |
| 22.17 | 4.53 | -0.31 | -0.04 | -1.16 | 41.46 | -1.34 |
| 22.18 | 4.57 | -0.31 | -0.04 | -1.15 | 42.61 | -1.34 |
| 22.20 | 4.59 | -0.30 | -0.04 | -1.16 | 43.76 | -1.34 |
| 22.22 | 4.59 | -0.30 | -0.04 | -1.16 | 44.92 | -1.34 |
| 22.23 | 4.68 | -0.31 | -0.04 | -1.16 | 46.07 | -1.34 |
| 22.25 | 4.73 | -0.30 | -0.04 | -1.16 | 47.22 | -1.34 |
| 22.27 | 4.71 | -0.30 | -0.04 | -1.15 | 48.37 | -1.34 |
| 22.28 | 4.68 | -0.31 | -0.04 | -1.15 | 49.51 | -1.34 |
| 22.30 | 4.62 | -0.30 | -0.04 | -1.15 | 50.64 | -1.33 |
| 22.32 | 4.51 | -0.30 | -0.04 | -1.15 | 51.77 | -1.33 |
| 22.33 | 4.56 | -0.30 | -0.04 | -1.15 | 52.90 | -1.33 |
| 22.35 | 4.71 | -0.30 | -0.03 | -1.15 | 54.02 | -1.32 |
| 22.37 | 4.84 | -0.30 | -0.03 | -1.16 | 55.15 | -1.32 |
| 22.38 | 4.88 | -0.30 | -0.03 | -1.15 | 56.26 | -1.31 |
| 22.40 | 4.82 | -0.30 | -0.03 | -1.15 | 57.37 | -1.32 |





|       |       |       |       |       |        |       |
|-------|-------|-------|-------|-------|--------|-------|
| 22.42 | 4.73  | -0.30 | -0.03 | -1.14 | 58.48  | -1.32 |
| 22.43 | 4.61  | -0.30 | -0.03 | -1.14 | 59.58  | -1.32 |
| 22.45 | 4.62  | -0.30 | -0.03 | -1.14 | 60.67  | -1.32 |
| 22.47 | 4.70  | -0.30 | -0.02 | -1.14 | 61.75  | -1.32 |
| 22.48 | 4.62  | -0.30 | -0.02 | -1.14 | 62.82  | -1.32 |
| 22.50 | 4.64  | -0.30 | -0.02 | -1.14 | 63.89  | -1.31 |
| 22.52 | 4.78  | -0.30 | -0.02 | -1.13 | 64.96  | -1.30 |
| 22.53 | 4.88  | -0.30 | -0.02 | -1.13 | 66.01  | -1.31 |
| 22.55 | 4.91  | -0.30 | -0.01 | -1.13 | 67.07  | -1.31 |
| 22.57 | 4.90  | -0.30 | -0.01 | -1.13 | 68.11  | -1.31 |
| 22.58 | 4.85  | -0.29 | -0.01 | -1.13 | 69.15  | -1.31 |
| 22.60 | 4.65  | -0.29 | 0.00  | -1.13 | 70.17  | -1.30 |
| 22.62 | 4.51  | -0.29 | 0.00  | -1.12 | 71.18  | -1.30 |
| 22.63 | 4.56  | -0.29 | 0.01  | -1.12 | 72.19  | -1.29 |
| 22.65 | 4.67  | -0.29 | 0.01  | -1.11 | 73.18  | -1.30 |
| 22.67 | 4.81  | -0.29 | 0.02  | -1.11 | 74.16  | -1.30 |
| 22.68 | 4.90  | -0.28 | 0.02  | -1.11 | 75.14  | -1.30 |
| 22.70 | 4.88  | -0.28 | 0.03  | -1.10 | 76.11  | -1.30 |
| 22.72 | 4.88  | -0.28 | 0.03  | -1.10 | 77.06  | -1.30 |
| 22.73 | 4.90  | -0.28 | 0.04  | -1.09 | 78.00  | -1.30 |
| 22.75 | 4.78  | -0.27 | 0.04  | -1.08 | 78.94  | -1.30 |
| 22.77 | 4.65  | -0.27 | 0.05  | -1.07 | 79.85  | -1.29 |
| 22.78 | 4.70  | -0.26 | 0.06  | -1.07 | 80.75  | -1.29 |
| 22.80 | 4.81  | -0.26 | 0.07  | -1.06 | 81.64  | -1.29 |
| 22.82 | 4.88  | -0.25 | 0.08  | -1.05 | 82.51  | -1.28 |
| 22.83 | 4.93  | -0.24 | 0.09  | -1.04 | 83.37  | -1.27 |
| 22.85 | 4.98  | -0.23 | 0.10  | -1.03 | 84.21  | -1.27 |
| 22.87 | 4.98  | -0.21 | 0.12  | -1.02 | 85.04  | -1.28 |
| 22.88 | 4.99  | -0.20 | 0.13  | -1.01 | 85.84  | -1.29 |
| 22.90 | 5.12  | -0.19 | 0.14  | -1.00 | 86.62  | -1.29 |
| 22.92 | 5.13  | -0.18 | 0.16  | -0.98 | 87.39  | -1.28 |
| 22.93 | 5.16  | -0.16 | 0.17  | -0.97 | 88.13  | -1.27 |
| 22.95 | 5.29  | -0.14 | 0.19  | -0.95 | 88.84  | -1.27 |
| 22.97 | 5.32  | -0.12 | 0.21  | -0.94 | 89.54  | -1.27 |
| 22.98 | 5.36  | -0.09 | 0.23  | -0.91 | 90.21  | -1.27 |
| 23.00 | 5.49  | -0.07 | 0.25  | -0.89 | 90.86  | -1.27 |
| 23.02 | 5.61  | -0.04 | 0.27  | -0.86 | 91.48  | -1.27 |
| 23.03 | 5.72  | -0.01 | 0.30  | -0.84 | 92.08  | -1.26 |
| 23.05 | 5.87  | 0.03  | 0.32  | -0.80 | 92.66  | -1.26 |
| 23.07 | 5.95  | 0.07  | 0.35  | -0.77 | 93.22  | -1.26 |
| 23.08 | 5.98  | 0.12  | 0.38  | -0.74 | 93.75  | -1.26 |
| 23.10 | 6.20  | 0.17  | 0.42  | -0.71 | 94.26  | -1.26 |
| 23.12 | 6.41  | 0.22  | 0.45  | -0.66 | 94.74  | -1.25 |
| 23.13 | 6.65  | 0.28  | 0.49  | -0.62 | 95.20  | -1.25 |
| 23.15 | 6.77  | 0.35  | 0.52  | -0.57 | 95.64  | -1.25 |
| 23.17 | 6.85  | 0.42  | 0.56  | -0.52 | 96.05  | -1.25 |
| 23.18 | 6.96  | 0.49  | 0.61  | -0.46 | 96.44  | -1.24 |
| 23.20 | 7.11  | 0.58  | 0.65  | -0.40 | 96.81  | -1.24 |
| 23.22 | 7.33  | 0.67  | 0.70  | -0.33 | 97.17  | -1.24 |
| 23.23 | 7.56  | 0.76  | 0.75  | -0.26 | 97.51  | -1.24 |
| 23.25 | 7.90  | 0.86  | 0.80  | -0.18 | 97.83  | -1.24 |
| 23.27 | 8.16  | 0.97  | 0.86  | -0.10 | 98.12  | -1.24 |
| 23.28 | 8.44  | 1.09  | 0.91  | 0.00  | 98.40  | -1.24 |
| 23.30 | 8.69  | 1.21  | 0.98  | 0.09  | 98.66  | -1.24 |
| 23.32 | 8.92  | 1.35  | 1.04  | 0.20  | 98.90  | -1.24 |
| 23.33 | 9.34  | 1.49  | 1.11  | 0.32  | 99.11  | -1.24 |
| 23.35 | 9.83  | 1.64  | 1.19  | 0.44  | 99.31  | -1.23 |
| 23.37 | 10.26 | 1.80  | 1.27  | 0.57  | 99.48  | -1.22 |
| 23.38 | 10.71 | 1.97  | 1.35  | 0.72  | 99.64  | -1.22 |
| 23.40 | 11.11 | 2.15  | 1.43  | 0.87  | 99.77  | -1.22 |
| 23.42 | 11.44 | 2.34  | 1.53  | 1.03  | 99.87  | -1.22 |
| 23.43 | 11.84 | 2.54  | 1.62  | 1.20  | 99.95  | -1.22 |
| 23.45 | 12.36 | 2.74  | 1.72  | 1.38  | 99.99  | -1.22 |
| 23.47 | 12.78 | 2.96  | 1.82  | 1.57  | 100.00 | -1.21 |
| 23.48 | 13.29 | 3.19  | 1.93  | 1.77  | 99.97  | -1.22 |
| 23.50 | 13.93 | 3.42  | 2.04  | 1.99  | 99.89  | -1.22 |
| 23.52 | 14.56 | 3.68  | 2.16  | 2.22  | 99.78  | -1.22 |
| 23.53 | 15.16 | 3.94  | 2.28  | 2.47  | 99.62  | -1.21 |
| 23.55 | 15.67 | 4.22  | 2.41  | 2.72  | 99.43  | -1.20 |



|       |       |       |       |       |       |       |
|-------|-------|-------|-------|-------|-------|-------|
| 23.57 | 16.37 | 4.50  | 2.55  | 2.98  | 99.18 | -1.20 |
| 23.58 | 17.17 | 4.79  | 2.69  | 3.26  | 98.89 | -1.20 |
| 23.60 | 17.90 | 5.09  | 2.83  | 3.55  | 98.55 | -1.20 |
| 23.62 | 18.50 | 5.41  | 2.99  | 3.84  | 98.16 | -1.20 |
| 23.63 | 19.07 | 5.73  | 3.14  | 4.16  | 97.70 | -1.20 |
| 23.65 | 19.83 | 6.07  | 3.31  | 4.49  | 97.18 | -1.19 |
| 23.67 | 20.68 | 6.42  | 3.47  | 4.83  | 96.60 | -1.19 |
| 23.68 | 21.50 | 6.77  | 3.65  | 5.18  | 95.98 | -1.18 |
| 23.70 | 22.29 | 7.14  | 3.83  | 5.56  | 95.30 | -1.18 |
| 23.72 | 23.12 | 7.52  | 4.02  | 5.94  | 94.57 | -1.18 |
| 23.73 | 23.96 | 7.91  | 4.22  | 6.34  | 93.79 | -1.19 |
| 23.75 | 24.76 | 8.31  | 4.42  | 6.75  | 92.95 | -1.19 |
| 23.77 | 25.78 | 8.72  | 4.64  | 7.17  | 92.07 | -1.18 |
| 23.78 | 26.82 | 9.13  | 4.86  | 7.60  | 91.14 | -1.18 |
| 23.80 | 27.82 | 9.56  | 5.08  | 8.04  | 90.15 | -1.18 |
| 23.82 | 28.75 | 9.99  | 5.31  | 8.50  | 89.12 | -1.19 |
| 23.83 | 29.54 | 10.44 | 5.55  | 8.97  | 88.04 | -1.19 |
| 23.85 | 30.54 | 10.90 | 5.80  | 9.45  | 86.94 | -1.19 |
| 23.87 | 31.73 | 11.36 | 6.05  | 9.95  | 85.82 | -1.18 |
| 23.88 | 32.91 | 11.83 | 6.31  | 10.46 | 84.66 | -1.16 |
| 23.90 | 33.93 | 12.30 | 6.58  | 10.98 | 83.47 | -1.16 |
| 23.92 | 34.95 | 12.78 | 6.86  | 11.50 | 82.27 | -1.16 |
| 23.93 | 36.03 | 13.28 | 7.15  | 12.04 | 81.04 | -1.16 |
| 23.95 | 37.22 | 13.78 | 7.45  | 12.59 | 79.81 | -1.16 |
| 23.97 | 38.44 | 14.28 | 7.76  | 13.13 | 78.57 | -1.16 |
| 23.98 | 39.49 | 14.79 | 8.07  | 13.70 | 77.33 | -1.15 |
| 24.00 | 40.68 | 15.31 | 8.39  | 14.28 | 76.11 | -1.15 |
| 24.02 | 42.02 | 15.83 | 8.72  | 14.87 | 74.89 | -1.16 |
| 24.03 | 43.21 | 16.36 | 9.06  | 15.46 | 73.67 | -1.16 |
| 24.05 | 44.31 | 16.91 | 9.41  | 16.07 | 72.46 | -1.15 |
| 24.07 | 45.53 | 17.45 | 9.77  | 16.67 | 71.26 | -1.15 |
| 24.08 | 46.79 | 18.00 | 10.13 | 17.28 | 70.07 | -1.14 |
| 24.10 | 47.93 | 18.54 | 10.51 | 17.91 | 68.89 | -1.14 |
| 24.12 | 49.07 | 19.11 | 10.90 | 18.53 | 67.71 | -1.14 |
| 24.13 | 50.32 | 19.68 | 11.29 | 19.17 | 66.55 | -1.15 |
| 24.15 | 51.62 | 20.25 | 11.70 | 19.82 | 65.42 | -1.14 |
| 24.17 | 52.92 | 20.83 | 12.11 | 20.47 | 64.31 | -1.13 |
| 24.18 | 54.14 | 21.41 | 12.53 | 21.14 | 63.23 | -1.13 |
| 24.20 | 55.39 | 21.99 | 12.97 | 21.81 | 62.18 | -1.13 |
| 24.22 | 56.65 | 22.58 | 13.42 | 22.48 | 61.15 | -1.13 |
| 24.23 | 57.84 | 23.17 | 13.87 | 23.15 | 60.15 | -1.13 |
| 24.25 | 59.07 | 23.77 | 14.34 | 23.82 | 59.16 | -1.13 |
| 24.27 | 60.25 | 24.37 | 14.82 | 24.50 | 58.18 | -1.12 |
| 24.28 | 61.36 | 24.97 | 15.31 | 25.19 | 57.23 | -1.12 |
| 24.30 | 62.55 | 25.59 | 15.80 | 25.88 | 56.30 | -1.13 |
| 24.32 | 63.76 | 26.21 | 16.32 | 26.58 | 55.39 | -1.12 |
| 24.33 | 64.90 | 26.83 | 16.84 | 27.29 | 54.52 | -1.11 |
| 24.35 | 66.09 | 27.45 | 17.37 | 28.00 | 53.66 | -1.11 |
| 24.37 | 67.37 | 28.08 | 17.91 | 28.72 | 52.82 | -1.12 |
| 24.38 | 68.62 | 28.71 | 18.47 | 29.44 | 52.00 | -1.11 |
| 24.40 | 69.75 | 29.35 | 19.04 | 30.16 | 51.20 | -1.11 |
| 24.42 | 70.90 | 29.99 | 19.62 | 30.88 | 50.40 | -1.12 |
| 24.43 | 72.04 | 30.64 | 20.21 | 31.60 | 49.62 | -1.11 |
| 24.45 | 73.14 | 31.29 | 20.81 | 32.33 | 48.85 | -1.10 |
| 24.47 | 74.19 | 31.95 | 21.43 | 33.07 | 48.10 | -1.10 |
| 24.48 | 75.29 | 32.61 | 22.05 | 33.82 | 47.37 | -1.10 |
| 24.50 | 76.38 | 33.27 | 22.69 | 34.57 | 46.65 | -1.10 |
| 24.52 | 77.43 | 33.93 | 23.35 | 35.34 | 45.95 | -1.10 |
| 24.53 | 78.47 | 34.61 | 24.01 | 36.09 | 45.26 | -1.10 |
| 24.55 | 79.44 | 35.28 | 24.69 | 36.85 | 44.58 | -1.09 |
| 24.57 | 80.45 | 35.97 | 25.38 | 37.61 | 43.91 | -1.09 |
| 24.58 | 81.48 | 36.65 | 26.08 | 38.37 | 43.24 | -1.09 |
| 24.60 | 82.46 | 37.35 | 26.79 | 39.14 | 42.58 | -1.09 |
| 24.62 | 83.38 | 38.05 | 27.52 | 39.90 | 41.94 | -1.09 |
| 24.63 | 84.30 | 38.76 | 28.26 | 40.68 | 41.31 | -1.09 |
| 24.65 | 85.19 | 39.47 | 29.01 | 41.46 | 40.70 | -1.09 |
| 24.67 | 86.11 | 40.18 | 29.77 | 42.26 | 40.10 | -1.08 |
| 24.68 | 86.96 | 40.89 | 30.55 | 43.06 | 39.52 | -1.07 |
| 24.70 | 87.74 | 41.62 | 31.33 | 43.85 | 38.94 | -1.07 |



|       |        |       |       |       |       |       |
|-------|--------|-------|-------|-------|-------|-------|
| 24.72 | 88.58  | 42.35 | 32.13 | 44.65 | 38.38 | -1.07 |
| 24.73 | 89.44  | 43.08 | 32.94 | 45.46 | 37.82 | -1.08 |
| 24.75 | 90.17  | 43.82 | 33.76 | 46.25 | 37.27 | -1.07 |
| 24.77 | 90.77  | 44.57 | 34.59 | 47.06 | 36.73 | -1.07 |
| 24.78 | 91.50  | 45.33 | 35.43 | 47.86 | 36.20 | -1.07 |
| 24.80 | 92.13  | 46.10 | 36.28 | 48.69 | 35.69 | -1.07 |
| 24.82 | 92.70  | 46.87 | 37.14 | 49.52 | 35.19 | -1.07 |
| 24.83 | 93.31  | 47.63 | 38.02 | 50.36 | 34.70 | -1.07 |
| 24.85 | 93.86  | 48.41 | 38.90 | 51.20 | 34.22 | -1.07 |
| 24.87 | 94.45  | 49.19 | 39.79 | 52.04 | 33.75 | -1.07 |
| 24.88 | 95.02  | 49.99 | 40.69 | 52.87 | 33.29 | -1.06 |
| 24.90 | 95.55  | 50.79 | 41.61 | 53.71 | 32.83 | -1.06 |
| 24.92 | 96.06  | 51.59 | 42.52 | 54.56 | 32.39 | -1.06 |
| 24.93 | 96.52  | 52.41 | 43.45 | 55.41 | 31.95 | -1.06 |
| 24.95 | 96.91  | 53.24 | 44.38 | 56.28 | 31.52 | -1.05 |
| 24.97 | 97.28  | 54.06 | 45.33 | 57.15 | 31.11 | -1.05 |
| 24.98 | 97.70  | 54.90 | 46.27 | 58.03 | 30.71 | -1.05 |
| 25.00 | 98.04  | 55.74 | 47.22 | 58.92 | 30.32 | -1.05 |
| 25.02 | 98.25  | 56.59 | 48.19 | 59.80 | 29.93 | -1.05 |
| 25.03 | 98.50  | 57.44 | 49.15 | 60.68 | 29.55 | -1.05 |
| 25.05 | 98.79  | 58.30 | 50.12 | 61.56 | 29.18 | -1.05 |
| 25.07 | 98.96  | 59.17 | 51.10 | 62.44 | 28.80 | -1.04 |
| 25.08 | 99.09  | 60.05 | 52.08 | 63.34 | 28.44 | -1.03 |
| 25.10 | 99.32  | 60.94 | 53.07 | 64.24 | 28.08 | -1.03 |
| 25.12 | 99.57  | 61.84 | 54.05 | 65.16 | 27.74 | -1.03 |
| 25.13 | 99.66  | 62.74 | 55.04 | 66.08 | 27.41 | -1.04 |
| 25.15 | 99.85  | 63.64 | 56.04 | 67.01 | 27.09 | -1.03 |
| 25.17 | 100.00 | 64.55 | 57.03 | 67.93 | 26.77 | -1.03 |
| 25.18 | 99.95  | 65.46 | 58.03 | 68.84 | 26.46 | -1.03 |
| 25.20 | 99.83  | 66.39 | 59.03 | 69.75 | 26.15 | -1.02 |
| 25.22 | 99.75  | 67.31 | 60.02 | 70.66 | 25.85 | -1.02 |
| 25.23 | 99.78  | 68.25 | 61.02 | 71.57 | 25.55 | -1.02 |
| 25.25 | 99.75  | 69.19 | 62.02 | 72.47 | 25.25 | -1.02 |
| 25.27 | 99.74  | 70.14 | 63.01 | 73.39 | 24.97 | -1.01 |
| 25.28 | 99.69  | 71.09 | 64.02 | 74.31 | 24.69 | -1.00 |
| 25.30 | 99.60  | 72.04 | 65.01 | 75.24 | 24.42 | -1.00 |
| 25.32 | 99.44  | 72.98 | 66.00 | 76.17 | 24.15 | -1.01 |
| 25.33 | 99.15  | 73.93 | 66.99 | 77.09 | 23.88 | -1.01 |
| 25.35 | 98.96  | 74.88 | 67.98 | 78.01 | 23.63 | -1.00 |
| 25.37 | 98.72  | 75.83 | 68.96 | 78.91 | 23.37 | -1.00 |
| 25.38 | 98.41  | 76.77 | 69.94 | 79.81 | 23.12 | -1.00 |
| 25.40 | 98.22  | 77.72 | 70.91 | 80.70 | 22.87 | -0.99 |
| 25.42 | 98.04  | 78.67 | 71.88 | 81.58 | 22.62 | -0.99 |
| 25.43 | 97.68  | 79.62 | 72.85 | 82.45 | 22.38 | -0.99 |
| 25.45 | 97.22  | 80.57 | 73.80 | 83.32 | 22.15 | -0.98 |
| 25.47 | 96.88  | 81.49 | 74.75 | 84.19 | 21.92 | -0.98 |
| 25.48 | 96.48  | 82.41 | 75.70 | 85.06 | 21.69 | -0.98 |
| 25.50 | 95.89  | 83.33 | 76.63 | 85.90 | 21.47 | -0.97 |
| 25.52 | 95.32  | 84.23 | 77.56 | 86.72 | 21.26 | -0.97 |
| 25.53 | 94.84  | 85.12 | 78.47 | 87.53 | 21.04 | -0.97 |
| 25.55 | 94.51  | 86.01 | 79.38 | 88.33 | 20.83 | -0.97 |
| 25.57 | 94.05  | 86.88 | 80.28 | 89.10 | 20.62 | -0.96 |
| 25.58 | 93.57  | 87.74 | 81.16 | 89.87 | 20.41 | -0.95 |
| 25.60 | 93.06  | 88.58 | 82.04 | 90.63 | 20.22 | -0.95 |
| 25.62 | 92.41  | 89.40 | 82.90 | 91.36 | 20.02 | -0.95 |
| 25.63 | 91.84  | 90.20 | 83.75 | 92.07 | 19.83 | -0.95 |
| 25.65 | 91.31  | 90.98 | 84.58 | 92.76 | 19.64 | -0.94 |
| 25.67 | 90.83  | 91.74 | 85.40 | 93.42 | 19.46 | -0.94 |
| 25.68 | 90.20  | 92.47 | 86.20 | 94.05 | 19.27 | -0.94 |
| 25.70 | 89.47  | 93.17 | 86.99 | 94.65 | 19.09 | -0.93 |
| 25.72 | 88.76  | 93.85 | 87.77 | 95.23 | 18.91 | -0.93 |
| 25.73 | 88.02  | 94.50 | 88.53 | 95.78 | 18.74 | -0.92 |
| 25.75 | 87.26  | 95.13 | 89.27 | 96.31 | 18.57 | -0.92 |
| 25.77 | 86.58  | 95.73 | 89.99 | 96.81 | 18.40 | -0.92 |
| 25.78 | 85.97  | 96.29 | 90.69 | 97.28 | 18.23 | -0.91 |
| 25.80 | 85.26  | 96.82 | 91.37 | 97.71 | 18.07 | -0.91 |
| 25.82 | 84.40  | 97.30 | 92.03 | 98.11 | 17.92 | -0.90 |
| 25.83 | 83.68  | 97.74 | 92.67 | 98.48 | 17.76 | -0.90 |
| 25.85 | 82.97  | 98.15 | 93.29 | 98.81 | 17.60 | -0.89 |



|       |       |        |        |        |       |       |
|-------|-------|--------|--------|--------|-------|-------|
| 25.87 | 82.12 | 98.52  | 93.88  | 99.09  | 17.44 | -0.88 |
| 25.88 | 81.31 | 98.86  | 94.45  | 99.33  | 17.29 | -0.88 |
| 25.90 | 80.56 | 99.17  | 95.00  | 99.54  | 17.14 | -0.88 |
| 25.92 | 79.68 | 99.44  | 95.52  | 99.72  | 17.00 | -0.88 |
| 25.93 | 78.84 | 99.65  | 96.02  | 99.85  | 16.85 | -0.87 |
| 25.95 | 77.96 | 99.81  | 96.49  | 99.95  | 16.72 | -0.87 |
| 25.97 | 77.08 | 99.93  | 96.93  | 100.00 | 16.58 | -0.86 |
| 25.98 | 76.15 | 99.99  | 97.34  | 100.00 | 16.44 | -0.85 |
| 26.00 | 75.21 | 100.00 | 97.73  | 99.95  | 16.30 | -0.84 |
| 26.02 | 74.44 | 99.96  | 98.10  | 99.85  | 16.17 | -0.83 |
| 26.03 | 73.57 | 99.87  | 98.43  | 99.68  | 16.03 | -0.83 |
| 26.05 | 72.44 | 99.74  | 98.73  | 99.48  | 15.90 | -0.82 |
| 26.07 | 71.39 | 99.56  | 99.00  | 99.23  | 15.77 | -0.81 |
| 26.08 | 70.42 | 99.32  | 99.24  | 98.94  | 15.64 | -0.80 |
| 26.10 | 69.37 | 99.02  | 99.45  | 98.59  | 15.52 | -0.80 |
| 26.12 | 68.41 | 98.66  | 99.62  | 98.18  | 15.40 | -0.80 |
| 26.13 | 67.40 | 98.24  | 99.76  | 97.73  | 15.27 | -0.79 |
| 26.15 | 66.26 | 97.77  | 99.87  | 97.22  | 15.15 | -0.79 |
| 26.17 | 65.13 | 97.24  | 99.94  | 96.66  | 15.03 | -0.78 |
| 26.18 | 64.06 | 96.64  | 99.99  | 96.04  | 14.91 | -0.77 |
| 26.20 | 62.97 | 95.99  | 100.00 | 95.37  | 14.80 | -0.76 |
| 26.22 | 61.89 | 95.28  | 99.98  | 94.66  | 14.68 | -0.74 |
| 26.23 | 60.71 | 94.52  | 99.93  | 93.91  | 14.57 | -0.73 |
| 26.25 | 59.43 | 93.70  | 99.84  | 93.11  | 14.46 | -0.72 |
| 26.27 | 58.25 | 92.82  | 99.71  | 92.27  | 14.35 | -0.72 |
| 26.28 | 57.13 | 91.88  | 99.55  | 91.39  | 14.24 | -0.71 |
| 26.30 | 55.95 | 90.89  | 99.36  | 90.46  | 14.13 | -0.71 |
| 26.32 | 54.82 | 89.83  | 99.12  | 89.50  | 14.03 | -0.70 |
| 26.33 | 53.83 | 88.73  | 98.86  | 88.51  | 13.92 | -0.69 |
| 26.35 | 52.70 | 87.59  | 98.57  | 87.48  | 13.81 | -0.68 |
| 26.37 | 51.50 | 86.41  | 98.23  | 86.43  | 13.71 | -0.67 |
| 26.38 | 50.32 | 85.19  | 97.87  | 85.36  | 13.61 | -0.66 |
| 26.40 | 49.07 | 83.94  | 97.47  | 84.26  | 13.51 | -0.65 |
| 26.42 | 47.85 | 82.66  | 97.04  | 83.14  | 13.41 | -0.64 |
| 26.43 | 46.68 | 81.33  | 96.57  | 82.01  | 13.32 | -0.62 |
| 26.45 | 45.58 | 79.98  | 96.08  | 80.87  | 13.22 | -0.61 |
| 26.47 | 44.45 | 78.60  | 95.55  | 79.73  | 13.12 | -0.61 |
| 26.48 | 43.21 | 77.20  | 94.99  | 78.57  | 13.03 | -0.59 |
| 26.50 | 42.09 | 75.78  | 94.41  | 77.41  | 12.93 | -0.59 |
| 26.52 | 41.10 | 74.36  | 93.80  | 76.23  | 12.84 | -0.57 |
| 26.53 | 40.19 | 72.93  | 93.16  | 75.06  | 12.75 | -0.56 |
| 26.55 | 39.18 | 71.50  | 92.50  | 73.89  | 12.66 | -0.55 |
| 26.57 | 38.15 | 70.07  | 91.81  | 72.74  | 12.57 | -0.54 |
| 26.58 | 37.25 | 68.64  | 91.09  | 71.60  | 12.49 | -0.53 |
| 26.60 | 36.34 | 67.21  | 90.35  | 70.47  | 12.40 | -0.52 |
| 26.62 | 35.41 | 65.78  | 89.59  | 69.36  | 12.32 | -0.51 |
| 26.63 | 34.48 | 64.37  | 88.82  | 68.25  | 12.23 | -0.50 |
| 26.65 | 33.68 | 62.98  | 88.03  | 67.15  | 12.15 | -0.48 |
| 26.67 | 32.95 | 61.60  | 87.23  | 66.06  | 12.06 | -0.46 |
| 26.68 | 32.16 | 60.25  | 86.42  | 64.99  | 11.98 | -0.45 |
| 26.70 | 31.38 | 58.93  | 85.59  | 63.93  | 11.90 | -0.44 |
| 26.72 | 30.76 | 57.63  | 84.75  | 62.90  | 11.82 | -0.43 |
| 26.73 | 30.19 | 56.35  | 83.90  | 61.88  | 11.74 | -0.42 |
| 26.75 | 29.54 | 55.10  | 83.05  | 60.89  | 11.66 | -0.40 |
| 26.77 | 28.92 | 53.86  | 82.19  | 59.92  | 11.59 | -0.38 |
| 26.78 | 28.32 | 52.66  | 81.33  | 58.96  | 11.51 | -0.37 |
| 26.80 | 27.65 | 51.48  | 80.47  | 58.02  | 11.44 | -0.36 |
| 26.82 | 27.06 | 50.33  | 79.62  | 57.10  | 11.36 | -0.34 |
| 26.83 | 26.65 | 49.21  | 78.76  | 56.18  | 11.29 | -0.33 |
| 26.85 | 26.09 | 48.13  | 77.92  | 55.30  | 11.21 | -0.31 |
| 26.87 | 25.41 | 47.08  | 77.07  | 54.43  | 11.14 | -0.30 |
| 26.88 | 24.87 | 46.06  | 76.23  | 53.57  | 11.07 | -0.29 |
| 26.90 | 24.54 | 45.07  | 75.39  | 52.75  | 11.00 | -0.27 |
| 26.92 | 24.23 | 44.10  | 74.56  | 51.94  | 10.93 | -0.26 |
| 26.93 | 23.83 | 43.16  | 73.74  | 51.15  | 10.86 | -0.24 |
| 26.95 | 23.37 | 42.25  | 72.93  | 50.38  | 10.79 | -0.22 |
| 26.97 | 22.86 | 41.36  | 72.13  | 49.61  | 10.73 | -0.21 |
| 26.98 | 22.41 | 40.49  | 71.34  | 48.86  | 10.66 | -0.19 |
| 27.00 | 22.04 | 39.65  | 70.56  | 48.13  | 10.60 | -0.18 |



|       |       |       |       |       |       |       |
|-------|-------|-------|-------|-------|-------|-------|
| 27.02 | 21.70 | 38.84 | 69.78 | 47.42 | 10.54 | -0.16 |
| 27.03 | 21.42 | 38.05 | 69.02 | 46.71 | 10.48 | -0.14 |
| 27.05 | 21.21 | 37.29 | 68.26 | 46.03 | 10.42 | -0.13 |
| 27.07 | 20.91 | 36.56 | 67.52 | 45.37 | 10.35 | -0.12 |
| 27.08 | 20.48 | 35.84 | 66.78 | 44.72 | 10.29 | -0.11 |
| 27.10 | 20.15 | 35.14 | 66.05 | 44.08 | 10.23 | -0.08 |
| 27.12 | 19.94 | 34.45 | 65.34 | 43.46 | 10.17 | -0.06 |
| 27.13 | 19.78 | 33.78 | 64.64 | 42.84 | 10.10 | -0.05 |
| 27.15 | 19.61 | 33.14 | 63.94 | 42.24 | 10.04 | -0.03 |
| 27.17 | 19.40 | 32.51 | 63.25 | 41.64 | 9.98  | -0.01 |
| 27.18 | 19.07 | 31.90 | 62.57 | 41.05 | 9.92  | 0.00  |
| 27.20 | 18.79 | 31.31 | 61.90 | 40.49 | 9.86  | 0.01  |
| 27.22 | 18.64 | 30.74 | 61.24 | 39.94 | 9.81  | 0.02  |
| 27.23 | 18.45 | 30.18 | 60.58 | 39.40 | 9.75  | 0.04  |
| 27.25 | 18.27 | 29.63 | 59.93 | 38.87 | 9.70  | 0.06  |
| 27.27 | 18.01 | 29.10 | 59.29 | 38.35 | 9.64  | 0.07  |
| 27.28 | 17.67 | 28.58 | 58.66 | 37.83 | 9.59  | 0.09  |
| 27.30 | 17.45 | 28.08 | 58.04 | 37.32 | 9.53  | 0.11  |
| 27.32 | 17.20 | 27.59 | 57.42 | 36.82 | 9.48  | 0.13  |
| 27.33 | 16.99 | 27.11 | 56.81 | 36.34 | 9.43  | 0.14  |
| 27.35 | 16.89 | 26.65 | 56.21 | 35.86 | 9.38  | 0.16  |
| 27.37 | 16.72 | 26.19 | 55.61 | 35.38 | 9.33  | 0.17  |
| 27.38 | 16.55 | 25.75 | 55.02 | 34.93 | 9.28  | 0.19  |
| 27.40 | 16.43 | 25.32 | 54.43 | 34.48 | 9.23  | 0.21  |
| 27.42 | 16.29 | 24.89 | 53.85 | 34.04 | 9.18  | 0.22  |
| 27.43 | 16.11 | 24.48 | 53.27 | 33.60 | 9.13  | 0.23  |
| 27.45 | 15.94 | 24.08 | 52.70 | 33.16 | 9.08  | 0.25  |
| 27.47 | 15.80 | 23.68 | 52.14 | 32.73 | 9.03  | 0.26  |
| 27.48 | 15.75 | 23.29 | 51.58 | 32.29 | 8.98  | 0.28  |
| 27.50 | 15.81 | 22.92 | 51.03 | 31.88 | 8.94  | 0.30  |
| 27.52 | 15.77 | 22.56 | 50.48 | 31.48 | 8.89  | 0.32  |
| 27.53 | 15.52 | 22.20 | 49.94 | 31.09 | 8.85  | 0.33  |
| 27.55 | 15.27 | 21.85 | 49.40 | 30.71 | 8.80  | 0.34  |
| 27.57 | 15.15 | 21.51 | 48.87 | 30.34 | 8.76  | 0.36  |
| 27.58 | 15.05 | 21.18 | 48.34 | 29.96 | 8.71  | 0.38  |
| 27.60 | 14.93 | 20.85 | 47.82 | 29.60 | 8.67  | 0.39  |
| 27.62 | 14.87 | 20.53 | 47.30 | 29.23 | 8.63  | 0.41  |
| 27.63 | 14.74 | 20.22 | 46.79 | 28.87 | 8.58  | 0.42  |
| 27.65 | 14.59 | 19.91 | 46.28 | 28.51 | 8.54  | 0.44  |
| 27.67 | 14.48 | 19.62 | 45.78 | 28.16 | 8.50  | 0.44  |
| 27.68 | 14.44 | 19.34 | 45.28 | 27.82 | 8.46  | 0.45  |
| 27.70 | 14.39 | 19.06 | 44.78 | 27.48 | 8.42  | 0.47  |
| 27.72 | 14.28 | 18.78 | 44.29 | 27.15 | 8.38  | 0.48  |
| 27.73 | 14.17 | 18.50 | 43.80 | 26.83 | 8.33  | 0.50  |
| 27.75 | 14.14 | 18.24 | 43.32 | 26.52 | 8.30  | 0.51  |
| 27.77 | 14.05 | 17.98 | 42.84 | 26.20 | 8.26  | 0.52  |
| 27.78 | 13.91 | 17.73 | 42.37 | 25.88 | 8.21  | 0.53  |
| 27.80 | 13.80 | 17.48 | 41.90 | 25.56 | 8.17  | 0.55  |
| 27.82 | 14.17 | 17.23 | 41.43 | 25.25 | 8.14  | 0.56  |
| 27.83 | 18.62 | 17.00 | 40.97 | 24.95 | 8.10  | 0.57  |
| 27.85 | 24.27 | 16.76 | 40.51 | 24.65 | 8.06  | 0.58  |
| 27.87 | 21.17 | 16.54 | 40.05 | 24.36 | 8.02  | 0.59  |
| 27.88 | 16.20 | 16.32 | 39.61 | 24.07 | 7.98  | 0.61  |
| 27.90 | 14.88 | 16.11 | 39.16 | 23.79 | 7.95  | 0.62  |
| 27.92 | 14.54 | 15.90 | 38.72 | 23.52 | 7.91  | 0.62  |
| 27.93 | 14.45 | 15.68 | 38.29 | 23.24 | 7.87  | 0.64  |
| 27.95 | 14.45 | 15.47 | 37.86 | 22.96 | 7.83  | 0.66  |
| 27.97 | 14.28 | 15.27 | 37.43 | 22.69 | 7.80  | 0.66  |
| 27.98 | 14.11 | 15.08 | 37.01 | 22.41 | 7.76  | 0.66  |
| 28.00 | 14.00 | 14.89 | 36.59 | 22.15 | 7.73  | 0.67  |
| 28.02 | 13.96 | 14.71 | 36.17 | 21.89 | 7.69  | 0.68  |
| 28.03 | 13.96 | 14.53 | 35.76 | 21.65 | 7.66  | 0.70  |
| 28.05 | 13.96 | 14.35 | 35.35 | 21.40 | 7.63  | 0.70  |
| 28.07 | 13.97 | 14.17 | 34.95 | 21.15 | 7.59  | 0.71  |
| 28.08 | 13.91 | 13.99 | 34.56 | 20.90 | 7.55  | 0.72  |
| 28.10 | 13.80 | 13.82 | 34.16 | 20.65 | 7.52  | 0.73  |
| 28.12 | 13.66 | 13.66 | 33.77 | 20.41 | 7.49  | 0.73  |
| 28.13 | 13.48 | 13.50 | 33.39 | 20.17 | 7.46  | 0.74  |
| 28.15 | 13.40 | 13.34 | 33.00 | 19.94 | 7.42  | 0.74  |



|       |       |       |       |       |      |      |
|-------|-------|-------|-------|-------|------|------|
| 28.17 | 13.31 | 13.18 | 32.62 | 19.71 | 7.39 | 0.75 |
| 28.18 | 13.18 | 13.03 | 32.25 | 19.48 | 7.36 | 0.75 |
| 28.20 | 13.18 | 12.88 | 31.88 | 19.27 | 7.33 | 0.76 |
| 28.22 | 13.21 | 12.74 | 31.51 | 19.05 | 7.30 | 0.76 |
| 28.23 | 13.23 | 12.59 | 31.15 | 18.84 | 7.26 | 0.77 |
| 28.25 | 13.15 | 12.45 | 30.79 | 18.63 | 7.23 | 0.77 |
| 28.27 | 13.08 | 12.31 | 30.44 | 18.41 | 7.20 | 0.77 |
| 28.28 | 13.01 | 12.17 | 30.09 | 18.20 | 7.17 | 0.77 |
| 28.30 | 12.91 | 12.04 | 29.74 | 17.99 | 7.14 | 0.77 |
| 28.32 | 12.87 | 11.92 | 29.39 | 17.79 | 7.11 | 0.78 |
| 28.33 | 12.97 | 11.79 | 29.05 | 17.59 | 7.08 | 0.78 |
| 28.35 | 12.95 | 11.67 | 28.72 | 17.40 | 7.06 | 0.78 |
| 28.37 | 12.86 | 11.54 | 28.39 | 17.21 | 7.03 | 0.78 |
| 28.38 | 12.87 | 11.42 | 28.06 | 17.02 | 7.00 | 0.78 |
| 28.40 | 12.86 | 11.30 | 27.73 | 16.83 | 6.97 | 0.79 |
| 28.42 | 12.69 | 11.19 | 27.42 | 16.64 | 6.94 | 0.80 |
| 28.43 | 12.61 | 11.07 | 27.10 | 16.46 | 6.91 | 0.80 |
| 28.45 | 12.86 | 10.96 | 26.79 | 16.27 | 6.88 | 0.79 |
| 28.47 | 12.97 | 10.85 | 26.48 | 16.09 | 6.86 | 0.79 |
| 28.48 | 12.74 | 10.74 | 26.17 | 15.92 | 6.83 | 0.79 |
| 28.50 | 12.60 | 10.64 | 25.87 | 15.75 | 6.81 | 0.79 |
| 28.52 | 12.61 | 10.54 | 25.57 | 15.58 | 6.78 | 0.80 |
| 28.53 | 12.57 | 10.44 | 25.28 | 15.41 | 6.75 | 0.80 |
| 28.55 | 12.44 | 10.33 | 24.99 | 15.24 | 6.73 | 0.80 |
| 28.57 | 12.49 | 10.23 | 24.70 | 15.08 | 6.70 | 0.79 |
| 28.58 | 12.53 | 10.13 | 24.42 | 14.91 | 6.68 | 0.79 |
| 28.60 | 12.52 | 10.04 | 24.14 | 14.75 | 6.65 | 0.78 |
| 28.62 | 12.43 | 9.95  | 23.86 | 14.59 | 6.62 | 0.78 |
| 28.63 | 12.38 | 9.85  | 23.59 | 14.44 | 6.59 | 0.78 |
| 28.65 | 12.44 | 9.76  | 23.32 | 14.28 | 6.57 | 0.78 |
| 28.67 | 12.47 | 9.68  | 23.05 | 14.13 | 6.54 | 0.78 |
| 28.68 | 12.24 | 9.59  | 22.79 | 13.98 | 6.52 | 0.78 |
| 28.70 | 11.75 | 9.51  | 22.53 | 13.84 | 6.50 | 0.77 |
| 28.72 | 11.55 | 9.42  | 22.27 | 13.69 | 6.47 | 0.77 |
| 28.73 | 11.53 | 9.33  | 22.02 | 13.54 | 6.44 | 0.77 |
| 28.75 | 11.42 | 9.25  | 21.77 | 13.40 | 6.42 | 0.76 |
| 28.77 | 11.36 | 9.17  | 21.52 | 13.25 | 6.40 | 0.75 |
| 28.78 | 11.28 | 9.09  | 21.28 | 13.11 | 6.37 | 0.74 |
| 28.80 | 11.14 | 9.01  | 21.03 | 12.98 | 6.35 | 0.74 |
| 28.82 | 11.16 | 8.94  | 20.79 | 12.85 | 6.33 | 0.74 |
| 28.83 | 11.25 | 8.86  | 20.56 | 12.72 | 6.30 | 0.73 |
| 28.85 | 11.25 | 8.79  | 20.32 | 12.59 | 6.28 | 0.73 |
| 28.87 | 11.13 | 8.72  | 20.09 | 12.46 | 6.25 | 0.73 |
| 28.88 | 11.08 | 8.65  | 19.87 | 12.33 | 6.23 | 0.72 |
| 28.90 | 11.16 | 8.57  | 19.65 | 12.20 | 6.21 | 0.73 |
| 28.92 | 11.13 | 8.51  | 19.42 | 12.08 | 6.18 | 0.72 |
| 28.93 | 11.00 | 8.44  | 19.21 | 11.95 | 6.16 | 0.71 |
| 28.95 | 10.94 | 8.37  | 18.99 | 11.83 | 6.14 | 0.70 |
| 28.97 | 10.96 | 8.31  | 18.78 | 11.71 | 6.11 | 0.70 |
| 28.98 | 10.96 | 8.24  | 18.57 | 11.59 | 6.09 | 0.70 |
| 29.00 | 10.83 | 8.18  | 18.36 | 11.48 | 6.07 | 0.69 |
| 29.02 | 10.68 | 8.11  | 18.15 | 11.37 | 6.05 | 0.68 |
| 29.03 | 10.68 | 8.05  | 17.95 | 11.26 | 6.03 | 0.68 |
| 29.05 | 10.79 | 7.98  | 17.75 | 11.15 | 6.01 | 0.67 |
| 29.07 | 10.88 | 7.92  | 17.56 | 11.03 | 5.99 | 0.66 |
| 29.08 | 10.85 | 7.86  | 17.36 | 10.92 | 5.97 | 0.66 |
| 29.10 | 10.80 | 7.80  | 17.17 | 10.82 | 5.95 | 0.65 |
| 29.12 | 10.74 | 7.74  | 16.98 | 10.71 | 5.93 | 0.64 |
| 29.13 | 10.65 | 7.68  | 16.79 | 10.60 | 5.91 | 0.64 |
| 29.15 | 10.59 | 7.62  | 16.61 | 10.50 | 5.89 | 0.63 |
| 29.17 | 10.62 | 7.57  | 16.43 | 10.40 | 5.87 | 0.63 |
| 29.18 | 10.68 | 7.52  | 16.25 | 10.30 | 5.85 | 0.63 |
| 29.20 | 10.63 | 7.46  | 16.07 | 10.20 | 5.83 | 0.63 |
| 29.22 | 10.57 | 7.41  | 15.89 | 10.10 | 5.81 | 0.62 |
| 29.23 | 10.53 | 7.35  | 15.72 | 10.00 | 5.80 | 0.61 |
| 29.25 | 10.51 | 7.30  | 15.55 | 9.90  | 5.78 | 0.61 |
| 29.27 | 10.60 | 7.25  | 15.38 | 9.80  | 5.76 | 0.60 |
| 29.28 | 10.68 | 7.19  | 15.22 | 9.71  | 5.75 | 0.60 |
| 29.30 | 10.60 | 7.14  | 15.05 | 9.62  | 5.73 | 0.59 |



|       |       |      |       |      |      |      |
|-------|-------|------|-------|------|------|------|
| 29.32 | 10.49 | 7.09 | 14.89 | 9.53 | 5.71 | 0.58 |
| 29.33 | 10.46 | 7.04 | 14.73 | 9.45 | 5.69 | 0.58 |
| 29.35 | 10.37 | 6.99 | 14.57 | 9.36 | 5.68 | 0.57 |
| 29.37 | 10.28 | 6.95 | 14.42 | 9.27 | 5.66 | 0.56 |
| 29.38 | 10.28 | 6.90 | 14.27 | 9.18 | 5.64 | 0.56 |
| 29.40 | 10.34 | 6.85 | 14.11 | 9.10 | 5.62 | 0.55 |
| 29.42 | 10.32 | 6.81 | 13.96 | 9.01 | 5.60 | 0.55 |
| 29.43 | 10.17 | 6.75 | 13.81 | 8.92 | 5.58 | 0.55 |
| 29.45 | 10.09 | 6.71 | 13.66 | 8.85 | 5.57 | 0.54 |
| 29.47 | 10.17 | 6.66 | 13.52 | 8.76 | 5.55 | 0.54 |
| 29.48 | 10.26 | 6.62 | 13.38 | 8.68 | 5.53 | 0.53 |
| 29.50 | 10.26 | 6.58 | 13.23 | 8.60 | 5.51 | 0.53 |
| 29.52 | 10.22 | 6.53 | 13.09 | 8.52 | 5.49 | 0.53 |
| 29.53 | 10.23 | 6.48 | 12.96 | 8.45 | 5.47 | 0.52 |
| 29.55 | 10.20 | 6.44 | 12.83 | 8.37 | 5.46 | 0.52 |
| 29.57 | 10.17 | 6.40 | 12.69 | 8.29 | 5.44 | 0.51 |
| 29.58 | 10.28 | 6.36 | 12.56 | 8.22 | 5.42 | 0.51 |
| 29.60 | 10.28 | 6.32 | 12.43 | 8.15 | 5.41 | 0.50 |
| 29.62 | 10.11 | 6.28 | 12.30 | 8.08 | 5.39 | 0.49 |
| 29.63 | 9.95  | 6.24 | 12.17 | 8.01 | 5.37 | 0.50 |
| 29.65 | 9.94  | 6.20 | 12.04 | 7.94 | 5.35 | 0.50 |
| 29.67 | 10.02 | 6.16 | 11.92 | 7.87 | 5.34 | 0.49 |
| 29.68 | 10.00 | 6.12 | 11.79 | 7.80 | 5.33 | 0.49 |
| 29.70 | 9.94  | 6.08 | 11.68 | 7.73 | 5.31 | 0.48 |
| 29.72 | 9.94  | 6.04 | 11.56 | 7.66 | 5.29 | 0.48 |
| 29.73 | 9.94  | 6.00 | 11.44 | 7.60 | 5.28 | 0.48 |
| 29.75 | 9.94  | 5.96 | 11.32 | 7.53 | 5.26 | 0.48 |
| 29.77 | 10.02 | 5.93 | 11.20 | 7.46 | 5.24 | 0.48 |
| 29.78 | 10.03 | 5.89 | 11.09 | 7.40 | 5.23 | 0.48 |
| 29.80 | 10.03 | 5.85 | 10.97 | 7.34 | 5.22 | 0.48 |
| 29.82 | 9.98  | 5.82 | 10.86 | 7.28 | 5.20 | 0.48 |
| 29.83 | 9.88  | 5.78 | 10.75 | 7.21 | 5.18 | 0.48 |
| 29.85 | 9.88  | 5.75 | 10.65 | 7.15 | 5.17 | 0.47 |
| 29.87 | 9.95  | 5.71 | 10.54 | 7.10 | 5.15 | 0.47 |
| 29.88 | 9.95  | 5.67 | 10.43 | 7.03 | 5.14 | 0.47 |
| 29.90 | 9.77  | 5.64 | 10.33 | 6.97 | 5.13 | 0.46 |
| 29.92 | 9.80  | 5.60 | 10.22 | 6.91 | 5.11 | 0.46 |
| 29.93 | 9.92  | 5.57 | 10.12 | 6.86 | 5.10 | 0.46 |
| 29.95 | 9.89  | 5.53 | 10.02 | 6.80 | 5.08 | 0.46 |
| 29.97 | 9.85  | 5.50 | 9.92  | 6.75 | 5.07 | 0.46 |
| 29.98 | 9.85  | 5.47 | 9.82  | 6.69 | 5.06 | 0.46 |
| 30.00 | 9.77  | 5.43 | 9.72  | 6.63 | 5.04 | 0.46 |
| 30.02 | 9.63  | 5.40 | 9.62  | 6.58 | 5.03 | 0.45 |
| 30.03 | 9.60  | 5.37 | 9.53  | 6.52 | 5.02 | 0.46 |
| 30.05 | 9.64  | 5.34 | 9.44  | 6.47 | 5.00 | 0.46 |
| 30.07 | 9.72  | 5.31 | 9.34  | 6.42 | 4.99 | 0.46 |
| 30.08 | 9.72  | 5.28 | 9.25  | 6.37 | 4.98 | 0.45 |
| 30.10 | 9.57  | 5.24 | 9.16  | 6.32 | 4.96 | 0.45 |
| 30.12 | 9.49  | 5.21 | 9.07  | 6.27 | 4.94 | 0.44 |
| 30.13 | 9.55  | 5.18 | 8.98  | 6.22 | 4.93 | 0.45 |
| 30.15 | 9.60  | 5.15 | 8.89  | 6.18 | 4.92 | 0.45 |
| 30.17 | 9.51  | 5.12 | 8.81  | 6.13 | 4.91 | 0.45 |
| 30.18 | 9.46  | 5.09 | 8.72  | 6.08 | 4.90 | 0.45 |
| 30.20 | 9.54  | 5.06 | 8.64  | 6.03 | 4.88 | 0.45 |
| 30.22 | 9.58  | 5.03 | 8.55  | 5.98 | 4.87 | 0.45 |
| 30.23 | 9.52  | 5.01 | 8.47  | 5.93 | 4.86 | 0.45 |
| 30.25 | 9.47  | 4.98 | 8.38  | 5.89 | 4.84 | 0.46 |
| 30.27 | 9.41  | 4.95 | 8.30  | 5.85 | 4.83 | 0.46 |
| 30.28 | 9.40  | 4.92 | 8.22  | 5.80 | 4.82 | 0.46 |
| 30.30 | 9.44  | 4.89 | 8.14  | 5.75 | 4.81 | 0.46 |
| 30.32 | 9.46  | 4.86 | 8.06  | 5.71 | 4.80 | 0.46 |
| 30.33 | 9.49  | 4.83 | 7.99  | 5.67 | 4.79 | 0.46 |
| 30.35 | 9.60  | 4.80 | 7.91  | 5.63 | 4.78 | 0.46 |
| 30.37 | 9.60  | 4.78 | 7.84  | 5.58 | 4.76 | 0.46 |
| 30.38 | 9.47  | 4.75 | 7.76  | 5.54 | 4.75 | 0.47 |
| 30.40 | 9.47  | 4.73 | 7.69  | 5.50 | 4.74 | 0.47 |
| 30.42 | 9.41  | 4.70 | 7.61  | 5.46 | 4.73 | 0.47 |
| 30.43 | 9.30  | 4.67 | 7.54  | 5.42 | 4.72 | 0.47 |
| 30.45 | 9.27  | 4.64 | 7.47  | 5.38 | 4.71 | 0.47 |



|       |      |      |      |      |      |      |
|-------|------|------|------|------|------|------|
| 30.47 | 9.29 | 4.62 | 7.40 | 5.34 | 4.69 | 0.48 |
| 30.48 | 9.27 | 4.59 | 7.33 | 5.30 | 4.68 | 0.48 |
| 30.50 | 9.32 | 4.57 | 7.26 | 5.26 | 4.67 | 0.48 |
| 30.52 | 9.32 | 4.55 | 7.19 | 5.22 | 4.66 | 0.48 |
| 30.53 | 9.21 | 4.52 | 7.13 | 5.18 | 4.65 | 0.47 |
| 30.55 | 9.17 | 4.50 | 7.06 | 5.15 | 4.64 | 0.47 |
| 30.57 | 9.23 | 4.47 | 6.99 | 5.11 | 4.63 | 0.47 |
| 30.58 | 9.32 | 4.44 | 6.92 | 5.08 | 4.62 | 0.47 |
| 30.60 | 9.24 | 4.43 | 6.86 | 5.04 | 4.61 | 0.48 |
| 30.62 | 9.23 | 4.41 | 6.80 | 5.01 | 4.60 | 0.48 |
| 30.63 | 9.37 | 4.38 | 6.74 | 4.97 | 4.59 | 0.49 |
| 30.65 | 9.40 | 4.36 | 6.67 | 4.93 | 4.58 | 0.48 |
| 30.67 | 9.23 | 4.34 | 6.61 | 4.90 | 4.57 | 0.48 |
| 30.68 | 9.03 | 4.31 | 6.55 | 4.87 | 4.56 | 0.49 |
| 30.70 | 8.95 | 4.28 | 6.49 | 4.83 | 4.55 | 0.49 |
| 30.72 | 8.95 | 4.26 | 6.43 | 4.80 | 4.54 | 0.48 |
| 30.73 | 9.03 | 4.24 | 6.37 | 4.76 | 4.53 | 0.49 |
| 30.75 | 9.18 | 4.22 | 6.31 | 4.73 | 4.52 | 0.50 |
| 30.77 | 9.18 | 4.20 | 6.25 | 4.70 | 4.51 | 0.49 |
| 30.78 | 9.03 | 4.18 | 6.20 | 4.67 | 4.50 | 0.49 |
| 30.80 | 8.98 | 4.16 | 6.14 | 4.64 | 4.49 | 0.49 |
| 30.82 | 9.09 | 4.14 | 6.08 | 4.61 | 4.48 | 0.50 |
| 30.83 | 9.07 | 4.11 | 6.03 | 4.58 | 4.47 | 0.51 |
| 30.85 | 9.03 | 4.09 | 5.98 | 4.54 | 4.46 | 0.51 |
| 30.87 | 9.10 | 4.07 | 5.92 | 4.51 | 4.45 | 0.51 |
| 30.88 | 9.07 | 4.05 | 5.87 | 4.48 | 4.44 | 0.51 |
| 30.90 | 9.01 | 4.03 | 5.82 | 4.45 | 4.43 | 0.52 |
| 30.92 | 9.04 | 4.02 | 5.77 | 4.42 | 4.43 | 0.52 |
| 30.93 | 9.12 | 4.00 | 5.71 | 4.40 | 4.42 | 0.52 |
| 30.95 | 9.15 | 3.97 | 5.66 | 4.37 | 4.41 | 0.52 |
| 30.97 | 9.00 | 3.95 | 5.61 | 4.34 | 4.40 | 0.52 |
| 30.98 | 8.78 | 3.93 | 5.56 | 4.31 | 4.39 | 0.52 |
| 31.00 | 8.78 | 3.91 | 5.51 | 4.28 | 4.39 | 0.53 |
| 31.02 | 8.86 | 3.90 | 5.46 | 4.25 | 4.38 | 0.53 |
| 31.03 | 8.89 | 3.88 | 5.41 | 4.22 | 4.37 | 0.53 |
| 31.05 | 8.95 | 3.86 | 5.37 | 4.20 | 4.36 | 0.53 |
| 31.07 | 8.96 | 3.84 | 5.32 | 4.18 | 4.35 | 0.53 |
| 31.08 | 8.95 | 3.82 | 5.28 | 4.14 | 4.34 | 0.54 |
| 31.10 | 8.98 | 3.80 | 5.23 | 4.12 | 4.33 | 0.55 |
| 31.12 | 9.00 | 3.79 | 5.18 | 4.09 | 4.32 | 0.54 |
| 31.13 | 8.96 | 3.77 | 5.14 | 4.06 | 4.32 | 0.54 |
| 31.15 | 8.92 | 3.75 | 5.10 | 4.04 | 4.31 | 0.55 |
| 31.17 | 8.79 | 3.73 | 5.05 | 4.02 | 4.30 | 0.56 |
| 31.18 | 8.64 | 3.71 | 5.01 | 3.99 | 4.30 | 0.56 |
| 31.20 | 8.70 | 3.70 | 4.97 | 3.97 | 4.29 | 0.56 |
| 31.22 | 8.81 | 3.68 | 4.92 | 3.94 | 4.28 | 0.56 |
| 31.23 | 8.79 | 3.66 | 4.88 | 3.92 | 4.28 | 0.56 |
| 31.25 | 8.79 | 3.64 | 4.84 | 3.90 | 4.27 | 0.56 |
| 31.27 | 8.92 | 3.63 | 4.80 | 3.87 | 4.26 | 0.56 |
| 31.28 | 9.01 | 3.61 | 4.76 | 3.85 | 4.25 | 0.56 |
| 31.30 | 9.00 | 3.60 | 4.72 | 3.83 | 4.24 | 0.57 |
| 31.32 | 8.92 | 3.58 | 4.68 | 3.80 | 4.24 | 0.58 |
| 31.33 | 8.84 | 3.56 | 4.64 | 3.78 | 4.23 | 0.58 |
| 31.35 | 8.75 | 3.55 | 4.60 | 3.76 | 4.22 | 0.58 |
| 31.37 | 8.64 | 3.54 | 4.56 | 3.74 | 4.22 | 0.58 |
| 31.38 | 8.59 | 3.52 | 4.52 | 3.71 | 4.21 | 0.58 |
| 31.40 | 8.59 | 3.50 | 4.49 | 3.68 | 4.20 | 0.59 |
| 31.42 | 8.61 | 3.48 | 4.45 | 3.66 | 4.20 | 0.59 |
| 31.43 | 8.70 | 3.47 | 4.42 | 3.64 | 4.19 | 0.59 |
| 31.45 | 8.79 | 3.45 | 4.38 | 3.62 | 4.19 | 0.59 |
| 31.47 | 8.81 | 3.44 | 4.34 | 3.60 | 4.18 | 0.59 |
| 31.48 | 8.66 | 3.43 | 4.31 | 3.58 | 4.17 | 0.60 |
| 31.50 | 8.61 | 3.41 | 4.28 | 3.56 | 4.17 | 0.61 |
| 31.52 | 8.64 | 3.40 | 4.24 | 3.54 | 4.16 | 0.61 |
| 31.53 | 8.61 | 3.39 | 4.20 | 3.52 | 4.15 | 0.61 |
| 31.55 | 8.53 | 3.37 | 4.17 | 3.50 | 4.15 | 0.61 |
| 31.57 | 8.53 | 3.35 | 4.14 | 3.48 | 4.14 | 0.62 |
| 31.58 | 8.64 | 3.34 | 4.11 | 3.46 | 4.13 | 0.62 |
| 31.60 | 8.62 | 3.32 | 4.07 | 3.44 | 4.12 | 0.62 |





|       |      |      |      |      |      |      |
|-------|------|------|------|------|------|------|
| 31.62 | 8.61 | 3.31 | 4.04 | 3.42 | 4.12 | 0.62 |
| 31.63 | 8.59 | 3.29 | 4.01 | 3.40 | 4.11 | 0.63 |
| 31.65 | 8.55 | 3.28 | 3.98 | 3.38 | 4.11 | 0.64 |
| 31.67 | 8.59 | 3.27 | 3.95 | 3.36 | 4.10 | 0.63 |
| 31.68 | 8.62 | 3.26 | 3.92 | 3.34 | 4.09 | 0.63 |
| 31.70 | 8.49 | 3.24 | 3.89 | 3.32 | 4.09 | 0.63 |
| 31.72 | 8.42 | 3.22 | 3.85 | 3.30 | 4.09 | 0.64 |
| 31.73 | 8.58 | 3.21 | 3.82 | 3.29 | 4.08 | 0.65 |
| 31.75 | 8.66 | 3.20 | 3.79 | 3.27 | 4.08 | 0.65 |
| 31.77 | 8.61 | 3.18 | 3.77 | 3.25 | 4.08 | 0.65 |
| 31.78 | 8.53 | 3.17 | 3.74 | 3.23 | 4.07 | 0.66 |
| 31.80 | 8.53 | 3.16 | 3.71 | 3.22 | 4.07 | 0.66 |
| 31.82 | 8.52 | 3.15 | 3.68 | 3.20 | 4.06 | 0.66 |
| 31.83 | 8.52 | 3.13 | 3.65 | 3.18 | 4.06 | 0.67 |
| 31.85 | 8.55 | 3.12 | 3.63 | 3.16 | 4.05 | 0.67 |
| 31.87 | 8.59 | 3.11 | 3.60 | 3.14 | 4.05 | 0.67 |
| 31.88 | 8.62 | 3.09 | 3.58 | 3.13 | 4.05 | 0.67 |
| 31.90 | 8.58 | 3.08 | 3.55 | 3.11 | 4.04 | 0.67 |
| 31.92 | 8.55 | 3.07 | 3.52 | 3.09 | 4.04 | 0.67 |
| 31.93 | 8.55 | 3.06 | 3.50 | 3.08 | 4.04 | 0.68 |
| 31.95 | 8.49 | 3.05 | 3.47 | 3.06 | 4.04 | 0.68 |
| 31.97 | 8.42 | 3.04 | 3.44 | 3.04 | 4.03 | 0.69 |
| 31.98 | 8.39 | 3.02 | 3.42 | 3.03 | 4.03 | 0.69 |
| 32.00 | 8.44 | 3.01 | 3.40 | 3.02 | 4.02 | 0.69 |
| 32.02 | 8.55 | 3.00 | 3.37 | 3.00 | 4.02 | 0.69 |
| 32.03 | 8.59 | 2.99 | 3.35 | 2.98 | 4.02 | 0.70 |
| 32.05 | 8.66 | 2.98 | 3.32 | 2.97 | 4.01 | 0.70 |
| 32.07 | 8.58 | 2.96 | 3.30 | 2.95 | 4.01 | 0.70 |
| 32.08 | 8.44 | 2.95 | 3.28 | 2.93 | 4.00 | 0.71 |
| 32.10 | 8.41 | 2.94 | 3.25 | 2.92 | 4.00 | 0.71 |
| 32.12 | 8.45 | 2.93 | 3.23 | 2.91 | 4.00 | 0.71 |
| 32.13 | 8.53 | 2.92 | 3.21 | 2.89 | 4.00 | 0.71 |
| 32.15 | 8.52 | 2.91 | 3.19 | 2.87 | 4.00 | 0.71 |
| 32.17 | 8.44 | 2.90 | 3.16 | 2.86 | 4.00 | 0.72 |
| 32.18 | 8.39 | 2.89 | 3.14 | 2.85 | 3.99 | 0.72 |
| 32.20 | 8.33 | 2.88 | 3.12 | 2.83 | 3.99 | 0.72 |
| 32.22 | 8.35 | 2.86 | 3.10 | 2.82 | 3.98 | 0.73 |
| 32.23 | 8.38 | 2.86 | 3.08 | 2.80 | 3.98 | 0.73 |
| 32.25 | 8.36 | 2.85 | 3.06 | 2.79 | 3.98 | 0.73 |
| 32.27 | 8.49 | 2.84 | 3.03 | 2.77 | 3.98 | 0.73 |
| 32.28 | 8.50 | 2.82 | 3.01 | 2.76 | 3.97 | 0.73 |
| 32.30 | 8.33 | 2.81 | 2.99 | 2.74 | 3.97 | 0.74 |
| 32.32 | 8.22 | 2.80 | 2.97 | 2.73 | 3.97 | 0.75 |
| 32.33 | 8.25 | 2.79 | 2.95 | 2.72 | 3.97 | 0.75 |
| 32.35 | 8.27 | 2.78 | 2.93 | 2.71 | 3.96 | 0.75 |
| 32.37 | 8.18 | 2.77 | 2.91 | 2.69 | 3.96 | 0.76 |
| 32.38 | 8.22 | 2.76 | 2.90 | 2.68 | 3.96 | 0.76 |
| 32.40 | 8.42 | 2.76 | 2.88 | 2.66 | 3.96 | 0.77 |
| 32.42 | 8.49 | 2.75 | 2.86 | 2.65 | 3.95 | 0.77 |
| 32.43 | 8.47 | 2.74 | 2.84 | 2.64 | 3.95 | 0.77 |
| 32.45 | 8.42 | 2.73 | 2.82 | 2.63 | 3.95 | 0.77 |
| 32.47 | 8.39 | 2.71 | 2.81 | 2.61 | 3.95 | 0.77 |
| 32.48 | 8.36 | 2.70 | 2.79 | 2.60 | 3.95 | 0.78 |
| 32.50 | 8.28 | 2.70 | 2.77 | 2.58 | 3.94 | 0.78 |
| 32.52 | 8.22 | 2.69 | 2.75 | 2.57 | 3.94 | 0.78 |
| 32.53 | 8.28 | 2.68 | 2.73 | 2.56 | 3.94 | 0.78 |
| 32.55 | 8.33 | 2.67 | 2.72 | 2.55 | 3.94 | 0.79 |
| 32.57 | 8.30 | 2.66 | 2.70 | 2.53 | 3.93 | 0.78 |
| 32.58 | 8.27 | 2.65 | 2.68 | 2.52 | 3.93 | 0.79 |
| 32.60 | 8.16 | 2.64 | 2.66 | 2.51 | 3.93 | 0.79 |
| 32.62 | 8.10 | 2.63 | 2.65 | 2.50 | 3.93 | 0.80 |
| 32.63 | 8.10 | 2.62 | 2.63 | 2.48 | 3.93 | 0.81 |
| 32.65 | 8.08 | 2.61 | 2.61 | 2.47 | 3.93 | 0.81 |
| 32.67 | 8.19 | 2.60 | 2.60 | 2.46 | 3.92 | 0.81 |
| 32.68 | 8.18 | 2.59 | 2.58 | 2.45 | 3.92 | 0.81 |
| 32.70 | 8.04 | 2.59 | 2.57 | 2.44 | 3.92 | 0.81 |
| 32.72 | 8.01 | 2.58 | 2.55 | 2.43 | 3.92 | 0.82 |
| 32.73 | 7.99 | 2.57 | 2.54 | 2.41 | 3.92 | 0.82 |
| 32.75 | 8.01 | 2.56 | 2.52 | 2.40 | 3.92 | 0.82 |



|       |      |      |      |      |      |      |
|-------|------|------|------|------|------|------|
| 32.77 | 8.05 | 2.55 | 2.50 | 2.39 | 3.92 | 0.83 |
| 32.78 | 8.11 | 2.54 | 2.49 | 2.38 | 3.92 | 0.84 |
| 32.80 | 8.15 | 2.54 | 2.47 | 2.37 | 3.92 | 0.84 |
| 32.82 | 8.10 | 2.53 | 2.46 | 2.36 | 3.92 | 0.85 |
| 32.83 | 8.10 | 2.52 | 2.45 | 2.34 | 3.92 | 0.86 |
| 32.85 | 8.04 | 2.51 | 2.43 | 2.33 | 3.92 | 0.86 |
| 32.87 | 7.98 | 2.50 | 2.42 | 2.32 | 3.92 | 0.86 |
| 32.88 | 8.05 | 2.50 | 2.40 | 2.31 | 3.91 | 0.86 |
| 32.90 | 8.16 | 2.49 | 2.39 | 2.30 | 3.91 | 0.86 |
| 32.92 | 8.08 | 2.48 | 2.37 | 2.29 | 3.91 | 0.87 |
| 32.93 | 8.01 | 2.47 | 2.36 | 2.28 | 3.91 | 0.88 |
| 32.95 | 8.02 | 2.46 | 2.35 | 2.27 | 3.91 | 0.88 |
| 32.97 | 8.01 | 2.45 | 2.33 | 2.25 | 3.91 | 0.89 |
| 32.98 | 8.01 | 2.45 | 2.32 | 2.24 | 3.91 | 0.89 |
| 33.00 | 8.05 | 2.44 | 2.31 | 2.23 | 3.91 | 0.89 |
| 33.02 | 8.07 | 2.43 | 2.29 | 2.22 | 3.92 | 0.89 |
| 33.03 | 7.94 | 2.42 | 2.28 | 2.21 | 3.91 | 0.90 |
| 33.05 | 7.84 | 2.41 | 2.27 | 2.20 | 3.91 | 0.90 |
| 33.07 | 7.91 | 2.41 | 2.25 | 2.19 | 3.91 | 0.91 |
| 33.08 | 8.10 | 2.40 | 2.24 | 2.18 | 3.91 | 0.91 |
| 33.10 | 8.13 | 2.39 | 2.23 | 2.17 | 3.91 | 0.91 |
| 33.12 | 8.11 | 2.38 | 2.22 | 2.16 | 3.92 | 0.92 |
| 33.13 | 8.07 | 2.37 | 2.20 | 2.15 | 3.92 | 0.92 |
| 33.15 | 7.93 | 2.37 | 2.19 | 2.14 | 3.92 | 0.93 |
| 33.17 | 8.01 | 2.36 | 2.18 | 2.13 | 3.92 | 0.93 |
| 33.18 | 8.18 | 2.36 | 2.17 | 2.12 | 3.92 | 0.94 |
| 33.20 | 8.19 | 2.35 | 2.16 | 2.11 | 3.92 | 0.95 |
| 33.22 | 8.08 | 2.34 | 2.14 | 2.10 | 3.92 | 0.96 |
| 33.23 | 7.96 | 2.33 | 2.13 | 2.09 | 3.92 | 0.96 |
| 33.25 | 8.01 | 2.33 | 2.12 | 2.08 | 3.92 | 0.96 |
| 33.27 | 8.08 | 2.32 | 2.11 | 2.07 | 3.93 | 0.96 |
| 33.28 | 8.08 | 2.31 | 2.10 | 2.06 | 3.93 | 0.97 |
| 33.30 | 8.11 | 2.30 | 2.09 | 2.05 | 3.93 | 0.98 |
| 33.32 | 8.13 | 2.30 | 2.07 | 2.04 | 3.93 | 0.99 |
| 33.33 | 8.08 | 2.29 | 2.06 | 2.03 | 3.93 | 1.00 |
| 33.35 | 8.08 | 2.29 | 2.05 | 2.02 | 3.93 | 1.00 |
| 33.37 | 8.05 | 2.28 | 2.04 | 2.01 | 3.94 | 1.01 |
| 33.38 | 7.94 | 2.27 | 2.03 | 2.00 | 3.94 | 1.01 |
| 33.40 | 7.94 | 2.27 | 2.02 | 1.99 | 3.94 | 1.02 |
| 33.42 | 8.01 | 2.26 | 2.01 | 1.98 | 3.94 | 1.03 |
| 33.43 | 7.94 | 2.25 | 2.00 | 1.97 | 3.94 | 1.04 |
| 33.45 | 7.91 | 2.25 | 1.99 | 1.96 | 3.94 | 1.04 |
| 33.47 | 7.88 | 2.24 | 1.98 | 1.96 | 3.94 | 1.05 |
| 33.48 | 7.90 | 2.23 | 1.97 | 1.95 | 3.95 | 1.06 |
| 33.50 | 7.98 | 2.23 | 1.96 | 1.94 | 3.95 | 1.06 |
| 33.52 | 7.93 | 2.22 | 1.95 | 1.93 | 3.95 | 1.06 |
| 33.53 | 7.88 | 2.21 | 1.94 | 1.92 | 3.95 | 1.08 |
| 33.55 | 8.10 | 2.21 | 1.93 | 1.91 | 3.95 | 1.08 |
| 33.57 | 8.28 | 2.20 | 1.92 | 1.90 | 3.95 | 1.09 |
| 33.58 | 8.27 | 2.20 | 1.91 | 1.89 | 3.96 | 1.10 |
| 33.60 | 8.11 | 2.19 | 1.90 | 1.89 | 3.96 | 1.11 |
| 33.62 | 7.93 | 2.18 | 1.89 | 1.88 | 3.96 | 1.13 |
| 33.63 | 7.87 | 2.18 | 1.88 | 1.87 | 3.96 | 1.14 |
| 33.65 | 7.85 | 2.17 | 1.87 | 1.86 | 3.96 | 1.15 |
| 33.67 | 7.79 | 2.16 | 1.86 | 1.85 | 3.97 | 1.17 |
| 33.68 | 7.81 | 2.16 | 1.85 | 1.85 | 3.97 | 1.18 |
| 33.70 | 7.87 | 2.15 | 1.84 | 1.84 | 3.97 | 1.20 |
| 33.72 | 7.93 | 2.14 | 1.84 | 1.83 | 3.97 | 1.21 |
| 33.73 | 7.99 | 2.14 | 1.83 | 1.82 | 3.98 | 1.22 |
| 33.75 | 8.10 | 2.14 | 1.82 | 1.81 | 3.98 | 1.23 |
| 33.77 | 8.05 | 2.13 | 1.81 | 1.80 | 3.98 | 1.23 |
| 33.78 | 8.07 | 2.12 | 1.80 | 1.79 | 3.98 | 1.25 |
| 33.80 | 8.15 | 2.11 | 1.79 | 1.79 | 3.98 | 1.27 |
| 33.82 | 8.13 | 2.11 | 1.78 | 1.78 | 3.99 | 1.28 |
| 33.83 | 8.02 | 2.10 | 1.77 | 1.77 | 3.99 | 1.30 |
| 33.85 | 7.96 | 2.10 | 1.76 | 1.76 | 3.99 | 1.31 |
| 33.87 | 7.98 | 2.10 | 1.76 | 1.75 | 3.99 | 1.33 |
| 33.88 | 8.02 | 2.09 | 1.75 | 1.74 | 3.99 | 1.35 |
| 33.90 | 8.18 | 2.08 | 1.74 | 1.74 | 3.99 | 1.37 |



|       |      |      |      |      |      |      |
|-------|------|------|------|------|------|------|
| 33.92 | 8.13 | 2.08 | 1.73 | 1.73 | 4.00 | 1.39 |
| 33.93 | 7.98 | 2.08 | 1.72 | 1.72 | 4.00 | 1.42 |
| 33.95 | 7.98 | 2.07 | 1.72 | 1.72 | 4.00 | 1.45 |
| 33.97 | 7.91 | 2.06 | 1.71 | 1.71 | 4.00 | 1.47 |
| 33.98 | 7.93 | 2.06 | 1.70 | 1.70 | 4.00 | 1.49 |
| 34.00 | 8.07 | 2.05 | 1.69 | 1.69 | 4.01 | 1.51 |
| 34.02 | 8.02 | 2.05 | 1.69 | 1.68 | 4.01 | 1.54 |
| 34.03 | 7.96 | 2.04 | 1.68 | 1.67 | 4.01 | 1.57 |
| 34.05 | 8.05 | 2.04 | 1.67 | 1.67 | 4.02 | 1.60 |
| 34.07 | 8.13 | 2.03 | 1.66 | 1.66 | 4.02 | 1.62 |
| 34.08 | 8.02 | 2.03 | 1.65 | 1.66 | 4.02 | 1.65 |
| 34.10 | 7.94 | 2.02 | 1.64 | 1.65 | 4.02 | 1.69 |
| 34.12 | 7.98 | 2.02 | 1.63 | 1.64 | 4.02 | 1.73 |
| 34.13 | 7.94 | 2.01 | 1.63 | 1.64 | 4.02 | 1.76 |
| 34.15 | 7.88 | 2.00 | 1.62 | 1.63 | 4.03 | 1.80 |
| 34.17 | 7.88 | 2.00 | 1.62 | 1.62 | 4.03 | 1.84 |
| 34.18 | 7.94 | 2.00 | 1.61 | 1.61 | 4.03 | 1.88 |
| 34.20 | 7.94 | 2.00 | 1.60 | 1.61 | 4.03 | 1.92 |
| 34.22 | 7.84 | 1.99 | 1.59 | 1.60 | 4.03 | 1.97 |
| 34.23 | 7.81 | 1.99 | 1.58 | 1.59 | 4.04 | 2.01 |
| 34.25 | 7.87 | 1.99 | 1.58 | 1.58 | 4.04 | 2.06 |
| 34.27 | 7.93 | 1.98 | 1.57 | 1.58 | 4.04 | 2.11 |
| 34.28 | 7.90 | 1.97 | 1.56 | 1.58 | 4.05 | 2.16 |
| 34.30 | 7.77 | 1.97 | 1.56 | 1.58 | 4.05 | 2.22 |
| 34.32 | 7.74 | 1.96 | 1.55 | 1.57 | 4.05 | 2.28 |
| 34.33 | 7.87 | 1.96 | 1.54 | 1.56 | 4.05 | 2.35 |
| 34.35 | 7.99 | 1.96 | 1.54 | 1.55 | 4.05 | 2.41 |
| 34.37 | 7.88 | 1.96 | 1.53 | 1.54 | 4.05 | 2.47 |
| 34.38 | 7.82 | 1.95 | 1.52 | 1.54 | 4.06 | 2.54 |
| 34.40 | 7.94 | 1.95 | 1.52 | 1.53 | 4.06 | 2.62 |
| 34.42 | 7.98 | 1.95 | 1.51 | 1.52 | 4.06 | 2.69 |
| 34.43 | 7.90 | 1.94 | 1.50 | 1.52 | 4.06 | 2.76 |
| 34.45 | 7.88 | 1.94 | 1.50 | 1.51 | 4.06 | 2.85 |
| 34.47 | 7.91 | 1.93 | 1.49 | 1.51 | 4.07 | 2.93 |
| 34.48 | 7.90 | 1.93 | 1.49 | 1.50 | 4.07 | 3.01 |
| 34.50 | 7.87 | 1.92 | 1.48 | 1.49 | 4.07 | 3.11 |
| 34.52 | 7.91 | 1.92 | 1.47 | 1.48 | 4.07 | 3.20 |
| 34.53 | 7.84 | 1.92 | 1.46 | 1.48 | 4.07 | 3.30 |
| 34.55 | 7.74 | 1.92 | 1.46 | 1.48 | 4.07 | 3.40 |
| 34.57 | 7.79 | 1.91 | 1.45 | 1.47 | 4.07 | 3.51 |
| 34.58 | 7.82 | 1.91 | 1.45 | 1.46 | 4.08 | 3.62 |
| 34.60 | 7.88 | 1.91 | 1.44 | 1.46 | 4.08 | 3.73 |
| 34.62 | 8.01 | 1.90 | 1.43 | 1.45 | 4.08 | 3.85 |
| 34.63 | 8.01 | 1.89 | 1.43 | 1.44 | 4.08 | 3.97 |
| 34.65 | 7.98 | 1.89 | 1.42 | 1.44 | 4.08 | 4.09 |
| 34.67 | 7.93 | 1.89 | 1.42 | 1.43 | 4.08 | 4.22 |
| 34.68 | 7.73 | 1.89 | 1.41 | 1.43 | 4.08 | 4.36 |
| 34.70 | 7.67 | 1.89 | 1.40 | 1.43 | 4.08 | 4.50 |
| 34.72 | 7.85 | 1.89 | 1.39 | 1.43 | 4.08 | 4.64 |
| 34.73 | 7.96 | 1.88 | 1.39 | 1.42 | 4.07 | 4.79 |
| 34.75 | 7.99 | 1.88 | 1.39 | 1.41 | 4.07 | 4.95 |
| 34.77 | 7.88 | 1.88 | 1.38 | 1.40 | 4.07 | 5.11 |
| 34.78 | 7.73 | 1.87 | 1.38 | 1.39 | 4.07 | 5.28 |
| 34.80 | 7.79 | 1.87 | 1.37 | 1.39 | 4.07 | 5.46 |
| 34.82 | 7.84 | 1.86 | 1.37 | 1.39 | 4.06 | 5.64 |
| 34.83 | 7.87 | 1.86 | 1.36 | 1.38 | 4.06 | 5.82 |
| 34.85 | 7.99 | 1.86 | 1.35 | 1.38 | 4.06 | 6.02 |
| 34.87 | 8.04 | 1.86 | 1.35 | 1.37 | 4.05 | 6.21 |
| 34.88 | 7.98 | 1.85 | 1.34 | 1.37 | 4.05 | 6.42 |
| 34.90 | 7.98 | 1.85 | 1.34 | 1.36 | 4.04 | 6.63 |
| 34.92 | 7.99 | 1.84 | 1.33 | 1.36 | 4.04 | 6.84 |
| 34.93 | 7.90 | 1.84 | 1.33 | 1.35 | 4.03 | 7.06 |
| 34.95 | 7.76 | 1.84 | 1.32 | 1.35 | 4.02 | 7.30 |
| 34.97 | 7.73 | 1.84 | 1.32 | 1.34 | 4.02 | 7.54 |
| 34.98 | 7.91 | 1.84 | 1.31 | 1.33 | 4.01 | 7.78 |
| 35.00 | 7.96 | 1.84 | 1.30 | 1.33 | 4.01 | 8.03 |
| 35.02 | 7.81 | 1.84 | 1.30 | 1.33 | 4.00 | 8.29 |
| 35.03 | 7.76 | 1.83 | 1.29 | 1.32 | 3.98 | 8.56 |
| 35.05 | 7.81 | 1.83 | 1.29 | 1.32 | 3.98 | 8.83 |



|       |      |      |      |      |      |       |
|-------|------|------|------|------|------|-------|
| 35.07 | 7.96 | 1.82 | 1.28 | 1.31 | 3.96 | 9.11  |
| 35.08 | 8.15 | 1.82 | 1.28 | 1.31 | 3.95 | 9.40  |
| 35.10 | 8.07 | 1.82 | 1.27 | 1.31 | 3.94 | 9.70  |
| 35.12 | 7.84 | 1.82 | 1.27 | 1.30 | 3.93 | 10.00 |
| 35.13 | 7.79 | 1.82 | 1.27 | 1.29 | 3.92 | 10.31 |
| 35.15 | 7.85 | 1.81 | 1.26 | 1.29 | 3.90 | 10.63 |
| 35.17 | 7.91 | 1.81 | 1.26 | 1.28 | 3.89 | 10.96 |
| 35.18 | 7.91 | 1.81 | 1.25 | 1.28 | 3.88 | 11.30 |
| 35.20 | 7.87 | 1.80 | 1.25 | 1.27 | 3.86 | 11.64 |
| 35.22 | 7.82 | 1.80 | 1.24 | 1.27 | 3.85 | 12.00 |
| 35.23 | 7.82 | 1.80 | 1.24 | 1.27 | 3.83 | 12.36 |
| 35.25 | 7.77 | 1.80 | 1.23 | 1.26 | 3.82 | 12.74 |
| 35.27 | 7.77 | 1.79 | 1.23 | 1.25 | 3.80 | 13.12 |
| 35.28 | 7.94 | 1.79 | 1.22 | 1.25 | 3.79 | 13.50 |
| 35.30 | 8.04 | 1.79 | 1.22 | 1.25 | 3.77 | 13.89 |
| 35.32 | 7.90 | 1.78 | 1.21 | 1.24 | 3.76 | 14.30 |
| 35.33 | 7.74 | 1.78 | 1.21 | 1.24 | 3.74 | 14.72 |
| 35.35 | 7.81 | 1.78 | 1.21 | 1.23 | 3.72 | 15.14 |
| 35.37 | 7.90 | 1.78 | 1.21 | 1.23 | 3.70 | 15.58 |
| 35.38 | 7.90 | 1.77 | 1.20 | 1.23 | 3.69 | 16.02 |
| 35.40 | 7.90 | 1.77 | 1.20 | 1.22 | 3.67 | 16.47 |
| 35.42 | 7.85 | 1.76 | 1.19 | 1.22 | 3.66 | 16.92 |
| 35.43 | 7.87 | 1.76 | 1.19 | 1.21 | 3.64 | 17.39 |
| 35.45 | 7.98 | 1.76 | 1.18 | 1.21 | 3.63 | 17.86 |
| 35.47 | 7.93 | 1.76 | 1.18 | 1.20 | 3.61 | 18.35 |
| 35.48 | 7.91 | 1.75 | 1.18 | 1.20 | 3.59 | 18.84 |
| 35.50 | 7.96 | 1.75 | 1.17 | 1.19 | 3.58 | 19.34 |
| 35.52 | 7.98 | 1.75 | 1.17 | 1.19 | 3.56 | 19.85 |
| 35.53 | 7.91 | 1.74 | 1.16 | 1.19 | 3.55 | 20.37 |
| 35.55 | 7.82 | 1.74 | 1.16 | 1.18 | 3.54 | 20.89 |
| 35.57 | 7.84 | 1.74 | 1.15 | 1.18 | 3.52 | 21.43 |
| 35.58 | 7.85 | 1.74 | 1.15 | 1.17 | 3.50 | 21.99 |
| 35.60 | 7.81 | 1.73 | 1.15 | 1.17 | 3.49 | 22.55 |
| 35.62 | 7.88 | 1.73 | 1.14 | 1.17 | 3.47 | 23.11 |
| 35.63 | 7.88 | 1.73 | 1.14 | 1.16 | 3.46 | 23.69 |
| 35.65 | 7.81 | 1.72 | 1.14 | 1.16 | 3.45 | 24.27 |
| 35.67 | 7.84 | 1.72 | 1.13 | 1.16 | 3.43 | 24.84 |
| 35.68 | 7.85 | 1.71 | 1.13 | 1.15 | 3.42 | 25.43 |
| 35.70 | 7.74 | 1.71 | 1.13 | 1.15 | 3.40 | 26.03 |
| 35.72 | 7.70 | 1.71 | 1.12 | 1.14 | 3.39 | 26.64 |
| 35.73 | 7.84 | 1.70 | 1.12 | 1.14 | 3.38 | 27.25 |
| 35.75 | 7.93 | 1.70 | 1.12 | 1.14 | 3.37 | 27.88 |
| 35.77 | 7.91 | 1.70 | 1.11 | 1.13 | 3.36 | 28.51 |
| 35.78 | 7.77 | 1.70 | 1.11 | 1.13 | 3.34 | 29.16 |
| 35.80 | 7.67 | 1.69 | 1.10 | 1.13 | 3.33 | 29.82 |
| 35.82 | 7.76 | 1.68 | 1.10 | 1.12 | 3.32 | 30.47 |
| 35.83 | 7.94 | 1.68 | 1.10 | 1.12 | 3.31 | 31.13 |
| 35.85 | 8.04 | 1.68 | 1.09 | 1.11 | 3.30 | 31.79 |
| 35.87 | 7.99 | 1.68 | 1.09 | 1.11 | 3.29 | 32.46 |
| 35.88 | 7.90 | 1.67 | 1.09 | 1.11 | 3.28 | 33.14 |
| 35.90 | 7.79 | 1.67 | 1.09 | 1.10 | 3.27 | 33.83 |
| 35.92 | 7.76 | 1.67 | 1.08 | 1.10 | 3.26 | 34.52 |
| 35.93 | 7.76 | 1.66 | 1.08 | 1.09 | 3.25 | 35.22 |
| 35.95 | 7.87 | 1.66 | 1.07 | 1.09 | 3.24 | 35.92 |
| 35.97 | 8.04 | 1.65 | 1.07 | 1.09 | 3.23 | 36.63 |
| 35.98 | 8.05 | 1.65 | 1.07 | 1.09 | 3.22 | 37.34 |
| 36.00 | 8.02 | 1.65 | 1.06 | 1.08 | 3.21 | 38.06 |
| 36.02 | 7.93 | 1.64 | 1.06 | 1.08 | 3.20 | 38.78 |
| 36.03 | 7.91 | 1.64 | 1.06 | 1.07 | 3.19 | 39.49 |
| 36.05 | 7.96 | 1.64 | 1.06 | 1.07 | 3.18 | 40.22 |
| 36.07 | 7.91 | 1.64 | 1.05 | 1.07 | 3.17 | 40.96 |
| 36.08 | 7.85 | 1.63 | 1.05 | 1.06 | 3.17 | 41.70 |
| 36.10 | 7.81 | 1.63 | 1.05 | 1.06 | 3.16 | 42.43 |
| 36.12 | 7.81 | 1.62 | 1.05 | 1.06 | 3.15 | 43.18 |
| 36.13 | 7.77 | 1.62 | 1.04 | 1.05 | 3.14 | 43.92 |
| 36.15 | 7.70 | 1.62 | 1.04 | 1.05 | 3.14 | 44.67 |
| 36.17 | 7.76 | 1.61 | 1.04 | 1.04 | 3.13 | 45.42 |
| 36.18 | 7.73 | 1.61 | 1.03 | 1.04 | 3.12 | 46.17 |
| 36.20 | 7.65 | 1.60 | 1.03 | 1.04 | 3.11 | 46.92 |



|       |      |      |      |      |      |       |
|-------|------|------|------|------|------|-------|
| 36.22 | 7.67 | 1.60 | 1.03 | 1.04 | 3.10 | 47.68 |
| 36.23 | 7.65 | 1.59 | 1.02 | 1.03 | 3.10 | 48.44 |
| 36.25 | 7.59 | 1.59 | 1.02 | 1.03 | 3.09 | 49.20 |
| 36.27 | 7.60 | 1.59 | 1.02 | 1.02 | 3.08 | 49.95 |
| 36.28 | 7.56 | 1.59 | 1.02 | 1.02 | 3.07 | 50.71 |
| 36.30 | 7.59 | 1.58 | 1.02 | 1.01 | 3.07 | 51.48 |
| 36.32 | 7.68 | 1.57 | 1.01 | 1.01 | 3.06 | 52.24 |
| 36.33 | 7.70 | 1.57 | 1.01 | 1.01 | 3.06 | 52.99 |
| 36.35 | 7.68 | 1.57 | 1.00 | 1.01 | 3.05 | 53.75 |
| 36.37 | 7.74 | 1.56 | 1.00 | 1.00 | 3.05 | 54.51 |
| 36.38 | 7.76 | 1.56 | 1.00 | 1.00 | 3.04 | 55.27 |
| 36.40 | 7.65 | 1.56 | 1.00 | 1.00 | 3.03 | 56.03 |
| 36.42 | 7.62 | 1.56 | 1.00 | 0.99 | 3.03 | 56.78 |
| 36.43 | 7.68 | 1.55 | 0.99 | 0.99 | 3.02 | 57.54 |
| 36.45 | 7.62 | 1.55 | 0.99 | 0.99 | 3.02 | 58.30 |
| 36.47 | 7.56 | 1.55 | 0.99 | 0.98 | 3.01 | 59.05 |
| 36.48 | 7.60 | 1.55 | 0.98 | 0.98 | 3.00 | 59.80 |
| 36.50 | 7.64 | 1.54 | 0.98 | 0.98 | 3.00 | 60.55 |
| 36.52 | 7.65 | 1.54 | 0.98 | 0.97 | 2.99 | 61.28 |
| 36.53 | 7.67 | 1.53 | 0.98 | 0.97 | 2.99 | 62.02 |
| 36.55 | 7.64 | 1.53 | 0.98 | 0.96 | 2.98 | 62.76 |
| 36.57 | 7.57 | 1.53 | 0.98 | 0.96 | 2.97 | 63.49 |
| 36.58 | 7.60 | 1.53 | 0.97 | 0.96 | 2.97 | 64.21 |
| 36.60 | 7.73 | 1.52 | 0.97 | 0.96 | 2.96 | 64.93 |
| 36.62 | 7.71 | 1.52 | 0.97 | 0.96 | 2.96 | 65.65 |
| 36.63 | 7.57 | 1.52 | 0.96 | 0.95 | 2.95 | 66.36 |
| 36.65 | 7.60 | 1.51 | 0.96 | 0.95 | 2.95 | 67.08 |
| 36.67 | 7.70 | 1.51 | 0.96 | 0.95 | 2.94 | 67.79 |
| 36.68 | 7.68 | 1.51 | 0.96 | 0.94 | 2.94 | 68.49 |
| 36.70 | 7.64 | 1.50 | 0.96 | 0.94 | 2.94 | 69.18 |
| 36.72 | 7.51 | 1.50 | 0.96 | 0.93 | 2.93 | 69.87 |
| 36.73 | 7.59 | 1.50 | 0.95 | 0.93 | 2.92 | 70.56 |
| 36.75 | 7.67 | 1.49 | 0.95 | 0.93 | 2.92 | 71.24 |
| 36.77 | 7.60 | 1.49 | 0.95 | 0.92 | 2.91 | 71.91 |
| 36.78 | 7.57 | 1.49 | 0.95 | 0.92 | 2.91 | 72.58 |
| 36.80 | 7.57 | 1.49 | 0.94 | 0.92 | 2.90 | 73.23 |
| 36.82 | 7.56 | 1.48 | 0.94 | 0.92 | 2.90 | 73.88 |
| 36.83 | 7.53 | 1.47 | 0.94 | 0.91 | 2.90 | 74.53 |
| 36.85 | 7.45 | 1.47 | 0.94 | 0.91 | 2.89 | 75.18 |
| 36.87 | 7.51 | 1.48 | 0.94 | 0.90 | 2.89 | 75.81 |
| 36.88 | 7.64 | 1.48 | 0.94 | 0.90 | 2.88 | 76.44 |
| 36.90 | 7.68 | 1.47 | 0.93 | 0.90 | 2.88 | 77.05 |
| 36.92 | 7.64 | 1.47 | 0.93 | 0.89 | 2.87 | 77.66 |
| 36.93 | 7.56 | 1.47 | 0.93 | 0.89 | 2.87 | 78.27 |
| 36.95 | 7.53 | 1.46 | 0.93 | 0.89 | 2.87 | 78.86 |
| 36.97 | 7.53 | 1.46 | 0.93 | 0.88 | 2.86 | 79.45 |
| 36.98 | 7.51 | 1.46 | 0.92 | 0.88 | 2.86 | 80.02 |
| 37.00 | 7.53 | 1.45 | 0.92 | 0.88 | 2.86 | 80.60 |
| 37.02 | 7.62 | 1.45 | 0.92 | 0.88 | 2.85 | 81.17 |
| 37.03 | 7.67 | 1.45 | 0.92 | 0.87 | 2.85 | 81.72 |
| 37.05 | 7.68 | 1.44 | 0.92 | 0.87 | 2.84 | 82.26 |
| 37.07 | 7.68 | 1.44 | 0.92 | 0.87 | 2.84 | 82.80 |
| 37.08 | 7.54 | 1.43 | 0.91 | 0.86 | 2.83 | 83.34 |
| 37.10 | 7.45 | 1.43 | 0.91 | 0.86 | 2.83 | 83.86 |
| 37.12 | 7.45 | 1.43 | 0.91 | 0.86 | 2.83 | 84.37 |
| 37.13 | 7.43 | 1.43 | 0.91 | 0.86 | 2.82 | 84.87 |
| 37.15 | 7.48 | 1.43 | 0.91 | 0.85 | 2.82 | 85.36 |
| 37.17 | 7.57 | 1.42 | 0.90 | 0.85 | 2.81 | 85.85 |
| 37.18 | 7.68 | 1.42 | 0.90 | 0.84 | 2.80 | 86.33 |
| 37.20 | 7.68 | 1.42 | 0.90 | 0.84 | 2.80 | 86.81 |
| 37.22 | 7.48 | 1.41 | 0.90 | 0.84 | 2.80 | 87.27 |
| 37.23 | 7.31 | 1.41 | 0.90 | 0.83 | 2.79 | 87.72 |
| 37.25 | 7.33 | 1.41 | 0.90 | 0.83 | 2.79 | 88.16 |
| 37.27 | 7.36 | 1.41 | 0.89 | 0.83 | 2.79 | 88.59 |
| 37.28 | 7.39 | 1.41 | 0.89 | 0.83 | 2.78 | 89.02 |
| 37.30 | 7.53 | 1.40 | 0.89 | 0.83 | 2.78 | 89.43 |
| 37.32 | 7.65 | 1.40 | 0.89 | 0.82 | 2.77 | 89.84 |
| 37.33 | 7.68 | 1.40 | 0.89 | 0.82 | 2.77 | 90.23 |
| 37.35 | 7.70 | 1.40 | 0.89 | 0.81 | 2.76 | 90.63 |



|       |      |      |      |      |      |        |
|-------|------|------|------|------|------|--------|
| 37.37 | 7.71 | 1.39 | 0.89 | 0.81 | 2.76 | 91.01  |
| 37.38 | 7.71 | 1.39 | 0.88 | 0.81 | 2.76 | 91.38  |
| 37.40 | 7.64 | 1.39 | 0.88 | 0.80 | 2.75 | 91.74  |
| 37.42 | 7.53 | 1.38 | 0.88 | 0.80 | 2.75 | 92.10  |
| 37.43 | 7.48 | 1.38 | 0.88 | 0.80 | 2.75 | 92.45  |
| 37.45 | 7.47 | 1.38 | 0.88 | 0.80 | 2.74 | 92.78  |
| 37.47 | 7.54 | 1.38 | 0.88 | 0.79 | 2.74 | 93.10  |
| 37.48 | 7.59 | 1.38 | 0.88 | 0.79 | 2.73 | 93.42  |
| 37.50 | 7.53 | 1.38 | 0.88 | 0.79 | 2.73 | 93.74  |
| 37.52 | 7.47 | 1.37 | 0.88 | 0.78 | 2.72 | 94.04  |
| 37.53 | 7.40 | 1.37 | 0.87 | 0.78 | 2.72 | 94.33  |
| 37.55 | 7.42 | 1.37 | 0.87 | 0.78 | 2.72 | 94.61  |
| 37.57 | 7.42 | 1.36 | 0.87 | 0.77 | 2.71 | 94.89  |
| 37.58 | 7.47 | 1.36 | 0.87 | 0.77 | 2.71 | 95.16  |
| 37.60 | 7.59 | 1.36 | 0.87 | 0.76 | 2.70 | 95.42  |
| 37.62 | 7.59 | 1.36 | 0.87 | 0.76 | 2.70 | 95.67  |
| 37.63 | 7.59 | 1.35 | 0.87 | 0.76 | 2.69 | 95.92  |
| 37.65 | 7.64 | 1.35 | 0.86 | 0.75 | 2.69 | 96.17  |
| 37.67 | 7.50 | 1.34 | 0.86 | 0.75 | 2.69 | 96.40  |
| 37.68 | 7.48 | 1.35 | 0.86 | 0.75 | 2.68 | 96.61  |
| 37.70 | 7.54 | 1.34 | 0.86 | 0.74 | 2.68 | 96.82  |
| 37.72 | 7.48 | 1.34 | 0.86 | 0.74 | 2.67 | 97.02  |
| 37.73 | 7.50 | 1.34 | 0.86 | 0.73 | 2.67 | 97.21  |
| 37.75 | 7.59 | 1.34 | 0.86 | 0.73 | 2.67 | 97.40  |
| 37.77 | 7.71 | 1.34 | 0.86 | 0.73 | 2.66 | 97.58  |
| 37.78 | 7.76 | 1.33 | 0.86 | 0.73 | 2.65 | 97.76  |
| 37.80 | 7.59 | 1.33 | 0.86 | 0.72 | 2.65 | 97.94  |
| 37.82 | 7.57 | 1.32 | 0.86 | 0.72 | 2.64 | 98.10  |
| 37.83 | 7.67 | 1.32 | 0.86 | 0.71 | 2.64 | 98.24  |
| 37.85 | 7.54 | 1.32 | 0.85 | 0.71 | 2.64 | 98.38  |
| 37.87 | 7.37 | 1.32 | 0.85 | 0.71 | 2.64 | 98.52  |
| 37.88 | 7.37 | 1.32 | 0.85 | 0.71 | 2.63 | 98.65  |
| 37.90 | 7.48 | 1.31 | 0.85 | 0.70 | 2.63 | 98.78  |
| 37.92 | 7.54 | 1.31 | 0.85 | 0.70 | 2.62 | 98.90  |
| 37.93 | 7.56 | 1.31 | 0.85 | 0.70 | 2.62 | 99.01  |
| 37.95 | 7.65 | 1.31 | 0.85 | 0.70 | 2.61 | 99.12  |
| 37.97 | 7.60 | 1.30 | 0.85 | 0.69 | 2.61 | 99.23  |
| 37.98 | 7.54 | 1.30 | 0.84 | 0.69 | 2.60 | 99.32  |
| 38.00 | 7.53 | 1.30 | 0.84 | 0.69 | 2.60 | 99.41  |
| 38.02 | 7.54 | 1.30 | 0.84 | 0.68 | 2.60 | 99.49  |
| 38.03 | 7.59 | 1.30 | 0.84 | 0.68 | 2.59 | 99.55  |
| 38.05 | 7.64 | 1.29 | 0.84 | 0.68 | 2.59 | 99.61  |
| 38.07 | 7.71 | 1.29 | 0.84 | 0.67 | 2.58 | 99.67  |
| 38.08 | 7.71 | 1.28 | 0.84 | 0.67 | 2.58 | 99.72  |
| 38.10 | 7.65 | 1.28 | 0.84 | 0.67 | 2.57 | 99.78  |
| 38.12 | 7.56 | 1.28 | 0.84 | 0.67 | 2.57 | 99.83  |
| 38.13 | 7.59 | 1.27 | 0.84 | 0.66 | 2.56 | 99.87  |
| 38.15 | 7.70 | 1.27 | 0.84 | 0.66 | 2.56 | 99.90  |
| 38.17 | 7.68 | 1.27 | 0.84 | 0.66 | 2.56 | 99.93  |
| 38.18 | 7.64 | 1.27 | 0.84 | 0.66 | 2.55 | 99.96  |
| 38.20 | 7.73 | 1.27 | 0.84 | 0.65 | 2.55 | 99.98  |
| 38.22 | 7.73 | 1.27 | 0.84 | 0.65 | 2.55 | 99.99  |
| 38.23 | 7.62 | 1.27 | 0.83 | 0.64 | 2.54 | 100.00 |
| 38.25 | 7.67 | 1.26 | 0.83 | 0.64 | 2.54 | 100.00 |
| 38.27 | 7.68 | 1.26 | 0.83 | 0.64 | 2.53 | 99.99  |
| 38.28 | 7.62 | 1.26 | 0.83 | 0.64 | 2.53 | 99.98  |
| 38.30 | 7.57 | 1.25 | 0.83 | 0.63 | 2.52 | 99.98  |
| 38.32 | 7.54 | 1.25 | 0.83 | 0.63 | 2.52 | 99.96  |
| 38.33 | 7.51 | 1.25 | 0.83 | 0.63 | 2.51 | 99.94  |
| 38.35 | 7.54 | 1.25 | 0.83 | 0.63 | 2.51 | 99.91  |
| 38.37 | 7.59 | 1.25 | 0.82 | 0.62 | 2.51 | 99.88  |
| 38.38 | 7.48 | 1.24 | 0.82 | 0.62 | 2.50 | 99.85  |
| 38.40 | 7.33 | 1.24 | 0.82 | 0.61 | 2.50 | 99.81  |
| 38.42 | 7.31 | 1.24 | 0.82 | 0.61 | 2.49 | 99.76  |
| 38.43 | 7.40 | 1.24 | 0.82 | 0.61 | 2.49 | 99.72  |
| 38.45 | 7.56 | 1.23 | 0.82 | 0.60 | 2.48 | 99.67  |
| 38.47 | 7.65 | 1.23 | 0.82 | 0.60 | 2.48 | 99.62  |
| 38.48 | 7.70 | 1.23 | 0.82 | 0.60 | 2.47 | 99.56  |
| 38.50 | 7.64 | 1.23 | 0.82 | 0.60 | 2.47 | 99.50  |



|       |      |      |      |      |      |       |
|-------|------|------|------|------|------|-------|
| 38.52 | 7.59 | 1.22 | 0.82 | 0.59 | 2.47 | 99.44 |
| 38.53 | 7.62 | 1.22 | 0.82 | 0.59 | 2.46 | 99.37 |
| 38.55 | 7.59 | 1.22 | 0.82 | 0.59 | 2.46 | 99.30 |
| 38.57 | 7.56 | 1.22 | 0.82 | 0.58 | 2.45 | 99.21 |
| 38.58 | 7.53 | 1.22 | 0.82 | 0.58 | 2.45 | 99.13 |
| 38.60 | 7.62 | 1.22 | 0.82 | 0.58 | 2.45 | 99.06 |
| 38.62 | 7.74 | 1.21 | 0.82 | 0.57 | 2.44 | 98.97 |
| 38.63 | 7.79 | 1.21 | 0.81 | 0.57 | 2.43 | 98.88 |
| 38.65 | 7.77 | 1.21 | 0.81 | 0.57 | 2.43 | 98.79 |
| 38.67 | 7.74 | 1.21 | 0.81 | 0.57 | 2.42 | 98.69 |
| 38.68 | 7.68 | 1.20 | 0.81 | 0.57 | 2.42 | 98.59 |
| 38.70 | 7.62 | 1.20 | 0.81 | 0.56 | 2.42 | 98.49 |
| 38.72 | 7.62 | 1.20 | 0.81 | 0.56 | 2.41 | 98.38 |
| 38.73 | 7.59 | 1.20 | 0.81 | 0.56 | 2.41 | 98.28 |
| 38.75 | 7.60 | 1.20 | 0.81 | 0.56 | 2.40 | 98.17 |
| 38.77 | 7.67 | 1.19 | 0.81 | 0.55 | 2.40 | 98.05 |
| 38.78 | 7.51 | 1.19 | 0.81 | 0.55 | 2.39 | 97.94 |
| 38.80 | 7.39 | 1.19 | 0.81 | 0.55 | 2.39 | 97.82 |
| 38.82 | 7.50 | 1.19 | 0.80 | 0.55 | 2.38 | 97.70 |
| 38.83 | 7.57 | 1.19 | 0.80 | 0.54 | 2.38 | 97.57 |
| 38.85 | 7.60 | 1.19 | 0.80 | 0.54 | 2.37 | 97.44 |
| 38.87 | 7.59 | 1.19 | 0.80 | 0.54 | 2.37 | 97.31 |
| 38.88 | 7.59 | 1.18 | 0.80 | 0.54 | 2.36 | 97.17 |
| 38.90 | 7.67 | 1.18 | 0.80 | 0.53 | 2.36 | 97.04 |
| 38.92 | 7.71 | 1.17 | 0.80 | 0.53 | 2.35 | 96.90 |
| 38.93 | 7.60 | 1.17 | 0.80 | 0.53 | 2.35 | 96.77 |
| 38.95 | 7.59 | 1.17 | 0.80 | 0.52 | 2.35 | 96.63 |
| 38.97 | 7.57 | 1.17 | 0.80 | 0.52 | 2.34 | 96.48 |
| 38.98 | 7.47 | 1.16 | 0.79 | 0.52 | 2.34 | 96.33 |
| 39.00 | 7.54 | 1.16 | 0.79 | 0.52 | 2.34 | 96.18 |
| 39.02 | 7.59 | 1.16 | 0.79 | 0.51 | 2.33 | 96.03 |
| 39.03 | 7.62 | 1.16 | 0.79 | 0.51 | 2.33 | 95.88 |
| 39.05 | 7.65 | 1.16 | 0.79 | 0.51 | 2.32 | 95.73 |
| 39.07 | 7.64 | 1.15 | 0.79 | 0.51 | 2.32 | 95.58 |
| 39.08 | 7.65 | 1.15 | 0.79 | 0.50 | 2.31 | 95.41 |
| 39.10 | 7.64 | 1.15 | 0.79 | 0.50 | 2.31 | 95.25 |
| 39.12 | 7.59 | 1.15 | 0.79 | 0.50 | 2.30 | 95.09 |
| 39.13 | 7.59 | 1.15 | 0.79 | 0.50 | 2.30 | 94.93 |
| 39.15 | 7.57 | 1.14 | 0.79 | 0.49 | 2.30 | 94.77 |
| 39.17 | 7.59 | 1.15 | 0.78 | 0.49 | 2.29 | 94.60 |
| 39.18 | 7.68 | 1.15 | 0.78 | 0.49 | 2.28 | 94.42 |
| 39.20 | 7.71 | 1.14 | 0.78 | 0.49 | 2.28 | 94.26 |
| 39.22 | 7.71 | 1.14 | 0.78 | 0.48 | 2.28 | 94.10 |
| 39.23 | 7.64 | 1.14 | 0.78 | 0.48 | 2.27 | 93.92 |
| 39.25 | 7.54 | 1.13 | 0.78 | 0.48 | 2.27 | 93.74 |
| 39.27 | 7.57 | 1.13 | 0.78 | 0.48 | 2.27 | 93.57 |
| 39.28 | 7.50 | 1.13 | 0.78 | 0.48 | 2.26 | 93.40 |
| 39.30 | 7.37 | 1.13 | 0.78 | 0.48 | 2.25 | 93.22 |
| 39.32 | 7.57 | 1.13 | 0.77 | 0.47 | 2.25 | 93.05 |
| 39.33 | 7.79 | 1.12 | 0.77 | 0.47 | 2.25 | 92.87 |
| 39.35 | 7.76 | 1.12 | 0.77 | 0.47 | 2.24 | 92.69 |
| 39.37 | 7.64 | 1.12 | 0.77 | 0.46 | 2.24 | 92.50 |
| 39.38 | 7.57 | 1.11 | 0.77 | 0.46 | 2.23 | 92.32 |
| 39.40 | 7.65 | 1.11 | 0.77 | 0.46 | 2.23 | 92.13 |
| 39.42 | 7.70 | 1.12 | 0.77 | 0.46 | 2.22 | 91.94 |
| 39.43 | 7.60 | 1.11 | 0.77 | 0.45 | 2.22 | 91.75 |
| 39.45 | 7.45 | 1.11 | 0.77 | 0.45 | 2.22 | 91.56 |
| 39.47 | 7.43 | 1.11 | 0.77 | 0.45 | 2.21 | 91.36 |
| 39.48 | 7.50 | 1.11 | 0.77 | 0.45 | 2.21 | 91.17 |
| 39.50 | 7.45 | 1.11 | 0.76 | 0.44 | 2.21 | 90.97 |
| 39.52 | 7.43 | 1.11 | 0.76 | 0.44 | 2.20 | 90.77 |
| 39.53 | 7.51 | 1.10 | 0.76 | 0.43 | 2.20 | 90.57 |
| 39.55 | 7.51 | 1.10 | 0.76 | 0.43 | 2.19 | 90.37 |
| 39.57 | 7.51 | 1.10 | 0.76 | 0.43 | 2.18 | 90.18 |
| 39.58 | 7.48 | 1.09 | 0.76 | 0.43 | 2.18 | 89.99 |
| 39.60 | 7.50 | 1.09 | 0.76 | 0.43 | 2.18 | 89.79 |
| 39.62 | 7.48 | 1.09 | 0.76 | 0.43 | 2.17 | 89.59 |
| 39.63 | 7.50 | 1.09 | 0.75 | 0.42 | 2.17 | 89.39 |
| 39.65 | 7.48 | 1.09 | 0.75 | 0.42 | 2.17 | 89.18 |



|       |      |      |      |      |      |       |
|-------|------|------|------|------|------|-------|
| 39.67 | 7.40 | 1.09 | 0.75 | 0.42 | 2.16 | 88.98 |
| 39.68 | 7.43 | 1.08 | 0.75 | 0.42 | 2.16 | 88.78 |
| 39.70 | 7.57 | 1.08 | 0.75 | 0.42 | 2.15 | 88.57 |
| 39.72 | 7.59 | 1.08 | 0.75 | 0.41 | 2.15 | 88.37 |
| 39.73 | 7.57 | 1.08 | 0.75 | 0.41 | 2.14 | 88.17 |
| 39.75 | 7.57 | 1.08 | 0.75 | 0.41 | 2.14 | 87.97 |
| 39.77 | 7.59 | 1.08 | 0.75 | 0.41 | 2.14 | 87.75 |
| 39.78 | 7.62 | 1.07 | 0.74 | 0.40 | 2.13 | 87.55 |
| 39.80 | 7.62 | 1.07 | 0.75 | 0.40 | 2.13 | 87.34 |
| 39.82 | 7.59 | 1.07 | 0.75 | 0.40 | 2.12 | 87.13 |
| 39.83 | 7.57 | 1.07 | 0.74 | 0.39 | 2.12 | 86.92 |
| 39.85 | 7.56 | 1.07 | 0.74 | 0.39 | 2.11 | 86.70 |
| 39.87 | 7.54 | 1.07 | 0.74 | 0.39 | 2.11 | 86.48 |
| 39.88 | 7.62 | 1.07 | 0.74 | 0.39 | 2.11 | 86.27 |
| 39.90 | 7.70 | 1.06 | 0.74 | 0.39 | 2.10 | 86.06 |
| 39.92 | 7.73 | 1.06 | 0.74 | 0.39 | 2.10 | 85.85 |
| 39.93 | 7.73 | 1.06 | 0.74 | 0.39 | 2.09 | 85.64 |
| 39.95 | 7.68 | 1.06 | 0.73 | 0.38 | 2.09 | 85.44 |
| 39.97 | 7.67 | 1.05 | 0.73 | 0.38 | 2.08 | 85.23 |
| 39.98 | 7.68 | 1.05 | 0.73 | 0.38 | 2.08 | 85.02 |
| 40.00 | 7.67 | 1.05 | 0.73 | 0.37 | 2.07 | 84.81 |
| 40.02 | 7.56 | 1.05 | 0.73 | 0.37 | 2.07 | 84.59 |
| 40.03 | 7.53 | 1.05 | 0.73 | 0.37 | 2.07 | 84.37 |
| 40.05 | 7.56 | 1.05 | 0.73 | 0.37 | 2.06 | 84.16 |
| 40.07 | 7.54 | 1.05 | 0.73 | 0.37 | 2.06 | 83.95 |
| 40.08 | 7.50 | 1.05 | 0.72 | 0.36 | 2.06 | 83.73 |
| 40.10 | 7.48 | 1.04 | 0.72 | 0.36 | 2.06 | 83.51 |
| 40.12 | 7.47 | 1.04 | 0.72 | 0.36 | 2.05 | 83.30 |
| 40.13 | 7.47 | 1.04 | 0.72 | 0.36 | 2.04 | 83.08 |
| 40.15 | 7.56 | 1.04 | 0.72 | 0.35 | 2.04 | 82.86 |
| 40.17 | 7.60 | 1.04 | 0.72 | 0.35 | 2.03 | 82.64 |
| 40.18 | 7.70 | 1.04 | 0.72 | 0.35 | 2.03 | 82.43 |
| 40.20 | 7.77 | 1.04 | 0.72 | 0.35 | 2.03 | 82.21 |
| 40.22 | 7.73 | 1.04 | 0.72 | 0.35 | 2.03 | 81.99 |
| 40.23 | 7.65 | 1.03 | 0.72 | 0.34 | 2.02 | 81.77 |
| 40.25 | 7.50 | 1.03 | 0.71 | 0.34 | 2.02 | 81.55 |
| 40.27 | 7.37 | 1.03 | 0.71 | 0.34 | 2.02 | 81.33 |
| 40.28 | 7.36 | 1.02 | 0.71 | 0.33 | 2.01 | 81.12 |
| 40.30 | 7.43 | 1.02 | 0.71 | 0.33 | 2.01 | 80.91 |
| 40.32 | 7.62 | 1.02 | 0.71 | 0.33 | 2.00 | 80.70 |
| 40.33 | 7.68 | 1.02 | 0.71 | 0.33 | 2.00 | 80.47 |
| 40.35 | 7.57 | 1.02 | 0.71 | 0.32 | 1.99 | 80.25 |
| 40.37 | 7.57 | 1.02 | 0.71 | 0.32 | 1.99 | 80.04 |
| 40.38 | 7.59 | 1.02 | 0.70 | 0.32 | 1.99 | 79.83 |
| 40.40 | 7.43 | 1.02 | 0.70 | 0.32 | 1.98 | 79.62 |
| 40.42 | 7.47 | 1.02 | 0.70 | 0.32 | 1.98 | 79.39 |
| 40.43 | 7.59 | 1.02 | 0.70 | 0.32 | 1.98 | 79.18 |
| 40.45 | 7.54 | 1.01 | 0.70 | 0.31 | 1.97 | 78.96 |
| 40.47 | 7.39 | 1.01 | 0.70 | 0.31 | 1.97 | 78.74 |
| 40.48 | 7.30 | 1.01 | 0.70 | 0.31 | 1.96 | 78.51 |
| 40.50 | 7.33 | 1.01 | 0.70 | 0.31 | 1.96 | 78.29 |
| 40.52 | 7.34 | 1.00 | 0.69 | 0.31 | 1.96 | 78.07 |
| 40.53 | 7.45 | 1.00 | 0.70 | 0.31 | 1.95 | 77.86 |
| 40.55 | 7.62 | 1.00 | 0.70 | 0.31 | 1.95 | 77.64 |
| 40.57 | 7.67 | 1.00 | 0.69 | 0.30 | 1.95 | 77.43 |
| 40.58 | 7.53 | 1.00 | 0.69 | 0.30 | 1.94 | 77.21 |
| 40.60 | 7.47 | 1.00 | 0.69 | 0.29 | 1.94 | 76.99 |
| 40.62 | 7.50 | 0.99 | 0.69 | 0.29 | 1.93 | 76.78 |
| 40.63 | 7.50 | 0.99 | 0.69 | 0.29 | 1.93 | 76.57 |
| 40.65 | 7.59 | 0.99 | 0.69 | 0.29 | 1.93 | 76.36 |
| 40.67 | 7.65 | 0.99 | 0.68 | 0.29 | 1.92 | 76.14 |
| 40.68 | 7.62 | 0.99 | 0.68 | 0.28 | 1.92 | 75.92 |
| 40.70 | 7.57 | 0.99 | 0.68 | 0.28 | 1.92 | 75.70 |
| 40.72 | 7.53 | 0.99 | 0.68 | 0.28 | 1.91 | 75.49 |
| 40.73 | 7.45 | 0.99 | 0.68 | 0.28 | 1.91 | 75.28 |
| 40.75 | 7.48 | 0.99 | 0.68 | 0.27 | 1.90 | 75.06 |
| 40.77 | 7.59 | 0.98 | 0.68 | 0.27 | 1.90 | 74.84 |
| 40.78 | 7.68 | 0.99 | 0.68 | 0.26 | 1.90 | 74.62 |
| 40.80 | 7.68 | 0.99 | 0.68 | 0.26 | 1.90 | 74.40 |





|       |      |      |      |      |      |       |
|-------|------|------|------|------|------|-------|
| 40.82 | 7.62 | 0.99 | 0.68 | 0.26 | 1.89 | 74.19 |
| 40.83 | 7.51 | 0.98 | 0.67 | 0.26 | 1.89 | 73.98 |
| 40.85 | 7.50 | 0.98 | 0.67 | 0.26 | 1.89 | 73.76 |
| 40.87 | 7.73 | 0.98 | 0.67 | 0.26 | 1.88 | 73.55 |
| 40.88 | 7.84 | 0.98 | 0.67 | 0.25 | 1.88 | 73.34 |
| 40.90 | 7.68 | 0.98 | 0.67 | 0.25 | 1.88 | 73.13 |
| 40.92 | 7.64 | 0.98 | 0.67 | 0.25 | 1.87 | 72.92 |
| 40.93 | 7.73 | 0.98 | 0.67 | 0.25 | 1.87 | 72.71 |
| 40.95 | 7.74 | 0.97 | 0.67 | 0.25 | 1.86 | 72.49 |
| 40.97 | 7.62 | 0.97 | 0.67 | 0.24 | 1.86 | 72.28 |
| 40.98 | 7.57 | 0.97 | 0.67 | 0.24 | 1.86 | 72.06 |
| 41.00 | 7.59 | 0.97 | 0.67 | 0.24 | 1.85 | 71.85 |
| 41.02 | 7.45 | 0.97 | 0.66 | 0.23 | 1.85 | 71.63 |
| 41.03 | 7.31 | 0.97 | 0.66 | 0.23 | 1.85 | 71.42 |
| 41.05 | 7.42 | 0.97 | 0.66 | 0.23 | 1.85 | 71.20 |
| 41.07 | 7.56 | 0.97 | 0.66 | 0.23 | 1.84 | 70.98 |
| 41.08 | 7.60 | 0.97 | 0.66 | 0.23 | 1.84 | 70.77 |
| 41.10 | 7.54 | 0.96 | 0.66 | 0.23 | 1.84 | 70.57 |
| 41.12 | 7.47 | 0.96 | 0.65 | 0.22 | 1.83 | 70.36 |
| 41.13 | 7.56 | 0.96 | 0.65 | 0.22 | 1.83 | 70.15 |
| 41.15 | 7.60 | 0.96 | 0.65 | 0.22 | 1.83 | 69.95 |
| 41.17 | 7.47 | 0.96 | 0.65 | 0.21 | 1.82 | 69.74 |
| 41.18 | 7.36 | 0.96 | 0.65 | 0.21 | 1.82 | 69.54 |
| 41.20 | 7.36 | 0.96 | 0.65 | 0.21 | 1.82 | 69.33 |
| 41.22 | 7.43 | 0.96 | 0.65 | 0.21 | 1.81 | 69.12 |
| 41.23 | 7.48 | 0.95 | 0.64 | 0.20 | 1.81 | 68.92 |
| 41.25 | 7.47 | 0.95 | 0.64 | 0.20 | 1.81 | 68.71 |
| 41.27 | 7.39 | 0.95 | 0.64 | 0.20 | 1.80 | 68.51 |
| 41.28 | 7.50 | 0.95 | 0.64 | 0.20 | 1.80 | 68.30 |
| 41.30 | 7.64 | 0.95 | 0.64 | 0.20 | 1.80 | 68.10 |
| 41.32 | 7.59 | 0.95 | 0.64 | 0.19 | 1.80 | 67.89 |
| 41.33 | 7.48 | 0.95 | 0.64 | 0.19 | 1.80 | 67.69 |
| 41.35 | 7.53 | 0.95 | 0.64 | 0.19 | 1.79 | 67.50 |
| 41.37 | 7.67 | 0.95 | 0.64 | 0.19 | 1.79 | 67.30 |
| 41.38 | 7.71 | 0.94 | 0.64 | 0.18 | 1.79 | 67.10 |
| 41.40 | 7.67 | 0.94 | 0.64 | 0.18 | 1.78 | 66.89 |
| 41.42 | 7.59 | 0.94 | 0.63 | 0.18 | 1.78 | 66.68 |
| 41.43 | 7.59 | 0.94 | 0.63 | 0.18 | 1.77 | 66.48 |
| 41.45 | 7.60 | 0.94 | 0.63 | 0.17 | 1.77 | 66.27 |
| 41.47 | 7.60 | 0.94 | 0.63 | 0.17 | 1.77 | 66.08 |
| 41.48 | 7.60 | 0.94 | 0.63 | 0.17 | 1.77 | 65.88 |
| 41.50 | 7.60 | 0.94 | 0.63 | 0.17 | 1.77 | 65.68 |
| 41.52 | 7.59 | 0.94 | 0.63 | 0.17 | 1.76 | 65.48 |
| 41.53 | 7.59 | 0.94 | 0.63 | 0.17 | 1.76 | 65.28 |
| 41.55 | 7.76 | 0.93 | 0.63 | 0.16 | 1.76 | 65.08 |
| 41.57 | 7.85 | 0.93 | 0.63 | 0.16 | 1.76 | 64.88 |
| 41.58 | 7.81 | 0.93 | 0.63 | 0.16 | 1.75 | 64.68 |
| 41.60 | 7.65 | 0.93 | 0.63 | 0.16 | 1.75 | 64.49 |
| 41.62 | 7.43 | 0.93 | 0.63 | 0.15 | 1.75 | 64.29 |
| 41.63 | 7.36 | 0.93 | 0.63 | 0.15 | 1.74 | 64.10 |
| 41.65 | 7.42 | 0.92 | 0.62 | 0.15 | 1.74 | 63.91 |
| 41.67 | 7.48 | 0.92 | 0.62 | 0.14 | 1.74 | 63.71 |
| 41.68 | 7.57 | 0.92 | 0.62 | 0.14 | 1.74 | 63.52 |
| 41.70 | 7.56 | 0.92 | 0.62 | 0.14 | 1.73 | 63.32 |
| 41.72 | 7.60 | 0.91 | 0.62 | 0.14 | 1.73 | 63.13 |
| 41.73 | 7.65 | 0.91 | 0.62 | 0.14 | 1.73 | 62.94 |
| 41.75 | 7.54 | 0.91 | 0.62 | 0.14 | 1.73 | 62.75 |
| 41.77 | 7.50 | 0.91 | 0.62 | 0.13 | 1.73 | 62.55 |
| 41.78 | 7.56 | 0.91 | 0.61 | 0.13 | 1.73 | 62.36 |
| 41.80 | 7.59 | 0.91 | 0.61 | 0.13 | 1.72 | 62.18 |
| 41.82 | 7.51 | 0.91 | 0.61 | 0.13 | 1.72 | 62.00 |
| 41.83 | 7.53 | 0.91 | 0.61 | 0.13 | 1.72 | 61.80 |
| 41.85 | 7.73 | 0.91 | 0.61 | 0.13 | 1.71 | 61.62 |
| 41.87 | 7.74 | 0.90 | 0.61 | 0.12 | 1.71 | 61.43 |
| 41.88 | 7.67 | 0.90 | 0.61 | 0.11 | 1.71 | 61.24 |
| 41.90 | 7.59 | 0.90 | 0.61 | 0.11 | 1.71 | 61.05 |
| 41.92 | 7.54 | 0.90 | 0.61 | 0.11 | 1.70 | 60.87 |
| 41.93 | 7.60 | 0.90 | 0.61 | 0.11 | 1.70 | 60.69 |
| 41.95 | 7.65 | 0.90 | 0.61 | 0.11 | 1.70 | 60.51 |



|       |      |      |      |       |      |       |
|-------|------|------|------|-------|------|-------|
| 41.97 | 7.65 | 0.90 | 0.60 | 0.11  | 1.70 | 60.33 |
| 41.98 | 7.71 | 0.90 | 0.60 | 0.11  | 1.70 | 60.15 |
| 42.00 | 7.76 | 0.89 | 0.60 | 0.11  | 1.70 | 59.97 |
| 42.02 | 7.71 | 0.89 | 0.60 | 0.10  | 1.69 | 59.78 |
| 42.03 | 7.51 | 0.89 | 0.60 | 0.10  | 1.69 | 59.60 |
| 42.05 | 7.42 | 0.89 | 0.60 | 0.10  | 1.69 | 59.41 |
| 42.07 | 7.47 | 0.89 | 0.60 | 0.09  | 1.69 | 59.22 |
| 42.08 | 7.47 | 0.89 | 0.60 | 0.09  | 1.69 | 59.04 |
| 42.10 | 7.53 | 0.88 | 0.60 | 0.09  | 1.68 | 58.86 |
| 42.12 | 7.68 | 0.88 | 0.60 | 0.09  | 1.68 | 58.67 |
| 42.13 | 7.71 | 0.88 | 0.60 | 0.08  | 1.67 | 58.49 |
| 42.15 | 7.57 | 0.88 | 0.59 | 0.08  | 1.67 | 58.32 |
| 42.17 | 7.51 | 0.88 | 0.59 | 0.08  | 1.67 | 58.15 |
| 42.18 | 7.54 | 0.87 | 0.59 | 0.08  | 1.67 | 57.97 |
| 42.20 | 7.65 | 0.87 | 0.59 | 0.08  | 1.67 | 57.79 |
| 42.22 | 7.74 | 0.87 | 0.59 | 0.08  | 1.66 | 57.61 |
| 42.23 | 7.77 | 0.87 | 0.59 | 0.08  | 1.66 | 57.44 |
| 42.25 | 7.81 | 0.86 | 0.59 | 0.07  | 1.66 | 57.27 |
| 42.27 | 7.68 | 0.86 | 0.59 | 0.07  | 1.66 | 57.10 |
| 42.28 | 7.48 | 0.86 | 0.59 | 0.07  | 1.66 | 56.92 |
| 42.30 | 7.47 | 0.86 | 0.59 | 0.07  | 1.65 | 56.75 |
| 42.32 | 7.57 | 0.86 | 0.58 | 0.07  | 1.65 | 56.58 |
| 42.33 | 7.71 | 0.86 | 0.58 | 0.06  | 1.65 | 56.41 |
| 42.35 | 7.71 | 0.86 | 0.58 | 0.06  | 1.65 | 56.24 |
| 42.37 | 7.62 | 0.86 | 0.58 | 0.06  | 1.65 | 56.07 |
| 42.38 | 7.60 | 0.86 | 0.58 | 0.06  | 1.65 | 55.89 |
| 42.40 | 7.64 | 0.85 | 0.58 | 0.05  | 1.65 | 55.72 |
| 42.42 | 7.70 | 0.85 | 0.58 | 0.05  | 1.65 | 55.55 |
| 42.43 | 7.79 | 0.85 | 0.58 | 0.05  | 1.64 | 55.38 |
| 42.45 | 7.84 | 0.85 | 0.58 | 0.05  | 1.64 | 55.21 |
| 42.47 | 7.76 | 0.85 | 0.58 | 0.05  | 1.64 | 55.05 |
| 42.48 | 7.62 | 0.85 | 0.58 | 0.05  | 1.64 | 54.88 |
| 42.50 | 7.60 | 0.84 | 0.58 | 0.04  | 1.64 | 54.71 |
| 42.52 | 7.74 | 0.84 | 0.58 | 0.04  | 1.63 | 54.54 |
| 42.53 | 7.84 | 0.84 | 0.57 | 0.04  | 1.63 | 54.37 |
| 42.55 | 7.84 | 0.84 | 0.57 | 0.04  | 1.63 | 54.21 |
| 42.57 | 7.84 | 0.83 | 0.57 | 0.04  | 1.63 | 54.05 |
| 42.58 | 7.79 | 0.83 | 0.57 | 0.04  | 1.63 | 53.89 |
| 42.60 | 7.74 | 0.83 | 0.57 | 0.03  | 1.62 | 53.73 |
| 42.62 | 7.73 | 0.83 | 0.57 | 0.03  | 1.62 | 53.57 |
| 42.63 | 7.81 | 0.83 | 0.57 | 0.02  | 1.62 | 53.41 |
| 42.65 | 7.90 | 0.83 | 0.57 | 0.02  | 1.62 | 53.26 |
| 42.67 | 7.91 | 0.83 | 0.57 | 0.03  | 1.62 | 53.10 |
| 42.68 | 7.88 | 0.83 | 0.57 | 0.03  | 1.62 | 52.94 |
| 42.70 | 7.82 | 0.82 | 0.57 | 0.02  | 1.62 | 52.78 |
| 42.72 | 7.74 | 0.82 | 0.57 | 0.02  | 1.62 | 52.62 |
| 42.73 | 7.74 | 0.82 | 0.56 | 0.01  | 1.61 | 52.46 |
| 42.75 | 7.71 | 0.82 | 0.56 | 0.01  | 1.61 | 52.31 |
| 42.77 | 7.68 | 0.82 | 0.56 | 0.02  | 1.61 | 52.15 |
| 42.78 | 7.71 | 0.82 | 0.56 | 0.01  | 1.61 | 52.00 |
| 42.80 | 7.73 | 0.81 | 0.56 | 0.01  | 1.60 | 51.84 |
| 42.82 | 7.73 | 0.81 | 0.56 | 0.01  | 1.60 | 51.69 |
| 42.83 | 7.77 | 0.81 | 0.56 | 0.01  | 1.60 | 51.53 |
| 42.85 | 7.82 | 0.80 | 0.56 | 0.01  | 1.60 | 51.36 |
| 42.87 | 7.79 | 0.80 | 0.56 | 0.01  | 1.60 | 51.21 |
| 42.88 | 7.76 | 0.80 | 0.56 | 0.00  | 1.60 | 51.06 |
| 42.90 | 7.74 | 0.80 | 0.56 | 0.00  | 1.59 | 50.91 |
| 42.92 | 7.73 | 0.80 | 0.56 | 0.00  | 1.59 | 50.76 |
| 42.93 | 7.81 | 0.80 | 0.56 | 0.00  | 1.59 | 50.61 |
| 42.95 | 7.84 | 0.80 | 0.55 | -0.01 | 1.59 | 50.46 |
| 42.97 | 7.81 | 0.79 | 0.55 | -0.01 | 1.59 | 50.31 |
| 42.98 | 7.74 | 0.79 | 0.55 | -0.01 | 1.59 | 50.16 |
| 43.00 | 7.76 | 0.79 | 0.55 | -0.01 | 1.58 | 50.01 |
| 43.02 | 7.74 | 0.79 | 0.55 | -0.01 | 1.58 | 49.86 |
| 43.03 | 7.74 | 0.79 | 0.55 | -0.01 | 1.58 | 49.73 |
| 43.05 | 7.79 | 0.79 | 0.55 | -0.01 | 1.58 | 49.58 |
| 43.07 | 7.70 | 0.79 | 0.55 | -0.01 | 1.58 | 49.44 |
| 43.08 | 7.60 | 0.79 | 0.55 | -0.02 | 1.58 | 49.29 |
| 43.10 | 7.64 | 0.79 | 0.54 | -0.02 | 1.58 | 49.15 |



|       |      |      |      |       |      |       |
|-------|------|------|------|-------|------|-------|
| 43.12 | 7.68 | 0.79 | 0.54 | -0.02 | 1.58 | 49.00 |
| 43.13 | 7.77 | 0.78 | 0.54 | -0.02 | 1.58 | 48.85 |
| 43.15 | 7.88 | 0.78 | 0.54 | -0.03 | 1.57 | 48.71 |
| 43.17 | 7.94 | 0.78 | 0.54 | -0.03 | 1.57 | 48.57 |
| 43.18 | 7.85 | 0.78 | 0.54 | -0.03 | 1.57 | 48.43 |
| 43.20 | 7.76 | 0.78 | 0.54 | -0.03 | 1.57 | 48.29 |
| 43.22 | 7.82 | 0.77 | 0.54 | -0.03 | 1.57 | 48.14 |
| 43.23 | 7.88 | 0.77 | 0.54 | -0.03 | 1.57 | 48.00 |
| 43.25 | 7.82 | 0.77 | 0.54 | -0.03 | 1.56 | 47.87 |
| 43.27 | 7.71 | 0.77 | 0.54 | -0.04 | 1.56 | 47.74 |
| 43.28 | 7.76 | 0.77 | 0.54 | -0.04 | 1.56 | 47.60 |
| 43.30 | 7.77 | 0.77 | 0.54 | -0.04 | 1.57 | 47.46 |
| 43.32 | 7.65 | 0.77 | 0.54 | -0.04 | 1.56 | 47.33 |
| 43.33 | 7.54 | 0.77 | 0.53 | -0.04 | 1.56 | 47.20 |
| 43.35 | 7.65 | 0.76 | 0.53 | -0.05 | 1.56 | 47.06 |
| 43.37 | 7.84 | 0.76 | 0.53 | -0.05 | 1.56 | 46.92 |
| 43.38 | 7.87 | 0.76 | 0.53 | -0.05 | 1.56 | 46.79 |
| 43.40 | 7.82 | 0.76 | 0.53 | -0.05 | 1.56 | 46.65 |
| 43.42 | 7.79 | 0.76 | 0.53 | -0.05 | 1.55 | 46.51 |
| 43.43 | 7.82 | 0.76 | 0.53 | -0.05 | 1.56 | 46.38 |
| 43.45 | 7.85 | 0.76 | 0.53 | -0.05 | 1.55 | 46.25 |
| 43.47 | 7.85 | 0.76 | 0.53 | -0.06 | 1.55 | 46.11 |
| 43.48 | 7.93 | 0.75 | 0.53 | -0.06 | 1.55 | 45.98 |
| 43.50 | 7.94 | 0.75 | 0.52 | -0.06 | 1.55 | 45.85 |
| 43.52 | 7.90 | 0.75 | 0.52 | -0.06 | 1.55 | 45.73 |
| 43.53 | 7.90 | 0.75 | 0.52 | -0.06 | 1.55 | 45.60 |
| 43.55 | 7.84 | 0.75 | 0.52 | -0.06 | 1.55 | 45.47 |
| 43.57 | 7.74 | 0.75 | 0.52 | -0.07 | 1.55 | 45.35 |
| 43.58 | 7.73 | 0.75 | 0.52 | -0.07 | 1.54 | 45.22 |
| 43.60 | 7.76 | 0.75 | 0.52 | -0.08 | 1.54 | 45.10 |
| 43.62 | 7.73 | 0.75 | 0.52 | -0.08 | 1.54 | 44.97 |
| 43.63 | 7.67 | 0.75 | 0.52 | -0.08 | 1.54 | 44.84 |
| 43.65 | 7.67 | 0.74 | 0.52 | -0.08 | 1.54 | 44.71 |
| 43.67 | 7.67 | 0.74 | 0.52 | -0.08 | 1.54 | 44.59 |
| 43.68 | 7.73 | 0.74 | 0.52 | -0.08 | 1.54 | 44.47 |
| 43.70 | 7.76 | 0.74 | 0.52 | -0.09 | 1.54 | 44.35 |
| 43.72 | 7.79 | 0.74 | 0.52 | -0.08 | 1.54 | 44.22 |
| 43.73 | 7.91 | 0.74 | 0.51 | -0.08 | 1.53 | 44.10 |
| 43.75 | 8.01 | 0.74 | 0.51 | -0.09 | 1.53 | 43.97 |
| 43.77 | 7.98 | 0.74 | 0.51 | -0.08 | 1.53 | 43.85 |
| 43.78 | 7.84 | 0.73 | 0.51 | -0.09 | 1.53 | 43.72 |
| 43.80 | 7.68 | 0.73 | 0.51 | -0.09 | 1.53 | 43.60 |
| 43.82 | 7.62 | 0.73 | 0.51 | -0.09 | 1.53 | 43.48 |
| 43.83 | 7.81 | 0.73 | 0.51 | -0.09 | 1.53 | 43.36 |
| 43.85 | 7.99 | 0.73 | 0.51 | -0.09 | 1.53 | 43.24 |
| 43.87 | 7.99 | 0.73 | 0.51 | -0.09 | 1.53 | 43.13 |
| 43.88 | 7.81 | 0.72 | 0.51 | -0.10 | 1.53 | 43.01 |
| 43.90 | 7.59 | 0.72 | 0.50 | -0.10 | 1.53 | 42.89 |
| 43.92 | 7.70 | 0.73 | 0.50 | -0.10 | 1.53 | 42.78 |
| 43.93 | 7.91 | 0.73 | 0.50 | -0.10 | 1.52 | 42.66 |
| 43.95 | 7.91 | 0.72 | 0.50 | -0.10 | 1.52 | 42.54 |
| 43.97 | 7.84 | 0.72 | 0.50 | -0.10 | 1.52 | 42.43 |
| 43.98 | 7.88 | 0.72 | 0.50 | -0.10 | 1.52 | 42.31 |
| 44.00 | 7.91 | 0.72 | 0.50 | -0.11 | 1.52 | 42.20 |
| 44.02 | 7.93 | 0.72 | 0.50 | -0.11 | 1.52 | 42.09 |
| 44.03 | 7.84 | 0.72 | 0.50 | -0.11 | 1.52 | 41.98 |
| 44.05 | 7.70 | 0.72 | 0.49 | -0.11 | 1.52 | 41.87 |
| 44.07 | 7.76 | 0.71 | 0.49 | -0.12 | 1.52 | 41.75 |
| 44.08 | 7.85 | 0.71 | 0.49 | -0.12 | 1.52 | 41.64 |
| 44.10 | 7.84 | 0.71 | 0.49 | -0.12 | 1.52 | 41.52 |
| 44.12 | 7.82 | 0.71 | 0.49 | -0.12 | 1.51 | 41.40 |
| 44.13 | 7.84 | 0.71 | 0.49 | -0.12 | 1.51 | 41.30 |
| 44.15 | 7.84 | 0.71 | 0.49 | -0.13 | 1.51 | 41.19 |
| 44.17 | 7.87 | 0.71 | 0.49 | -0.13 | 1.51 | 41.09 |
| 44.18 | 7.90 | 0.71 | 0.49 | -0.13 | 1.51 | 40.98 |
| 44.20 | 7.96 | 0.71 | 0.49 | -0.13 | 1.51 | 40.87 |
| 44.22 | 7.99 | 0.71 | 0.49 | -0.13 | 1.51 | 40.76 |
| 44.23 | 8.01 | 0.70 | 0.49 | -0.13 | 1.51 | 40.66 |
| 44.25 | 8.04 | 0.70 | 0.49 | -0.13 | 1.51 | 40.54 |



|       |      |      |      |       |      |       |
|-------|------|------|------|-------|------|-------|
| 44.27 | 7.99 | 0.70 | 0.48 | -0.13 | 1.51 | 40.43 |
| 44.28 | 8.01 | 0.70 | 0.48 | -0.13 | 1.51 | 40.33 |
| 44.30 | 8.04 | 0.70 | 0.48 | -0.14 | 1.51 | 40.23 |
| 44.32 | 7.98 | 0.70 | 0.48 | -0.14 | 1.51 | 40.12 |
| 44.33 | 7.93 | 0.70 | 0.48 | -0.14 | 1.51 | 40.00 |
| 44.35 | 7.93 | 0.70 | 0.48 | -0.14 | 1.51 | 39.89 |
| 44.37 | 7.93 | 0.70 | 0.48 | -0.14 | 1.51 | 39.79 |
| 44.38 | 7.98 | 0.69 | 0.48 | -0.14 | 1.50 | 39.69 |
| 44.40 | 7.91 | 0.69 | 0.48 | -0.14 | 1.50 | 39.59 |
| 44.42 | 7.81 | 0.69 | 0.48 | -0.15 | 1.50 | 39.48 |
| 44.43 | 7.73 | 0.69 | 0.48 | -0.15 | 1.50 | 39.38 |
| 44.45 | 7.77 | 0.69 | 0.48 | -0.15 | 1.50 | 39.28 |
| 44.47 | 7.93 | 0.69 | 0.48 | -0.15 | 1.50 | 39.18 |
| 44.48 | 7.99 | 0.68 | 0.47 | -0.15 | 1.50 | 39.08 |
| 44.50 | 7.81 | 0.68 | 0.47 | -0.15 | 1.50 | 38.98 |
| 44.52 | 7.76 | 0.68 | 0.47 | -0.16 | 1.50 | 38.87 |
| 44.53 | 7.88 | 0.68 | 0.47 | -0.16 | 1.50 | 38.78 |
| 44.55 | 7.88 | 0.68 | 0.47 | -0.16 | 1.49 | 38.69 |
| 44.57 | 7.90 | 0.68 | 0.47 | -0.16 | 1.49 | 38.59 |
| 44.58 | 8.01 | 0.68 | 0.47 | -0.16 | 1.49 | 38.50 |
| 44.60 | 7.99 | 0.68 | 0.47 | -0.16 | 1.49 | 38.40 |
| 44.62 | 7.90 | 0.68 | 0.47 | -0.16 | 1.50 | 38.30 |
| 44.63 | 7.91 | 0.68 | 0.47 | -0.17 | 1.49 | 38.20 |
| 44.65 | 8.02 | 0.68 | 0.47 | -0.17 | 1.49 | 38.10 |
| 44.67 | 7.88 | 0.67 | 0.47 | -0.17 | 1.49 | 37.99 |
| 44.68 | 7.73 | 0.67 | 0.46 | -0.17 | 1.49 | 37.90 |
| 44.70 | 7.87 | 0.67 | 0.46 | -0.17 | 1.49 | 37.80 |
| 44.72 | 7.91 | 0.68 | 0.46 | -0.17 | 1.49 | 37.71 |
| 44.73 | 7.93 | 0.68 | 0.47 | -0.18 | 1.49 | 37.61 |
| 44.75 | 8.01 | 0.68 | 0.46 | -0.18 | 1.49 | 37.52 |
| 44.77 | 7.94 | 0.67 | 0.46 | -0.18 | 1.49 | 37.43 |
| 44.78 | 7.84 | 0.67 | 0.46 | -0.18 | 1.49 | 37.34 |
| 44.80 | 7.91 | 0.67 | 0.46 | -0.18 | 1.48 | 37.25 |
| 44.82 | 8.01 | 0.67 | 0.46 | -0.18 | 1.48 | 37.15 |
| 44.83 | 7.96 | 0.67 | 0.46 | -0.18 | 1.48 | 37.07 |
| 44.85 | 7.99 | 0.67 | 0.46 | -0.18 | 1.48 | 36.98 |
| 44.87 | 8.01 | 0.67 | 0.46 | -0.18 | 1.48 | 36.88 |
| 44.88 | 7.90 | 0.66 | 0.46 | -0.18 | 1.48 | 36.78 |
| 44.90 | 7.85 | 0.66 | 0.46 | -0.18 | 1.48 | 36.69 |
| 44.92 | 7.91 | 0.66 | 0.46 | -0.18 | 1.48 | 36.60 |
| 44.93 | 7.93 | 0.66 | 0.46 | -0.18 | 1.48 | 36.50 |
| 44.95 | 7.94 | 0.66 | 0.46 | -0.19 | 1.48 | 36.41 |
| 44.97 | 7.94 | 0.66 | 0.46 | -0.19 | 1.48 | 36.33 |
| 44.98 | 7.87 | 0.66 | 0.46 | -0.19 | 1.48 | 36.24 |
| 45.00 | 7.81 | 0.66 | 0.46 | -0.19 | 1.48 | 36.14 |
| 45.02 | 7.88 | 0.66 | 0.46 | -0.19 | 1.48 | 36.06 |
| 45.03 | 7.99 | 0.65 | 0.46 | -0.20 | 1.48 | 35.97 |
| 45.05 | 8.02 | 0.65 | 0.46 | -0.20 | 1.48 | 35.89 |
| 45.07 | 7.96 | 0.65 | 0.46 | -0.20 | 1.48 | 35.80 |
| 45.08 | 7.87 | 0.65 | 0.46 | -0.20 | 1.48 | 35.71 |
| 45.10 | 7.94 | 0.65 | 0.46 | -0.20 | 1.47 | 35.62 |
| 45.12 | 8.11 | 0.65 | 0.46 | -0.20 | 1.48 | 35.53 |
| 45.13 | 8.19 | 0.65 | 0.46 | -0.21 | 1.48 | 35.44 |
| 45.15 | 8.15 | 0.65 | 0.46 | -0.21 | 1.48 | 35.36 |
| 45.17 | 8.10 | 0.65 | 0.46 | -0.21 | 1.48 | 35.27 |
| 45.18 | 8.05 | 0.65 | 0.46 | -0.21 | 1.47 | 35.18 |
| 45.20 | 8.04 | 0.65 | 0.46 | -0.21 | 1.47 | 35.10 |
| 45.22 | 8.02 | 0.65 | 0.46 | -0.21 | 1.47 | 35.02 |
| 45.23 | 8.04 | 0.64 | 0.46 | -0.21 | 1.47 | 34.94 |
| 45.25 | 8.11 | 0.64 | 0.46 | -0.22 | 1.47 | 34.86 |
| 45.27 | 8.08 | 0.64 | 0.46 | -0.22 | 1.47 | 34.77 |
| 45.28 | 8.01 | 0.64 | 0.46 | -0.22 | 1.47 | 34.68 |
| 45.30 | 8.05 | 0.64 | 0.46 | -0.22 | 1.47 | 34.60 |
| 45.32 | 8.16 | 0.64 | 0.46 | -0.22 | 1.47 | 34.52 |
| 45.33 | 8.11 | 0.63 | 0.45 | -0.22 | 1.47 | 34.44 |
| 45.35 | 8.04 | 0.63 | 0.46 | -0.22 | 1.47 | 34.36 |
| 45.37 | 8.07 | 0.63 | 0.46 | -0.22 | 1.46 | 34.27 |
| 45.38 | 8.18 | 0.63 | 0.46 | -0.22 | 1.47 | 34.19 |
| 45.40 | 8.22 | 0.63 | 0.46 | -0.22 | 1.47 | 34.11 |



|       |      |      |      |       |      |       |
|-------|------|------|------|-------|------|-------|
| 45.42 | 8.21 | 0.63 | 0.46 | -0.23 | 1.47 | 34.03 |
| 45.43 | 8.16 | 0.63 | 0.46 | -0.23 | 1.46 | 33.96 |
| 45.45 | 8.18 | 0.63 | 0.46 | -0.24 | 1.46 | 33.88 |
| 45.47 | 8.16 | 0.63 | 0.46 | -0.24 | 1.46 | 33.80 |
| 45.48 | 8.13 | 0.63 | 0.46 | -0.24 | 1.46 | 33.72 |
| 45.50 | 8.15 | 0.63 | 0.46 | -0.24 | 1.46 | 33.64 |
| 45.52 | 8.13 | 0.62 | 0.46 | -0.24 | 1.46 | 33.55 |
| 45.53 | 8.15 | 0.62 | 0.46 | -0.24 | 1.46 | 33.47 |
| 45.55 | 8.18 | 0.62 | 0.46 | -0.24 | 1.46 | 33.39 |
| 45.57 | 8.19 | 0.62 | 0.46 | -0.24 | 1.46 | 33.32 |
| 45.58 | 8.16 | 0.62 | 0.46 | -0.24 | 1.46 | 33.23 |
| 45.60 | 8.07 | 0.62 | 0.46 | -0.24 | 1.46 | 33.16 |
| 45.62 | 8.07 | 0.62 | 0.46 | -0.24 | 1.46 | 33.09 |
| 45.63 | 8.07 | 0.62 | 0.46 | -0.24 | 1.46 | 33.01 |
| 45.65 | 7.98 | 0.62 | 0.47 | -0.24 | 1.46 | 32.93 |
| 45.67 | 7.98 | 0.61 | 0.47 | -0.25 | 1.46 | 32.86 |
| 45.68 | 8.11 | 0.61 | 0.47 | -0.25 | 1.45 | 32.77 |
| 45.70 | 8.22 | 0.61 | 0.47 | -0.25 | 1.45 | 32.70 |
| 45.72 | 8.19 | 0.61 | 0.47 | -0.25 | 1.45 | 32.62 |
| 45.73 | 8.13 | 0.61 | 0.47 | -0.25 | 1.45 | 32.55 |
| 45.75 | 8.18 | 0.61 | 0.47 | -0.25 | 1.45 | 32.48 |
| 45.77 | 8.19 | 0.61 | 0.47 | -0.25 | 1.45 | 32.41 |
| 45.78 | 8.13 | 0.61 | 0.47 | -0.26 | 1.45 | 32.34 |
| 45.80 | 8.19 | 0.61 | 0.47 | -0.26 | 1.45 | 32.27 |
| 45.82 | 8.25 | 0.61 | 0.48 | -0.26 | 1.45 | 32.19 |
| 45.83 | 8.19 | 0.61 | 0.48 | -0.26 | 1.45 | 32.11 |
| 45.85 | 8.11 | 0.61 | 0.48 | -0.26 | 1.45 | 32.03 |
| 45.87 | 8.10 | 0.60 | 0.48 | -0.26 | 1.45 | 31.96 |
| 45.88 | 8.07 | 0.60 | 0.48 | -0.26 | 1.45 | 31.89 |
| 45.90 | 8.04 | 0.60 | 0.48 | -0.27 | 1.45 | 31.81 |
| 45.92 | 8.05 | 0.61 | 0.48 | -0.27 | 1.45 | 31.74 |
| 45.93 | 8.15 | 0.60 | 0.48 | -0.27 | 1.44 | 31.67 |
| 45.95 | 8.35 | 0.60 | 0.49 | -0.27 | 1.44 | 31.61 |
| 45.97 | 8.38 | 0.60 | 0.49 | -0.27 | 1.44 | 31.54 |
| 45.98 | 8.21 | 0.60 | 0.49 | -0.27 | 1.44 | 31.47 |
| 46.00 | 8.13 | 0.60 | 0.49 | -0.27 | 1.44 | 31.40 |
| 46.02 | 8.19 | 0.60 | 0.49 | -0.27 | 1.44 | 31.33 |
| 46.03 | 8.15 | 0.60 | 0.49 | -0.27 | 1.44 | 31.27 |
| 46.05 | 7.94 | 0.60 | 0.49 | -0.27 | 1.44 | 31.20 |
| 46.07 | 7.85 | 0.59 | 0.49 | -0.27 | 1.44 | 31.13 |
| 46.08 | 7.90 | 0.59 | 0.49 | -0.27 | 1.44 | 31.07 |
| 46.10 | 8.07 | 0.59 | 0.49 | -0.28 | 1.44 | 31.00 |
| 46.12 | 8.22 | 0.59 | 0.50 | -0.28 | 1.44 | 30.92 |
| 46.13 | 8.15 | 0.59 | 0.50 | -0.28 | 1.44 | 30.84 |
| 46.15 | 7.99 | 0.59 | 0.50 | -0.28 | 1.43 | 30.77 |
| 46.17 | 7.93 | 0.59 | 0.50 | -0.28 | 1.43 | 30.71 |
| 46.18 | 7.88 | 0.58 | 0.51 | -0.28 | 1.43 | 30.64 |
| 46.20 | 8.02 | 0.59 | 0.51 | -0.28 | 1.43 | 30.58 |
| 46.22 | 8.16 | 0.59 | 0.51 | -0.28 | 1.43 | 30.51 |
| 46.23 | 8.13 | 0.59 | 0.51 | -0.29 | 1.43 | 30.44 |
| 46.25 | 8.08 | 0.59 | 0.51 | -0.29 | 1.43 | 30.38 |
| 46.27 | 8.07 | 0.58 | 0.52 | -0.29 | 1.43 | 30.32 |
| 46.28 | 8.01 | 0.58 | 0.52 | -0.29 | 1.43 | 30.25 |
| 46.30 | 8.04 | 0.58 | 0.52 | -0.29 | 1.43 | 30.19 |
| 46.32 | 8.13 | 0.58 | 0.52 | -0.29 | 1.43 | 30.12 |
| 46.33 | 8.18 | 0.58 | 0.52 | -0.29 | 1.43 | 30.05 |
| 46.35 | 8.15 | 0.58 | 0.52 | -0.29 | 1.43 | 29.98 |
| 46.37 | 8.13 | 0.58 | 0.53 | -0.29 | 1.43 | 29.92 |
| 46.38 | 8.32 | 0.58 | 0.53 | -0.29 | 1.43 | 29.86 |
| 46.40 | 8.32 | 0.58 | 0.53 | -0.30 | 1.43 | 29.79 |
| 46.42 | 8.16 | 0.58 | 0.53 | -0.30 | 1.42 | 29.72 |
| 46.43 | 8.11 | 0.58 | 0.54 | -0.30 | 1.42 | 29.67 |
| 46.45 | 8.07 | 0.58 | 0.54 | -0.30 | 1.42 | 29.61 |
| 46.47 | 8.13 | 0.57 | 0.54 | -0.30 | 1.42 | 29.54 |
| 46.48 | 8.25 | 0.57 | 0.54 | -0.30 | 1.42 | 29.47 |
| 46.50 | 8.27 | 0.57 | 0.54 | -0.31 | 1.42 | 29.41 |
| 46.52 | 8.15 | 0.57 | 0.54 | -0.31 | 1.42 | 29.35 |
| 46.53 | 8.07 | 0.57 | 0.55 | -0.31 | 1.42 | 29.28 |
| 46.55 | 8.07 | 0.57 | 0.55 | -0.31 | 1.42 | 29.22 |



|       |      |      |      |       |      |       |
|-------|------|------|------|-------|------|-------|
| 46.57 | 8.08 | 0.57 | 0.55 | -0.31 | 1.42 | 29.16 |
| 46.58 | 8.10 | 0.56 | 0.55 | -0.31 | 1.42 | 29.10 |
| 46.60 | 8.10 | 0.56 | 0.55 | -0.31 | 1.42 | 29.03 |
| 46.62 | 8.19 | 0.56 | 0.56 | -0.31 | 1.41 | 28.97 |
| 46.63 | 8.13 | 0.56 | 0.56 | -0.31 | 1.41 | 28.91 |
| 46.65 | 8.02 | 0.56 | 0.56 | -0.31 | 1.41 | 28.84 |
| 46.67 | 8.01 | 0.56 | 0.56 | -0.32 | 1.41 | 28.79 |
| 46.68 | 7.99 | 0.56 | 0.57 | -0.32 | 1.41 | 28.72 |
| 46.70 | 7.87 | 0.56 | 0.57 | -0.32 | 1.41 | 28.66 |
| 46.72 | 7.87 | 0.56 | 0.57 | -0.32 | 1.41 | 28.59 |
| 46.73 | 7.93 | 0.56 | 0.57 | -0.32 | 1.41 | 28.54 |
| 46.75 | 7.94 | 0.56 | 0.57 | -0.32 | 1.41 | 28.48 |
| 46.77 | 7.94 | 0.56 | 0.58 | -0.32 | 1.41 | 28.42 |
| 46.78 | 8.10 | 0.56 | 0.58 | -0.32 | 1.41 | 28.37 |
| 46.80 | 8.21 | 0.56 | 0.58 | -0.32 | 1.41 | 28.31 |
| 46.82 | 8.13 | 0.56 | 0.58 | -0.32 | 1.40 | 28.24 |
| 46.83 | 8.11 | 0.56 | 0.58 | -0.32 | 1.40 | 28.18 |
| 46.85 | 8.18 | 0.56 | 0.59 | -0.33 | 1.40 | 28.12 |
| 46.87 | 8.13 | 0.55 | 0.59 | -0.33 | 1.40 | 28.07 |
| 46.88 | 8.01 | 0.55 | 0.59 | -0.33 | 1.40 | 28.02 |
| 46.90 | 8.02 | 0.55 | 0.59 | -0.33 | 1.40 | 27.96 |
| 46.92 | 8.08 | 0.55 | 0.59 | -0.33 | 1.40 | 27.91 |
| 46.93 | 8.02 | 0.54 | 0.59 | -0.33 | 1.40 | 27.85 |
| 46.95 | 7.90 | 0.54 | 0.60 | -0.33 | 1.39 | 27.79 |
| 46.97 | 7.90 | 0.54 | 0.60 | -0.33 | 1.39 | 27.73 |
| 46.98 | 7.91 | 0.54 | 0.60 | -0.33 | 1.39 | 27.67 |
| 47.00 | 7.87 | 0.54 | 0.60 | -0.33 | 1.39 | 27.61 |
| 47.02 | 7.88 | 0.54 | 0.60 | -0.34 | 1.39 | 27.56 |
| 47.03 | 8.01 | 0.54 | 0.61 | -0.34 | 1.39 | 27.51 |
| 47.05 | 8.04 | 0.54 | 0.61 | -0.34 | 1.39 | 27.45 |
| 47.07 | 7.84 | 0.54 | 0.61 | -0.34 | 1.39 | 27.39 |
| 47.08 | 7.71 | 0.54 | 0.61 | -0.34 | 1.39 | 27.33 |
| 47.10 | 7.79 | 0.54 | 0.62 | -0.34 | 1.39 | 27.28 |
| 47.12 | 7.87 | 0.54 | 0.62 | -0.34 | 1.39 | 27.22 |
| 47.13 | 7.84 | 0.53 | 0.62 | -0.34 | 1.39 | 27.17 |
| 47.15 | 7.82 | 0.53 | 0.62 | -0.34 | 1.39 | 27.11 |
| 47.17 | 7.87 | 0.54 | 0.62 | -0.34 | 1.39 | 27.06 |
| 47.18 | 7.93 | 0.54 | 0.62 | -0.34 | 1.39 | 27.01 |
| 47.20 | 7.99 | 0.54 | 0.62 | -0.34 | 1.38 | 26.95 |
| 47.22 | 8.02 | 0.54 | 0.62 | -0.35 | 1.38 | 26.90 |
| 47.23 | 8.01 | 0.54 | 0.62 | -0.35 | 1.38 | 26.84 |
| 47.25 | 7.91 | 0.53 | 0.63 | -0.35 | 1.38 | 26.79 |
| 47.27 | 7.94 | 0.53 | 0.63 | -0.35 | 1.38 | 26.73 |
| 47.28 | 8.10 | 0.53 | 0.63 | -0.35 | 1.38 | 26.68 |
| 47.30 | 8.15 | 0.53 | 0.63 | -0.35 | 1.38 | 26.63 |
| 47.32 | 7.96 | 0.53 | 0.63 | -0.35 | 1.38 | 26.57 |
| 47.33 | 7.84 | 0.53 | 0.63 | -0.35 | 1.38 | 26.52 |
| 47.35 | 7.99 | 0.53 | 0.63 | -0.35 | 1.37 | 26.47 |
| 47.37 | 8.22 | 0.53 | 0.63 | -0.35 | 1.37 | 26.41 |
| 47.38 | 8.21 | 0.53 | 0.64 | -0.35 | 1.37 | 26.36 |
| 47.40 | 8.10 | 0.53 | 0.64 | -0.35 | 1.37 | 26.32 |
| 47.42 | 8.08 | 0.52 | 0.64 | -0.36 | 1.37 | 26.26 |
| 47.43 | 7.99 | 0.52 | 0.64 | -0.36 | 1.37 | 26.21 |
| 47.45 | 7.94 | 0.52 | 0.64 | -0.36 | 1.37 | 26.15 |
| 47.47 | 8.02 | 0.52 | 0.64 | -0.36 | 1.37 | 26.10 |
| 47.48 | 7.98 | 0.52 | 0.64 | -0.36 | 1.37 | 26.04 |
| 47.50 | 7.93 | 0.52 | 0.64 | -0.36 | 1.37 | 25.99 |
| 47.52 | 7.98 | 0.52 | 0.65 | -0.36 | 1.37 | 25.94 |
| 47.53 | 8.02 | 0.52 | 0.65 | -0.36 | 1.37 | 25.89 |
| 47.55 | 8.02 | 0.52 | 0.65 | -0.36 | 1.37 | 25.84 |
| 47.57 | 7.91 | 0.52 | 0.65 | -0.36 | 1.37 | 25.79 |
| 47.58 | 7.88 | 0.52 | 0.65 | -0.36 | 1.37 | 25.74 |
| 47.60 | 7.99 | 0.52 | 0.65 | -0.36 | 1.37 | 25.69 |
| 47.62 | 8.07 | 0.52 | 0.65 | -0.37 | 1.36 | 25.64 |
| 47.63 | 7.99 | 0.52 | 0.65 | -0.37 | 1.37 | 25.59 |
| 47.65 | 7.88 | 0.51 | 0.65 | -0.37 | 1.37 | 25.53 |
| 47.67 | 7.99 | 0.51 | 0.65 | -0.37 | 1.37 | 25.48 |
| 47.68 | 8.10 | 0.51 | 0.65 | -0.37 | 1.36 | 25.43 |
| 47.70 | 8.07 | 0.51 | 0.65 | -0.38 | 1.36 | 25.38 |



|       |      |      |      |       |      |       |
|-------|------|------|------|-------|------|-------|
| 47.72 | 8.05 | 0.51 | 0.65 | -0.37 | 1.36 | 25.33 |
| 47.73 | 8.02 | 0.51 | 0.65 | -0.37 | 1.36 | 25.29 |
| 47.75 | 7.96 | 0.51 | 0.65 | -0.37 | 1.36 | 25.25 |
| 47.77 | 7.94 | 0.51 | 0.65 | -0.37 | 1.36 | 25.19 |
| 47.78 | 7.99 | 0.50 | 0.65 | -0.38 | 1.36 | 25.14 |
| 47.80 | 8.08 | 0.50 | 0.65 | -0.38 | 1.36 | 25.09 |
| 47.82 | 8.08 | 0.50 | 0.65 | -0.38 | 1.36 | 25.05 |
| 47.83 | 8.01 | 0.50 | 0.65 | -0.38 | 1.36 | 25.00 |
| 47.85 | 7.99 | 0.50 | 0.65 | -0.38 | 1.36 | 24.95 |
| 47.87 | 7.98 | 0.50 | 0.65 | -0.38 | 1.36 | 24.91 |
| 47.88 | 7.84 | 0.50 | 0.65 | -0.38 | 1.36 | 24.85 |
| 47.90 | 7.76 | 0.50 | 0.65 | -0.38 | 1.36 | 24.81 |
| 47.92 | 7.90 | 0.50 | 0.65 | -0.38 | 1.36 | 24.76 |
| 47.93 | 8.04 | 0.50 | 0.65 | -0.38 | 1.36 | 24.71 |
| 47.95 | 8.07 | 0.50 | 0.65 | -0.38 | 1.36 | 24.65 |
| 47.97 | 7.94 | 0.50 | 0.65 | -0.38 | 1.36 | 24.61 |
| 47.98 | 7.81 | 0.50 | 0.65 | -0.38 | 1.36 | 24.57 |
| 48.00 | 7.88 | 0.50 | 0.65 | -0.38 | 1.36 | 24.53 |
| 48.02 | 7.99 | 0.50 | 0.65 | -0.38 | 1.36 | 24.49 |
| 48.03 | 8.04 | 0.49 | 0.65 | -0.39 | 1.36 | 24.44 |
| 48.05 | 8.05 | 0.49 | 0.65 | -0.39 | 1.36 | 24.39 |
| 48.07 | 7.96 | 0.49 | 0.65 | -0.39 | 1.36 | 24.35 |
| 48.08 | 7.96 | 0.49 | 0.65 | -0.39 | 1.36 | 24.29 |
| 48.10 | 8.10 | 0.49 | 0.65 | -0.39 | 1.36 | 24.24 |
| 48.12 | 8.08 | 0.49 | 0.65 | -0.39 | 1.36 | 24.20 |
| 48.13 | 7.91 | 0.49 | 0.64 | -0.40 | 1.36 | 24.16 |
| 48.15 | 7.79 | 0.49 | 0.64 | -0.39 | 1.36 | 24.12 |
| 48.17 | 7.77 | 0.48 | 0.64 | -0.39 | 1.36 | 24.07 |
| 48.18 | 7.87 | 0.49 | 0.65 | -0.40 | 1.36 | 24.03 |
| 48.20 | 7.94 | 0.49 | 0.65 | -0.40 | 1.36 | 23.98 |
| 48.22 | 7.94 | 0.48 | 0.64 | -0.40 | 1.37 | 23.94 |
| 48.23 | 7.93 | 0.48 | 0.64 | -0.39 | 1.37 | 23.89 |
| 48.25 | 7.94 | 0.48 | 0.64 | -0.40 | 1.37 | 23.84 |
| 48.27 | 7.91 | 0.49 | 0.64 | -0.40 | 1.36 | 23.80 |
| 48.28 | 7.87 | 0.48 | 0.64 | -0.40 | 1.36 | 23.76 |
| 48.30 | 7.84 | 0.48 | 0.64 | -0.41 | 1.36 | 23.72 |
| 48.32 | 7.76 | 0.48 | 0.64 | -0.41 | 1.37 | 23.67 |
| 48.33 | 7.73 | 0.48 | 0.64 | -0.41 | 1.37 | 23.63 |
| 48.35 | 7.88 | 0.48 | 0.64 | -0.41 | 1.37 | 23.59 |
| 48.37 | 8.05 | 0.48 | 0.63 | -0.41 | 1.37 | 23.55 |
| 48.38 | 8.01 | 0.47 | 0.63 | -0.41 | 1.36 | 23.50 |
| 48.40 | 7.93 | 0.47 | 0.63 | -0.41 | 1.36 | 23.45 |
| 48.42 | 8.02 | 0.48 | 0.63 | -0.41 | 1.36 | 23.40 |
| 48.43 | 8.05 | 0.48 | 0.63 | -0.41 | 1.36 | 23.36 |
| 48.45 | 8.02 | 0.48 | 0.63 | -0.41 | 1.36 | 23.32 |
| 48.47 | 8.02 | 0.47 | 0.63 | -0.41 | 1.36 | 23.28 |
| 48.48 | 7.94 | 0.47 | 0.63 | -0.41 | 1.36 | 23.24 |
| 48.50 | 7.76 | 0.47 | 0.62 | -0.41 | 1.36 | 23.20 |
| 48.52 | 7.68 | 0.47 | 0.62 | -0.41 | 1.36 | 23.16 |
| 48.53 | 7.84 | 0.47 | 0.62 | -0.42 | 1.36 | 23.11 |
| 48.55 | 7.93 | 0.47 | 0.62 | -0.42 | 1.36 | 23.07 |
| 48.57 | 7.94 | 0.47 | 0.62 | -0.42 | 1.36 | 23.03 |
| 48.58 | 7.91 | 0.47 | 0.61 | -0.42 | 1.36 | 22.99 |
| 48.60 | 7.90 | 0.47 | 0.61 | -0.42 | 1.36 | 22.94 |
| 48.62 | 7.90 | 0.47 | 0.61 | -0.42 | 1.36 | 22.89 |
| 48.63 | 7.90 | 0.47 | 0.61 | -0.42 | 1.36 | 22.85 |
| 48.65 | 7.88 | 0.46 | 0.61 | -0.42 | 1.36 | 22.82 |
| 48.67 | 7.82 | 0.46 | 0.61 | -0.42 | 1.36 | 22.78 |
| 48.68 | 7.81 | 0.46 | 0.61 | -0.42 | 1.36 | 22.73 |
| 48.70 | 7.93 | 0.46 | 0.61 | -0.42 | 1.36 | 22.69 |
| 48.72 | 8.01 | 0.46 | 0.60 | -0.42 | 1.36 | 22.65 |
| 48.73 | 8.02 | 0.46 | 0.60 | -0.42 | 1.36 | 22.60 |
| 48.75 | 7.93 | 0.46 | 0.60 | -0.43 | 1.36 | 22.55 |
| 48.77 | 7.65 | 0.46 | 0.60 | -0.43 | 1.36 | 22.52 |
| 48.78 | 7.53 | 0.46 | 0.60 | -0.43 | 1.36 | 22.49 |
| 48.80 | 7.65 | 0.46 | 0.59 | -0.43 | 1.36 | 22.45 |
| 48.82 | 7.88 | 0.46 | 0.59 | -0.43 | 1.36 | 22.41 |
| 48.83 | 7.98 | 0.46 | 0.59 | -0.43 | 1.36 | 22.37 |
| 48.85 | 7.93 | 0.46 | 0.59 | -0.43 | 1.36 | 22.33 |



|       |      |      |      |       |      |       |
|-------|------|------|------|-------|------|-------|
| 48.87 | 7.85 | 0.46 | 0.59 | -0.43 | 1.36 | 22.28 |
| 48.88 | 7.74 | 0.46 | 0.58 | -0.43 | 1.36 | 22.23 |
| 48.90 | 7.81 | 0.45 | 0.58 | -0.43 | 1.36 | 22.19 |
| 48.92 | 7.84 | 0.45 | 0.58 | -0.44 | 1.36 | 22.16 |
| 48.93 | 7.90 | 0.46 | 0.58 | -0.44 | 1.36 | 22.12 |
| 48.95 | 7.98 | 0.45 | 0.58 | -0.44 | 1.36 | 22.08 |
| 48.97 | 7.87 | 0.45 | 0.58 | -0.44 | 1.36 | 22.04 |
| 48.98 | 7.77 | 0.45 | 0.57 | -0.44 | 1.36 | 22.00 |
| 49.00 | 7.81 | 0.45 | 0.57 | -0.45 | 1.36 | 21.96 |
| 49.02 | 7.82 | 0.45 | 0.57 | -0.45 | 1.36 | 21.92 |
| 49.03 | 7.88 | 0.45 | 0.57 | -0.45 | 1.36 | 21.88 |
| 49.05 | 7.96 | 0.45 | 0.56 | -0.45 | 1.36 | 21.83 |
| 49.07 | 7.98 | 0.45 | 0.56 | -0.45 | 1.36 | 21.80 |
| 49.08 | 7.88 | 0.44 | 0.56 | -0.45 | 1.36 | 21.77 |
| 49.10 | 7.81 | 0.44 | 0.56 | -0.45 | 1.36 | 21.73 |
| 49.12 | 7.77 | 0.44 | 0.55 | -0.45 | 1.36 | 21.69 |
| 49.13 | 7.84 | 0.44 | 0.55 | -0.45 | 1.36 | 21.66 |
| 49.15 | 7.88 | 0.44 | 0.55 | -0.45 | 1.36 | 21.63 |
| 49.17 | 7.84 | 0.44 | 0.55 | -0.45 | 1.36 | 21.58 |
| 49.18 | 7.84 | 0.44 | 0.54 | -0.45 | 1.36 | 21.54 |
| 49.20 | 7.90 | 0.43 | 0.54 | -0.46 | 1.36 | 21.50 |
| 49.22 | 7.98 | 0.43 | 0.54 | -0.46 | 1.36 | 21.47 |
| 49.23 | 7.90 | 0.43 | 0.54 | -0.46 | 1.36 | 21.43 |
| 49.25 | 7.79 | 0.43 | 0.54 | -0.46 | 1.36 | 21.39 |
| 49.27 | 7.88 | 0.43 | 0.53 | -0.46 | 1.36 | 21.34 |
| 49.28 | 8.02 | 0.43 | 0.53 | -0.46 | 1.36 | 21.31 |
| 49.30 | 8.02 | 0.43 | 0.53 | -0.46 | 1.36 | 21.28 |
| 49.32 | 8.04 | 0.43 | 0.52 | -0.46 | 1.36 | 21.25 |
| 49.33 | 8.08 | 0.42 | 0.52 | -0.47 | 1.36 | 21.21 |
| 49.35 | 7.94 | 0.42 | 0.52 | -0.47 | 1.36 | 21.17 |
| 49.37 | 7.85 | 0.42 | 0.52 | -0.47 | 1.36 | 21.14 |
| 49.38 | 7.93 | 0.42 | 0.52 | -0.47 | 1.36 | 21.10 |
| 49.40 | 7.87 | 0.42 | 0.52 | -0.47 | 1.36 | 21.07 |
| 49.42 | 7.74 | 0.41 | 0.51 | -0.47 | 1.36 | 21.03 |
| 49.43 | 7.81 | 0.42 | 0.51 | -0.47 | 1.36 | 20.99 |
| 49.45 | 7.90 | 0.42 | 0.51 | -0.47 | 1.36 | 20.95 |
| 49.47 | 7.91 | 0.41 | 0.50 | -0.47 | 1.36 | 20.92 |
| 49.48 | 7.90 | 0.41 | 0.50 | -0.47 | 1.36 | 20.89 |
| 49.50 | 7.90 | 0.41 | 0.50 | -0.48 | 1.36 | 20.86 |
| 49.52 | 7.88 | 0.41 | 0.50 | -0.48 | 1.36 | 20.82 |
| 49.53 | 7.77 | 0.41 | 0.49 | -0.47 | 1.36 | 20.77 |
| 49.55 | 7.64 | 0.41 | 0.49 | -0.48 | 1.36 | 20.74 |
| 49.57 | 7.68 | 0.41 | 0.49 | -0.48 | 1.36 | 20.70 |
| 49.58 | 7.77 | 0.40 | 0.49 | -0.48 | 1.36 | 20.66 |
| 49.60 | 7.76 | 0.40 | 0.49 | -0.48 | 1.36 | 20.62 |
| 49.62 | 7.84 | 0.40 | 0.48 | -0.48 | 1.36 | 20.58 |
| 49.63 | 7.94 | 0.40 | 0.48 | -0.48 | 1.36 | 20.56 |
| 49.65 | 7.99 | 0.40 | 0.48 | -0.48 | 1.36 | 20.53 |
| 49.67 | 7.96 | 0.40 | 0.48 | -0.49 | 1.36 | 20.49 |
| 49.68 | 7.90 | 0.40 | 0.48 | -0.49 | 1.36 | 20.45 |
| 49.70 | 7.81 | 0.40 | 0.47 | -0.49 | 1.36 | 20.41 |
| 49.72 | 7.79 | 0.40 | 0.47 | -0.49 | 1.36 | 20.38 |
| 49.73 | 7.82 | 0.40 | 0.47 | -0.49 | 1.36 | 20.35 |
| 49.75 | 7.81 | 0.40 | 0.46 | -0.49 | 1.36 | 20.31 |
| 49.77 | 7.81 | 0.40 | 0.46 | -0.49 | 1.36 | 20.28 |
| 49.78 | 7.87 | 0.40 | 0.46 | -0.49 | 1.36 | 20.25 |
| 49.80 | 7.93 | 0.39 | 0.46 | -0.49 | 1.36 | 20.21 |
| 49.82 | 8.01 | 0.39 | 0.46 | -0.49 | 1.36 | 20.17 |
| 49.83 | 8.08 | 0.39 | 0.45 | -0.49 | 1.36 | 20.14 |
| 49.85 | 8.04 | 0.39 | 0.45 | -0.49 | 1.36 | 20.11 |
| 49.87 | 7.99 | 0.39 | 0.45 | -0.49 | 1.36 | 20.07 |
| 49.88 | 7.99 | 0.39 | 0.45 | -0.50 | 1.36 | 20.03 |
| 49.90 | 8.02 | 0.39 | 0.44 | -0.50 | 1.36 | 20.00 |
| 49.92 | 8.05 | 0.39 | 0.44 | -0.50 | 1.36 | 19.96 |
| 49.93 | 8.04 | 0.39 | 0.44 | -0.49 | 1.36 | 19.93 |
| 49.95 | 8.01 | 0.39 | 0.44 | -0.49 | 1.36 | 19.90 |
| 49.97 | 8.02 | 0.39 | 0.43 | -0.50 | 1.36 | 19.87 |
| 49.98 | 7.93 | 0.39 | 0.43 | -0.50 | 1.36 | 19.84 |
| 50.00 | 7.82 | 0.39 | 0.43 | -0.50 | 1.36 | 19.80 |





|       |      |      |      |       |      |       |
|-------|------|------|------|-------|------|-------|
| 50.02 | 7.93 | 0.38 | 0.43 | -0.50 | 1.36 | 19.77 |
| 50.03 | 8.10 | 0.38 | 0.43 | -0.50 | 1.36 | 19.74 |
| 50.05 | 8.01 | 0.38 | 0.42 | -0.50 | 1.36 | 19.71 |
| 50.07 | 7.76 | 0.38 | 0.42 | -0.50 | 1.36 | 19.67 |
| 50.08 | 7.73 | 0.38 | 0.42 | -0.50 | 1.36 | 19.63 |
| 50.10 | 7.87 | 0.38 | 0.42 | -0.51 | 1.36 | 19.60 |
| 50.12 | 7.90 | 0.38 | 0.42 | -0.51 | 1.36 | 19.57 |
| 50.13 | 7.99 | 0.38 | 0.41 | -0.51 | 1.36 | 19.53 |
| 50.15 | 8.07 | 0.38 | 0.41 | -0.51 | 1.36 | 19.50 |
| 50.17 | 8.05 | 0.38 | 0.41 | -0.51 | 1.36 | 19.47 |
| 50.18 | 8.05 | 0.38 | 0.41 | -0.51 | 1.36 | 19.44 |
| 50.20 | 8.01 | 0.37 | 0.40 | -0.51 | 1.36 | 19.40 |
| 50.22 | 7.88 | 0.38 | 0.40 | -0.51 | 1.36 | 19.36 |
| 50.23 | 7.84 | 0.38 | 0.40 | -0.51 | 1.36 | 19.33 |
| 50.25 | 7.84 | 0.38 | 0.40 | -0.51 | 1.36 | 19.30 |
| 50.27 | 7.82 | 0.38 | 0.40 | -0.51 | 1.36 | 19.27 |
| 50.28 | 7.82 | 0.38 | 0.39 | -0.51 | 1.36 | 19.23 |
| 50.30 | 7.85 | 0.38 | 0.39 | -0.51 | 1.36 | 19.20 |
| 50.32 | 7.82 | 0.38 | 0.39 | -0.51 | 1.36 | 19.17 |
| 50.33 | 7.88 | 0.37 | 0.39 | -0.51 | 1.36 | 19.14 |
| 50.35 | 7.98 | 0.38 | 0.39 | -0.51 | 1.36 | 19.11 |
| 50.37 | 7.91 | 0.38 | 0.38 | -0.52 | 1.36 | 19.09 |
| 50.38 | 7.77 | 0.37 | 0.38 | -0.52 | 1.36 | 19.05 |
| 50.40 | 7.67 | 0.37 | 0.38 | -0.52 | 1.36 | 19.03 |
| 50.42 | 7.73 | 0.37 | 0.38 | -0.52 | 1.36 | 18.99 |
| 50.43 | 7.88 | 0.37 | 0.38 | -0.52 | 1.36 | 18.96 |
| 50.45 | 7.93 | 0.37 | 0.37 | -0.52 | 1.36 | 18.93 |
| 50.47 | 7.85 | 0.37 | 0.37 | -0.52 | 1.36 | 18.89 |
| 50.48 | 7.79 | 0.37 | 0.37 | -0.52 | 1.36 | 18.85 |
| 50.50 | 7.82 | 0.37 | 0.37 | -0.52 | 1.36 | 18.82 |
| 50.52 | 7.90 | 0.37 | 0.37 | -0.52 | 1.36 | 18.79 |
| 50.53 | 7.94 | 0.37 | 0.37 | -0.52 | 1.36 | 18.76 |
| 50.55 | 8.02 | 0.37 | 0.37 | -0.52 | 1.36 | 18.74 |
| 50.57 | 8.04 | 0.37 | 0.36 | -0.52 | 1.36 | 18.71 |
| 50.58 | 7.93 | 0.37 | 0.36 | -0.52 | 1.36 | 18.67 |
| 50.60 | 7.77 | 0.37 | 0.36 | -0.53 | 1.36 | 18.64 |
| 50.62 | 7.74 | 0.37 | 0.36 | -0.53 | 1.36 | 18.61 |
| 50.63 | 7.73 | 0.37 | 0.36 | -0.53 | 1.36 | 18.58 |
| 50.65 | 7.62 | 0.37 | 0.35 | -0.53 | 1.36 | 18.55 |
| 50.67 | 7.60 | 0.37 | 0.35 | -0.53 | 1.36 | 18.51 |
| 50.68 | 7.60 | 0.37 | 0.35 | -0.53 | 1.36 | 18.48 |
| 50.70 | 7.67 | 0.37 | 0.35 | -0.53 | 1.36 | 18.44 |
| 50.72 | 7.81 | 0.37 | 0.35 | -0.53 | 1.36 | 18.41 |
| 50.73 | 7.84 | 0.37 | 0.35 | -0.53 | 1.36 | 18.39 |
| 50.75 | 7.82 | 0.36 | 0.34 | -0.53 | 1.36 | 18.37 |
| 50.77 | 7.88 | 0.36 | 0.34 | -0.53 | 1.36 | 18.34 |
| 50.78 | 7.94 | 0.36 | 0.34 | -0.53 | 1.36 | 18.30 |
| 50.80 | 7.99 | 0.36 | 0.34 | -0.53 | 1.36 | 18.26 |
| 50.82 | 7.99 | 0.36 | 0.33 | -0.53 | 1.36 | 18.23 |
| 50.83 | 7.96 | 0.36 | 0.33 | -0.54 | 1.36 | 18.21 |
| 50.85 | 8.02 | 0.37 | 0.33 | -0.54 | 1.36 | 18.18 |
| 50.87 | 8.04 | 0.36 | 0.33 | -0.54 | 1.36 | 18.15 |
| 50.88 | 7.85 | 0.36 | 0.33 | -0.54 | 1.36 | 18.11 |
| 50.90 | 7.79 | 0.36 | 0.33 | -0.54 | 1.36 | 18.08 |
| 50.92 | 7.96 | 0.36 | 0.33 | -0.54 | 1.36 | 18.05 |
| 50.93 | 7.99 | 0.36 | 0.32 | -0.54 | 1.36 | 18.03 |
| 50.95 | 7.87 | 0.36 | 0.32 | -0.54 | 1.36 | 18.00 |
| 50.97 | 7.76 | 0.36 | 0.32 | -0.54 | 1.36 | 17.97 |
| 50.98 | 7.81 | 0.36 | 0.32 | -0.54 | 1.36 | 17.94 |
| 51.00 | 7.94 | 0.36 | 0.32 | -0.54 | 1.36 | 17.91 |
| 51.02 | 7.99 | 0.36 | 0.32 | -0.55 | 1.36 | 17.88 |
| 51.03 | 7.91 | 0.36 | 0.31 | -0.54 | 1.36 | 17.85 |
| 51.05 | 7.93 | 0.36 | 0.31 | -0.54 | 1.36 | 17.82 |
| 51.07 | 8.01 | 0.36 | 0.31 | -0.55 | 1.36 | 17.78 |
| 51.08 | 8.02 | 0.36 | 0.31 | -0.55 | 1.36 | 17.76 |
| 51.10 | 8.01 | 0.35 | 0.31 | -0.55 | 1.36 | 17.73 |
| 51.12 | 7.93 | 0.35 | 0.31 | -0.55 | 1.36 | 17.71 |
| 51.13 | 7.88 | 0.36 | 0.31 | -0.55 | 1.36 | 17.68 |
| 51.15 | 7.81 | 0.36 | 0.31 | -0.55 | 1.36 | 17.65 |



|       |      |      |      |       |      |       |
|-------|------|------|------|-------|------|-------|
| 51.17 | 7.64 | 0.36 | 0.30 | -0.55 | 1.36 | 17.62 |
| 51.18 | 7.56 | 0.36 | 0.30 | -0.55 | 1.36 | 17.59 |
| 51.20 | 7.56 | 0.36 | 0.30 | -0.55 | 1.36 | 17.56 |
| 51.22 | 7.60 | 0.36 | 0.30 | -0.55 | 1.36 | 17.54 |
| 51.23 | 7.68 | 0.35 | 0.30 | -0.55 | 1.36 | 17.51 |
| 51.25 | 7.59 | 0.35 | 0.30 | -0.55 | 1.36 | 17.48 |
| 51.27 | 7.60 | 0.35 | 0.30 | -0.56 | 1.36 | 17.45 |
| 51.28 | 7.90 | 0.35 | 0.29 | -0.55 | 1.36 | 17.42 |
| 51.30 | 8.13 | 0.36 | 0.29 | -0.55 | 1.36 | 17.39 |
| 51.32 | 7.99 | 0.36 | 0.29 | -0.55 | 1.36 | 17.36 |
| 51.33 | 7.81 | 0.35 | 0.29 | -0.55 | 1.36 | 17.33 |
| 51.35 | 7.90 | 0.35 | 0.29 | -0.55 | 1.36 | 17.31 |
| 51.37 | 7.93 | 0.36 | 0.29 | -0.56 | 1.36 | 17.28 |
| 51.38 | 7.87 | 0.36 | 0.28 | -0.56 | 1.36 | 17.25 |
| 51.40 | 7.79 | 0.35 | 0.28 | -0.56 | 1.36 | 17.22 |
| 51.42 | 7.74 | 0.35 | 0.28 | -0.56 | 1.36 | 17.19 |
| 51.43 | 7.79 | 0.35 | 0.28 | -0.56 | 1.36 | 17.15 |
| 51.45 | 7.84 | 0.35 | 0.28 | -0.56 | 1.36 | 17.13 |
| 51.47 | 7.87 | 0.35 | 0.28 | -0.56 | 1.36 | 17.11 |
| 51.48 | 7.88 | 0.35 | 0.28 | -0.56 | 1.36 | 17.09 |
| 51.50 | 7.85 | 0.35 | 0.28 | -0.56 | 1.36 | 17.06 |
| 51.52 | 7.88 | 0.35 | 0.28 | -0.55 | 1.36 | 17.03 |
| 51.53 | 7.96 | 0.35 | 0.28 | -0.55 | 1.36 | 17.00 |
| 51.55 | 7.96 | 0.35 | 0.28 | -0.56 | 1.36 | 16.98 |
| 51.57 | 7.93 | 0.35 | 0.27 | -0.56 | 1.36 | 16.96 |
| 51.58 | 7.90 | 0.35 | 0.27 | -0.56 | 1.36 | 16.92 |
| 51.60 | 7.96 | 0.35 | 0.27 | -0.56 | 1.36 | 16.88 |
| 51.62 | 7.93 | 0.35 | 0.27 | -0.55 | 1.36 | 16.86 |
| 51.63 | 7.74 | 0.35 | 0.27 | -0.55 | 1.36 | 16.83 |
| 51.65 | 7.71 | 0.35 | 0.27 | -0.55 | 1.36 | 16.81 |
| 51.67 | 7.70 | 0.35 | 0.27 | -0.56 | 1.36 | 16.79 |
| 51.68 | 7.62 | 0.35 | 0.26 | -0.56 | 1.36 | 16.76 |
| 51.70 | 7.70 | 0.35 | 0.26 | -0.56 | 1.36 | 16.72 |
| 51.72 | 7.84 | 0.35 | 0.26 | -0.56 | 1.36 | 16.69 |
| 51.73 | 7.88 | 0.35 | 0.26 | -0.56 | 1.36 | 16.66 |
| 51.75 | 7.93 | 0.35 | 0.26 | -0.56 | 1.36 | 16.64 |
| 51.77 | 7.96 | 0.35 | 0.26 | -0.56 | 1.36 | 16.62 |
| 51.78 | 7.90 | 0.35 | 0.26 | -0.56 | 1.36 | 16.59 |
| 51.80 | 7.96 | 0.35 | 0.26 | -0.56 | 1.36 | 16.56 |
| 51.82 | 8.07 | 0.35 | 0.26 | -0.56 | 1.36 | 16.53 |
| 51.83 | 8.04 | 0.35 | 0.25 | -0.56 | 1.36 | 16.51 |
| 51.85 | 7.96 | 0.35 | 0.25 | -0.56 | 1.36 | 16.48 |
| 51.87 | 7.90 | 0.35 | 0.25 | -0.56 | 1.36 | 16.46 |
| 51.88 | 7.85 | 0.35 | 0.25 | -0.56 | 1.36 | 16.43 |
| 51.90 | 7.87 | 0.35 | 0.25 | -0.56 | 1.36 | 16.40 |
| 51.92 | 7.85 | 0.35 | 0.25 | -0.56 | 1.36 | 16.37 |
| 51.93 | 7.79 | 0.35 | 0.25 | -0.56 | 1.36 | 16.34 |
| 51.95 | 7.70 | 0.35 | 0.25 | -0.56 | 1.36 | 16.33 |
| 51.97 | 7.65 | 0.35 | 0.25 | -0.56 | 1.36 | 16.31 |
| 51.98 | 7.70 | 0.35 | 0.25 | -0.56 | 1.36 | 16.28 |
| 52.00 | 7.77 | 0.35 | 0.25 | -0.56 | 1.36 | 16.24 |
| 52.02 | 7.85 | 0.35 | 0.24 | -0.56 | 1.36 | 16.21 |
| 52.03 | 7.94 | 0.35 | 0.24 | -0.56 | 1.36 | 16.19 |
| 52.05 | 7.82 | 0.35 | 0.24 | -0.56 | 1.36 | 16.16 |
| 52.07 | 7.73 | 0.35 | 0.24 | -0.56 | 1.36 | 16.14 |
| 52.08 | 7.77 | 0.35 | 0.24 | -0.56 | 1.36 | 16.11 |
| 52.10 | 7.81 | 0.35 | 0.24 | -0.57 | 1.36 | 16.08 |
| 52.12 | 7.77 | 0.35 | 0.24 | -0.56 | 1.36 | 16.06 |
| 52.13 | 7.76 | 0.35 | 0.24 | -0.56 | 1.36 | 16.04 |
| 52.15 | 7.84 | 0.35 | 0.24 | -0.56 | 1.36 | 16.01 |
| 52.17 | 7.82 | 0.35 | 0.24 | -0.57 | 1.36 | 15.98 |
| 52.18 | 7.87 | 0.35 | 0.24 | -0.56 | 1.36 | 15.96 |
| 52.20 | 8.07 | 0.35 | 0.23 | -0.57 | 1.36 | 15.93 |
| 52.22 | 8.02 | 0.35 | 0.23 | -0.57 | 1.36 | 15.90 |
| 52.23 | 7.84 | 0.35 | 0.23 | -0.56 | 1.36 | 15.88 |
| 52.25 | 7.77 | 0.35 | 0.23 | -0.56 | 1.36 | 15.86 |
| 52.27 | 7.70 | 0.35 | 0.23 | -0.57 | 1.36 | 15.83 |
| 52.28 | 7.68 | 0.35 | 0.23 | -0.57 | 1.36 | 15.80 |
| 52.30 | 7.84 | 0.35 | 0.23 | -0.57 | 1.36 | 15.77 |



|       |      |      |      |       |      |       |
|-------|------|------|------|-------|------|-------|
| 52.32 | 7.85 | 0.35 | 0.23 | -0.57 | 1.36 | 15.75 |
| 52.33 | 7.77 | 0.35 | 0.23 | -0.56 | 1.36 | 15.72 |
| 52.35 | 7.88 | 0.35 | 0.23 | -0.56 | 1.36 | 15.69 |
| 52.37 | 7.96 | 0.35 | 0.23 | -0.57 | 1.36 | 15.67 |
| 52.38 | 7.91 | 0.35 | 0.23 | -0.57 | 1.36 | 15.65 |
| 52.40 | 7.85 | 0.35 | 0.22 | -0.57 | 1.36 | 15.62 |
| 52.42 | 7.91 | 0.35 | 0.22 | -0.57 | 1.36 | 15.60 |
| 52.43 | 7.94 | 0.36 | 0.22 | -0.57 | 1.36 | 15.57 |
| 52.45 | 7.87 | 0.35 | 0.22 | -0.57 | 1.36 | 15.54 |
| 52.47 | 7.73 | 0.35 | 0.22 | -0.57 | 1.36 | 15.51 |
| 52.48 | 7.73 | 0.35 | 0.22 | -0.57 | 1.36 | 15.48 |
| 52.50 | 7.98 | 0.35 | 0.22 | -0.57 | 1.36 | 15.47 |
| 52.52 | 8.10 | 0.35 | 0.22 | -0.57 | 1.36 | 15.44 |
| 52.53 | 7.88 | 0.35 | 0.22 | -0.57 | 1.36 | 15.41 |
| 52.55 | 7.77 | 0.35 | 0.22 | -0.57 | 1.36 | 15.39 |
| 52.57 | 8.01 | 0.35 | 0.22 | -0.57 | 1.36 | 15.36 |
| 52.58 | 8.15 | 0.35 | 0.22 | -0.57 | 1.36 | 15.34 |
| 52.60 | 8.04 | 0.35 | 0.22 | -0.57 | 1.36 | 15.32 |
| 52.62 | 7.84 | 0.35 | 0.22 | -0.57 | 1.36 | 15.29 |
| 52.63 | 7.76 | 0.35 | 0.21 | -0.57 | 1.36 | 15.27 |
| 52.65 | 7.82 | 0.35 | 0.21 | -0.57 | 1.36 | 15.25 |
| 52.67 | 7.91 | 0.35 | 0.21 | -0.57 | 1.36 | 15.23 |
| 52.68 | 7.91 | 0.35 | 0.21 | -0.57 | 1.36 | 15.19 |
| 52.70 | 7.93 | 0.35 | 0.21 | -0.57 | 1.36 | 15.16 |
| 52.72 | 7.98 | 0.35 | 0.21 | -0.57 | 1.36 | 15.14 |
| 52.73 | 7.96 | 0.35 | 0.21 | -0.57 | 1.36 | 15.12 |
| 52.75 | 7.87 | 0.36 | 0.21 | -0.57 | 1.36 | 15.10 |
| 52.77 | 7.84 | 0.36 | 0.21 | -0.57 | 1.36 | 15.08 |
| 52.78 | 7.90 | 0.36 | 0.21 | -0.57 | 1.36 | 15.06 |
| 52.80 | 7.98 | 0.35 | 0.21 | -0.57 | 1.36 | 15.03 |
| 52.82 | 7.93 | 0.36 | 0.21 | -0.57 | 1.36 | 15.00 |
| 52.83 | 7.85 | 0.36 | 0.21 | -0.57 | 1.36 | 14.97 |
| 52.85 | 7.96 | 0.36 | 0.21 | -0.57 | 1.36 | 14.95 |
| 52.87 | 8.10 | 0.36 | 0.21 | -0.57 | 1.36 | 14.93 |
| 52.88 | 8.10 | 0.36 | 0.21 | -0.57 | 1.36 | 14.90 |
| 52.90 | 8.05 | 0.36 | 0.21 | -0.57 | 1.36 | 14.89 |
| 52.92 | 7.93 | 0.36 | 0.20 | -0.57 | 1.36 | 14.87 |
| 52.93 | 7.79 | 0.36 | 0.20 | -0.58 | 1.36 | 14.84 |
| 52.95 | 7.77 | 0.36 | 0.20 | -0.58 | 1.36 | 14.82 |
| 52.97 | 7.88 | 0.36 | 0.20 | -0.57 | 1.36 | 14.79 |
| 52.98 | 7.98 | 0.36 | 0.20 | -0.57 | 1.36 | 14.77 |
| 53.00 | 7.91 | 0.36 | 0.20 | -0.57 | 1.36 | 14.75 |
| 53.02 | 7.91 | 0.36 | 0.20 | -0.57 | 1.36 | 14.72 |
| 53.03 | 7.93 | 0.36 | 0.20 | -0.57 | 1.36 | 14.69 |
| 53.05 | 7.90 | 0.36 | 0.20 | -0.57 | 1.36 | 14.67 |
| 53.07 | 7.96 | 0.36 | 0.20 | -0.57 | 1.36 | 14.65 |
| 53.08 | 7.94 | 0.36 | 0.20 | -0.57 | 1.36 | 14.63 |
| 53.10 | 7.91 | 0.36 | 0.20 | -0.57 | 1.36 | 14.61 |
| 53.12 | 7.94 | 0.36 | 0.20 | -0.58 | 1.36 | 14.58 |
| 53.13 | 7.91 | 0.36 | 0.19 | -0.58 | 1.36 | 14.55 |
| 53.15 | 7.90 | 0.36 | 0.19 | -0.58 | 1.36 | 14.53 |
| 53.17 | 7.82 | 0.36 | 0.19 | -0.58 | 1.36 | 14.51 |
| 53.18 | 7.79 | 0.37 | 0.19 | -0.58 | 1.36 | 14.49 |
| 53.20 | 7.88 | 0.37 | 0.19 | -0.58 | 1.36 | 14.47 |
| 53.22 | 7.98 | 0.37 | 0.19 | -0.58 | 1.36 | 14.45 |
| 53.23 | 8.01 | 0.37 | 0.19 | -0.58 | 1.36 | 14.42 |
| 53.25 | 7.88 | 0.37 | 0.19 | -0.58 | 1.36 | 14.39 |
| 53.27 | 7.84 | 0.37 | 0.19 | -0.58 | 1.36 | 14.36 |
| 53.28 | 7.96 | 0.37 | 0.19 | -0.58 | 1.36 | 14.34 |
| 53.30 | 8.04 | 0.37 | 0.19 | -0.58 | 1.36 | 14.33 |
| 53.32 | 7.94 | 0.37 | 0.19 | -0.58 | 1.36 | 14.31 |
| 53.33 | 7.94 | 0.37 | 0.19 | -0.58 | 1.36 | 14.29 |
| 53.35 | 7.91 | 0.37 | 0.19 | -0.58 | 1.36 | 14.27 |
| 53.37 | 7.81 | 0.37 | 0.19 | -0.58 | 1.36 | 14.25 |
| 53.38 | 7.87 | 0.37 | 0.19 | -0.58 | 1.36 | 14.22 |
| 53.40 | 8.04 | 0.37 | 0.19 | -0.58 | 1.36 | 14.19 |
| 53.42 | 8.02 | 0.38 | 0.19 | -0.58 | 1.36 | 14.17 |
| 53.43 | 7.98 | 0.38 | 0.19 | -0.58 | 1.36 | 14.15 |
| 53.45 | 8.02 | 0.38 | 0.18 | -0.58 | 1.36 | 14.12 |



|       |      |      |      |       |      |       |
|-------|------|------|------|-------|------|-------|
| 53.47 | 8.13 | 0.38 | 0.18 | -0.58 | 1.36 | 14.10 |
| 53.48 | 8.19 | 0.38 | 0.18 | -0.58 | 1.36 | 14.08 |
| 53.50 | 8.15 | 0.38 | 0.18 | -0.58 | 1.36 | 14.06 |
| 53.52 | 8.01 | 0.38 | 0.18 | -0.58 | 1.36 | 14.04 |
| 53.53 | 7.98 | 0.38 | 0.18 | -0.58 | 1.36 | 14.02 |
| 53.55 | 7.99 | 0.38 | 0.18 | -0.59 | 1.36 | 14.00 |
| 53.57 | 8.01 | 0.38 | 0.18 | -0.59 | 1.36 | 13.97 |
| 53.58 | 8.04 | 0.38 | 0.18 | -0.58 | 1.36 | 13.94 |
| 53.60 | 8.07 | 0.38 | 0.18 | -0.58 | 1.36 | 13.92 |
| 53.62 | 7.96 | 0.38 | 0.18 | -0.58 | 1.36 | 13.90 |
| 53.63 | 7.76 | 0.38 | 0.18 | -0.58 | 1.36 | 13.88 |
| 53.65 | 7.82 | 0.38 | 0.18 | -0.58 | 1.36 | 13.86 |
| 53.67 | 7.99 | 0.38 | 0.18 | -0.58 | 1.36 | 13.83 |
| 53.68 | 8.05 | 0.38 | 0.18 | -0.58 | 1.36 | 13.81 |
| 53.70 | 8.05 | 0.38 | 0.18 | -0.58 | 1.36 | 13.79 |
| 53.72 | 7.94 | 0.39 | 0.17 | -0.58 | 1.36 | 13.78 |
| 53.73 | 7.94 | 0.39 | 0.17 | -0.58 | 1.36 | 13.75 |
| 53.75 | 8.01 | 0.39 | 0.17 | -0.58 | 1.36 | 13.73 |
| 53.77 | 8.04 | 0.39 | 0.18 | -0.58 | 1.36 | 13.71 |
| 53.78 | 8.01 | 0.39 | 0.18 | -0.58 | 1.36 | 13.69 |
| 53.80 | 7.91 | 0.39 | 0.17 | -0.58 | 1.36 | 13.66 |
| 53.82 | 7.87 | 0.39 | 0.17 | -0.58 | 1.36 | 13.64 |
| 53.83 | 7.94 | 0.39 | 0.17 | -0.59 | 1.36 | 13.62 |
| 53.85 | 7.96 | 0.39 | 0.17 | -0.59 | 1.36 | 13.59 |
| 53.87 | 7.90 | 0.39 | 0.17 | -0.59 | 1.36 | 13.58 |
| 53.88 | 7.82 | 0.40 | 0.17 | -0.59 | 1.36 | 13.56 |
| 53.90 | 7.71 | 0.39 | 0.17 | -0.58 | 1.36 | 13.54 |
| 53.92 | 7.73 | 0.39 | 0.17 | -0.59 | 1.36 | 13.52 |
| 53.93 | 7.93 | 0.39 | 0.17 | -0.59 | 1.36 | 13.50 |
| 53.95 | 8.07 | 0.39 | 0.17 | -0.58 | 1.36 | 13.47 |
| 53.97 | 8.02 | 0.39 | 0.17 | -0.58 | 1.36 | 13.45 |
| 53.98 | 7.88 | 0.39 | 0.17 | -0.58 | 1.36 | 13.43 |
| 54.00 | 7.94 | 0.39 | 0.17 | -0.58 | 1.36 | 13.41 |
| 54.02 | 8.02 | 0.39 | 0.16 | -0.58 | 1.36 | 13.39 |
| 54.03 | 7.93 | 0.39 | 0.16 | -0.58 | 1.36 | 13.37 |
| 54.05 | 7.91 | 0.39 | 0.17 | -0.58 | 1.36 | 13.36 |
| 54.07 | 7.96 | 0.39 | 0.16 | -0.59 | 1.36 | 13.34 |
| 54.08 | 7.93 | 0.40 | 0.16 | -0.59 | 1.36 | 13.31 |
| 54.10 | 7.88 | 0.40 | 0.16 | -0.59 | 1.36 | 13.29 |
| 54.12 | 7.87 | 0.40 | 0.16 | -0.59 | 1.36 | 13.27 |
| 54.13 | 7.88 | 0.39 | 0.16 | -0.59 | 1.36 | 13.25 |
| 54.15 | 8.02 | 0.39 | 0.16 | -0.59 | 1.36 | 13.23 |
| 54.17 | 8.10 | 0.39 | 0.16 | -0.59 | 1.36 | 13.20 |
| 54.18 | 8.02 | 0.40 | 0.16 | -0.59 | 1.36 | 13.17 |
| 54.20 | 7.98 | 0.40 | 0.16 | -0.59 | 1.36 | 13.15 |
| 54.22 | 7.93 | 0.39 | 0.16 | -0.59 | 1.36 | 13.13 |
| 54.23 | 7.93 | 0.39 | 0.16 | -0.59 | 1.36 | 13.11 |
| 54.25 | 7.90 | 0.39 | 0.16 | -0.59 | 1.36 | 13.10 |
| 54.27 | 7.91 | 0.39 | 0.16 | -0.59 | 1.36 | 13.08 |
| 54.28 | 7.90 | 0.40 | 0.16 | -0.59 | 1.36 | 13.06 |
| 54.30 | 7.79 | 0.40 | 0.16 | -0.59 | 1.36 | 13.04 |
| 54.32 | 7.77 | 0.40 | 0.16 | -0.59 | 1.36 | 13.02 |
| 54.33 | 7.79 | 0.39 | 0.16 | -0.59 | 1.36 | 13.00 |
| 54.35 | 7.77 | 0.39 | 0.16 | -0.59 | 1.36 | 12.98 |
| 54.37 | 7.71 | 0.39 | 0.16 | -0.59 | 1.36 | 12.95 |
| 54.38 | 7.64 | 0.39 | 0.16 | -0.59 | 1.36 | 12.93 |
| 54.40 | 7.68 | 0.39 | 0.16 | -0.59 | 1.36 | 12.92 |
| 54.42 | 7.81 | 0.39 | 0.16 | -0.59 | 1.36 | 12.90 |
| 54.43 | 7.93 | 0.39 | 0.16 | -0.59 | 1.36 | 12.87 |
| 54.45 | 7.90 | 0.39 | 0.16 | -0.59 | 1.36 | 12.85 |
| 54.47 | 7.85 | 0.39 | 0.16 | -0.59 | 1.36 | 12.84 |
| 54.48 | 7.81 | 0.39 | 0.16 | -0.59 | 1.36 | 12.82 |
| 54.50 | 7.74 | 0.39 | 0.16 | -0.59 | 1.36 | 12.80 |
| 54.52 | 7.77 | 0.39 | 0.15 | -0.59 | 1.36 | 12.77 |
| 54.53 | 7.74 | 0.39 | 0.15 | -0.59 | 1.36 | 12.75 |
| 54.55 | 7.71 | 0.39 | 0.15 | -0.59 | 1.36 | 12.73 |
| 54.57 | 7.77 | 0.39 | 0.15 | -0.59 | 1.36 | 12.72 |
| 54.58 | 7.87 | 0.39 | 0.15 | -0.59 | 1.36 | 12.70 |
| 54.60 | 7.99 | 0.38 | 0.16 | -0.58 | 1.36 | 12.68 |



|       |      |      |      |       |      |       |
|-------|------|------|------|-------|------|-------|
| 54.62 | 8.07 | 0.39 | 0.16 | -0.59 | 1.36 | 12.66 |
| 54.63 | 7.94 | 0.39 | 0.16 | -0.59 | 1.36 | 12.64 |
| 54.65 | 7.84 | 0.38 | 0.16 | -0.59 | 1.36 | 12.62 |
| 54.67 | 7.99 | 0.38 | 0.15 | -0.58 | 1.36 | 12.61 |
| 54.68 | 8.01 | 0.38 | 0.15 | -0.58 | 1.36 | 12.58 |
| 54.70 | 7.85 | 0.38 | 0.15 | -0.58 | 1.36 | 12.56 |
| 54.72 | 7.76 | 0.39 | 0.15 | -0.58 | 1.36 | 12.53 |
| 54.73 | 7.73 | 0.39 | 0.15 | -0.59 | 1.36 | 12.52 |
| 54.75 | 7.73 | 0.38 | 0.15 | -0.59 | 1.36 | 12.50 |
| 54.77 | 7.77 | 0.38 | 0.15 | -0.59 | 1.36 | 12.47 |
| 54.78 | 7.87 | 0.37 | 0.15 | -0.59 | 1.36 | 12.45 |
| 54.80 | 7.81 | 0.37 | 0.15 | -0.59 | 1.36 | 12.43 |
| 54.82 | 7.71 | 0.38 | 0.15 | -0.59 | 1.36 | 12.41 |
| 54.83 | 7.65 | 0.38 | 0.15 | -0.59 | 1.36 | 12.39 |
| 54.85 | 7.68 | 0.38 | 0.15 | -0.59 | 1.36 | 12.37 |
| 54.87 | 7.71 | 0.38 | 0.15 | -0.58 | 1.36 | 12.36 |
| 54.88 | 7.76 | 0.37 | 0.15 | -0.58 | 1.36 | 12.34 |
| 54.90 | 7.81 | 0.37 | 0.15 | -0.58 | 1.36 | 12.32 |
| 54.92 | 7.91 | 0.37 | 0.15 | -0.58 | 1.36 | 12.30 |
| 54.93 | 7.90 | 0.37 | 0.15 | -0.58 | 1.36 | 12.29 |
| 54.95 | 7.73 | 0.37 | 0.15 | -0.58 | 1.36 | 12.27 |
| 54.97 | 7.65 | 0.37 | 0.15 | -0.58 | 1.36 | 12.24 |
| 54.98 | 7.62 | 0.37 | 0.15 | -0.58 | 1.36 | 12.22 |
| 55.00 | 7.64 | 0.36 | 0.15 | -0.58 | 1.36 | 12.20 |
| 55.02 | 7.64 | 0.37 | 0.15 | -0.59 | 1.36 | 12.19 |
| 55.03 | 7.62 | 0.37 | 0.15 | -0.58 | 1.36 | 12.17 |
| 55.05 | 7.67 | 0.36 | 0.15 | -0.58 | 1.36 | 12.15 |
| 55.07 | 7.65 | 0.36 | 0.15 | -0.59 | 1.36 | 12.12 |
| 55.08 | 7.50 | 0.36 | 0.15 | -0.58 | 1.36 | 12.10 |
| 55.10 | 7.31 | 0.36 | 0.15 | -0.58 | 1.36 | 12.08 |
| 55.12 | 7.30 | 0.36 | 0.15 | -0.58 | 1.36 | 12.06 |
| 55.13 | 7.48 | 0.36 | 0.15 | -0.58 | 1.36 | 12.05 |
| 55.15 | 7.60 | 0.36 | 0.15 | -0.58 | 1.36 | 12.03 |
| 55.17 | 7.60 | 0.36 | 0.15 | -0.58 | 1.36 | 12.01 |
| 55.18 | 7.74 | 0.36 | 0.15 | -0.58 | 1.36 | 11.99 |
| 55.20 | 7.81 | 0.36 | 0.14 | -0.58 | 1.36 | 11.97 |
| 55.22 | 7.82 | 0.35 | 0.15 | -0.58 | 1.36 | 11.95 |
| 55.23 | 7.84 | 0.35 | 0.15 | -0.58 | 1.36 | 11.94 |
| 55.25 | 7.76 | 0.35 | 0.15 | -0.58 | 1.36 | 11.92 |
| 55.27 | 7.70 | 0.35 | 0.15 | -0.58 | 1.36 | 11.91 |
| 55.28 | 7.73 | 0.35 | 0.15 | -0.58 | 1.36 | 11.89 |
| 55.30 | 7.71 | 0.35 | 0.14 | -0.58 | 1.36 | 11.86 |
| 55.32 | 7.74 | 0.35 | 0.14 | -0.58 | 1.36 | 11.84 |
| 55.33 | 7.81 | 0.35 | 0.14 | -0.58 | 1.36 | 11.82 |
| 55.35 | 7.76 | 0.35 | 0.14 | -0.58 | 1.36 | 11.81 |
| 55.37 | 7.68 | 0.35 | 0.14 | -0.58 | 1.36 | 11.79 |
| 55.38 | 7.70 | 0.35 | 0.14 | -0.58 | 1.36 | 11.77 |
| 55.40 | 7.77 | 0.34 | 0.14 | -0.58 | 1.36 | 11.75 |
| 55.42 | 7.81 | 0.34 | 0.14 | -0.58 | 1.36 | 11.73 |
| 55.43 | 7.87 | 0.34 | 0.14 | -0.58 | 1.36 | 11.71 |
| 55.45 | 7.88 | 0.34 | 0.14 | -0.58 | 1.36 | 11.70 |
| 55.47 | 7.85 | 0.35 | 0.14 | -0.58 | 1.36 | 11.68 |
| 55.48 | 7.81 | 0.34 | 0.14 | -0.58 | 1.36 | 11.66 |
| 55.50 | 7.74 | 0.34 | 0.14 | -0.58 | 1.36 | 11.64 |
| 55.52 | 7.68 | 0.34 | 0.14 | -0.58 | 1.36 | 11.62 |
| 55.53 | 7.62 | 0.34 | 0.14 | -0.58 | 1.36 | 11.60 |
| 55.55 | 7.67 | 0.34 | 0.14 | -0.58 | 1.36 | 11.59 |
| 55.57 | 7.71 | 0.34 | 0.14 | -0.58 | 1.36 | 11.57 |
| 55.58 | 7.67 | 0.34 | 0.14 | -0.58 | 1.36 | 11.55 |
| 55.60 | 7.71 | 0.34 | 0.14 | -0.58 | 1.36 | 11.54 |
| 55.62 | 7.81 | 0.34 | 0.14 | -0.58 | 1.36 | 11.52 |
| 55.63 | 7.79 | 0.34 | 0.14 | -0.58 | 1.36 | 11.50 |
| 55.65 | 7.74 | 0.34 | 0.14 | -0.58 | 1.36 | 11.48 |
| 55.67 | 7.68 | 0.34 | 0.14 | -0.58 | 1.36 | 11.47 |
| 55.68 | 7.71 | 0.34 | 0.14 | -0.58 | 1.36 | 11.45 |
| 55.70 | 7.67 | 0.34 | 0.14 | -0.58 | 1.36 | 11.43 |
| 55.72 | 7.50 | 0.34 | 0.14 | -0.58 | 1.36 | 11.41 |
| 55.73 | 7.59 | 0.34 | 0.14 | -0.58 | 1.36 | 11.39 |
| 55.75 | 7.76 | 0.34 | 0.14 | -0.58 | 1.36 | 11.37 |



|       |      |      |      |       |      |       |
|-------|------|------|------|-------|------|-------|
| 55.77 | 7.77 | 0.33 | 0.14 | -0.58 | 1.36 | 11.36 |
| 55.78 | 7.71 | 0.33 | 0.14 | -0.58 | 1.36 | 11.35 |
| 55.80 | 7.76 | 0.34 | 0.14 | -0.58 | 1.36 | 11.32 |
| 55.82 | 7.73 | 0.34 | 0.14 | -0.58 | 1.36 | 11.30 |
| 55.83 | 7.54 | 0.33 | 0.14 | -0.58 | 1.36 | 11.29 |
| 55.85 | 7.45 | 0.34 | 0.14 | -0.58 | 1.36 | 11.27 |
| 55.87 | 7.54 | 0.34 | 0.14 | -0.57 | 1.36 | 11.25 |
| 55.88 | 7.65 | 0.34 | 0.14 | -0.57 | 1.36 | 11.23 |
| 55.90 | 7.65 | 0.34 | 0.14 | -0.58 | 1.36 | 11.22 |
| 55.92 | 7.60 | 0.34 | 0.14 | -0.58 | 1.36 | 11.20 |
| 55.93 | 7.56 | 0.34 | 0.13 | -0.57 | 1.36 | 11.18 |
| 55.95 | 7.64 | 0.34 | 0.14 | -0.57 | 1.36 | 11.16 |
| 55.97 | 7.62 | 0.33 | 0.14 | -0.57 | 1.36 | 11.14 |
| 55.98 | 7.65 | 0.33 | 0.13 | -0.57 | 1.36 | 11.13 |
| 56.00 | 7.85 | 0.33 | 0.13 | -0.57 | 1.36 | 11.11 |
| 56.02 | 7.90 | 0.33 | 0.14 | -0.57 | 1.36 | 11.10 |
| 56.03 | 7.84 | 0.33 | 0.14 | -0.57 | 1.36 | 11.08 |
| 56.05 | 7.79 | 0.33 | 0.14 | -0.57 | 1.36 | 11.06 |
| 56.07 | 7.73 | 0.33 | 0.14 | -0.57 | 1.36 | 11.04 |
| 56.08 | 7.70 | 0.33 | 0.14 | -0.57 | 1.36 | 11.03 |
| 56.10 | 7.70 | 0.33 | 0.14 | -0.57 | 1.36 | 11.01 |
| 56.12 | 7.64 | 0.33 | 0.13 | -0.57 | 1.36 | 11.00 |
| 56.13 | 7.59 | 0.33 | 0.13 | -0.57 | 1.36 | 10.98 |
| 56.15 | 7.59 | 0.33 | 0.13 | -0.57 | 1.36 | 10.96 |
| 56.17 | 7.62 | 0.33 | 0.13 | -0.57 | 1.36 | 10.95 |
| 56.18 | 7.77 | 0.33 | 0.13 | -0.57 | 1.36 | 10.93 |
| 56.20 | 7.87 | 0.33 | 0.13 | -0.57 | 1.36 | 10.91 |
| 56.22 | 7.82 | 0.34 | 0.14 | -0.57 | 1.36 | 10.90 |
| 56.23 | 7.74 | 0.34 | 0.14 | -0.57 | 1.36 | 10.89 |
| 56.25 | 7.73 | 0.34 | 0.14 | -0.56 | 1.36 | 10.87 |
| 56.27 | 7.74 | 0.33 | 0.13 | -0.57 | 1.36 | 10.85 |
| 56.28 | 7.74 | 0.33 | 0.13 | -0.57 | 1.36 | 10.84 |
| 56.30 | 7.74 | 0.33 | 0.13 | -0.56 | 1.36 | 10.81 |
| 56.32 | 7.74 | 0.34 | 0.13 | -0.56 | 1.36 | 10.79 |
| 56.33 | 7.81 | 0.34 | 0.13 | -0.57 | 1.36 | 10.77 |
| 56.35 | 7.81 | 0.33 | 0.13 | -0.57 | 1.36 | 10.76 |
| 56.37 | 7.74 | 0.34 | 0.13 | -0.56 | 1.36 | 10.75 |
| 56.38 | 7.73 | 0.33 | 0.13 | -0.56 | 1.36 | 10.73 |
| 56.40 | 7.81 | 0.33 | 0.13 | -0.56 | 1.36 | 10.71 |
| 56.42 | 7.91 | 0.33 | 0.13 | -0.56 | 1.36 | 10.70 |
| 56.43 | 7.96 | 0.34 | 0.13 | -0.56 | 1.36 | 10.69 |
| 56.45 | 7.93 | 0.33 | 0.13 | -0.57 | 1.36 | 10.66 |
| 56.47 | 7.94 | 0.33 | 0.13 | -0.57 | 1.36 | 10.64 |
| 56.48 | 8.01 | 0.33 | 0.13 | -0.56 | 1.36 | 10.63 |
| 56.50 | 8.01 | 0.33 | 0.14 | -0.56 | 1.36 | 10.61 |
| 56.52 | 7.96 | 0.33 | 0.14 | -0.57 | 1.36 | 10.59 |
| 56.53 | 7.93 | 0.34 | 0.13 | -0.56 | 1.36 | 10.58 |
| 56.55 | 7.99 | 0.34 | 0.13 | -0.56 | 1.36 | 10.57 |
| 56.57 | 8.04 | 0.34 | 0.13 | -0.56 | 1.36 | 10.55 |
| 56.58 | 7.90 | 0.34 | 0.13 | -0.56 | 1.36 | 10.53 |
| 56.60 | 7.70 | 0.34 | 0.13 | -0.56 | 1.36 | 10.51 |
| 56.62 | 7.68 | 0.34 | 0.13 | -0.57 | 1.36 | 10.49 |
| 56.63 | 7.76 | 0.34 | 0.13 | -0.56 | 1.36 | 10.48 |
| 56.65 | 7.82 | 0.34 | 0.13 | -0.56 | 1.36 | 10.47 |
| 56.67 | 7.87 | 0.34 | 0.13 | -0.56 | 1.36 | 10.45 |
| 56.68 | 7.91 | 0.34 | 0.13 | -0.56 | 1.36 | 10.43 |
| 56.70 | 7.93 | 0.33 | 0.13 | -0.56 | 1.36 | 10.42 |
| 56.72 | 7.91 | 0.33 | 0.13 | -0.56 | 1.36 | 10.40 |
| 56.73 | 7.93 | 0.34 | 0.13 | -0.56 | 1.36 | 10.38 |
| 56.75 | 7.98 | 0.34 | 0.13 | -0.56 | 1.36 | 10.36 |
| 56.77 | 7.98 | 0.34 | 0.13 | -0.56 | 1.36 | 10.35 |
| 56.78 | 8.04 | 0.34 | 0.13 | -0.56 | 1.36 | 10.33 |
| 56.80 | 8.01 | 0.34 | 0.13 | -0.56 | 1.36 | 10.32 |
| 56.82 | 7.84 | 0.34 | 0.13 | -0.56 | 1.36 | 10.30 |
| 56.83 | 7.82 | 0.34 | 0.13 | -0.56 | 1.36 | 10.28 |
| 56.85 | 8.01 | 0.34 | 0.13 | -0.56 | 1.36 | 10.27 |
| 56.87 | 8.05 | 0.34 | 0.13 | -0.56 | 1.36 | 10.25 |
| 56.88 | 7.94 | 0.34 | 0.13 | -0.56 | 1.36 | 10.24 |
| 56.90 | 7.91 | 0.34 | 0.13 | -0.56 | 1.36 | 10.23 |



|       |      |      |      |       |      |       |
|-------|------|------|------|-------|------|-------|
| 56.92 | 7.94 | 0.33 | 0.13 | -0.56 | 1.36 | 10.22 |
| 56.93 | 7.93 | 0.33 | 0.13 | -0.56 | 1.36 | 10.20 |
| 56.95 | 7.90 | 0.33 | 0.13 | -0.56 | 1.36 | 10.17 |
| 56.97 | 7.94 | 0.34 | 0.13 | -0.56 | 1.36 | 10.15 |
| 56.98 | 7.94 | 0.34 | 0.13 | -0.55 | 1.36 | 10.14 |
| 57.00 | 7.91 | 0.34 | 0.13 | -0.55 | 1.36 | 10.12 |
| 57.02 | 7.84 | 0.34 | 0.13 | -0.55 | 1.36 | 10.11 |
| 57.03 | 7.84 | 0.33 | 0.13 | -0.55 | 1.36 | 10.09 |
| 57.05 | 7.94 | 0.33 | 0.13 | -0.55 | 1.36 | 10.07 |
| 57.07 | 7.96 | 0.33 | 0.13 | -0.55 | 1.36 | 10.06 |
| 57.08 | 8.02 | 0.33 | 0.14 | -0.55 | 1.36 | 10.05 |
| 57.10 | 8.10 | 0.34 | 0.13 | -0.55 | 1.36 | 10.04 |
| 57.12 | 8.07 | 0.34 | 0.14 | -0.55 | 1.36 | 10.01 |
| 57.13 | 7.91 | 0.33 | 0.14 | -0.55 | 1.36 | 10.00 |
| 57.15 | 7.98 | 0.33 | 0.14 | -0.55 | 1.36 | 9.98  |
| 57.17 | 8.05 | 0.33 | 0.14 | -0.55 | 1.36 | 9.97  |
| 57.18 | 7.96 | 0.34 | 0.13 | -0.55 | 1.36 | 9.95  |
| 57.20 | 7.94 | 0.34 | 0.13 | -0.55 | 1.36 | 9.94  |
| 57.22 | 8.05 | 0.34 | 0.14 | -0.55 | 1.36 | 9.92  |
| 57.23 | 8.04 | 0.33 | 0.14 | -0.54 | 1.36 | 9.90  |
| 57.25 | 7.84 | 0.33 | 0.13 | -0.54 | 1.36 | 9.89  |
| 57.27 | 7.82 | 0.33 | 0.13 | -0.54 | 1.36 | 9.87  |
| 57.28 | 7.99 | 0.33 | 0.14 | -0.54 | 1.36 | 9.86  |
| 57.30 | 7.96 | 0.34 | 0.14 | -0.54 | 1.36 | 9.85  |
| 57.32 | 7.90 | 0.34 | 0.14 | -0.54 | 1.36 | 9.83  |
| 57.33 | 7.91 | 0.34 | 0.14 | -0.54 | 1.36 | 9.81  |
| 57.35 | 7.98 | 0.34 | 0.14 | -0.54 | 1.36 | 9.80  |
| 57.37 | 8.04 | 0.33 | 0.14 | -0.54 | 1.36 | 9.79  |
| 57.38 | 7.99 | 0.34 | 0.14 | -0.54 | 1.36 | 9.77  |
| 57.40 | 7.93 | 0.34 | 0.14 | -0.54 | 1.36 | 9.75  |
| 57.42 | 7.93 | 0.33 | 0.14 | -0.54 | 1.36 | 9.74  |
| 57.43 | 7.91 | 0.33 | 0.14 | -0.53 | 1.36 | 9.72  |
| 57.45 | 8.04 | 0.33 | 0.14 | -0.53 | 1.36 | 9.70  |
| 57.47 | 8.11 | 0.33 | 0.14 | -0.53 | 1.36 | 9.68  |
| 57.48 | 8.02 | 0.33 | 0.14 | -0.52 | 1.36 | 9.67  |
| 57.50 | 8.05 | 0.33 | 0.14 | -0.52 | 1.36 | 9.66  |
| 57.52 | 8.22 | 0.33 | 0.14 | -0.52 | 1.36 | 9.64  |
| 57.53 | 8.19 | 0.33 | 0.14 | -0.51 | 1.36 | 9.62  |
| 57.55 | 8.08 | 0.33 | 0.14 | -0.51 | 1.36 | 9.61  |
| 57.57 | 8.05 | 0.33 | 0.14 | -0.51 | 1.36 | 9.60  |
| 57.58 | 8.08 | 0.33 | 0.14 | -0.50 | 1.36 | 9.58  |
| 57.60 | 8.05 | 0.33 | 0.14 | -0.50 | 1.36 | 9.57  |
| 57.62 | 7.94 | 0.33 | 0.14 | -0.50 | 1.36 | 9.55  |
| 57.63 | 7.81 | 0.33 | 0.14 | -0.50 | 1.36 | 9.52  |
| 57.65 | 7.79 | 0.33 | 0.14 | -0.50 | 1.36 | 9.51  |
| 57.67 | 7.87 | 0.33 | 0.14 | -0.50 | 1.36 | 9.50  |
| 57.68 | 7.91 | 0.33 | 0.14 | -0.49 | 1.36 | 9.49  |
| 57.70 | 7.91 | 0.33 | 0.14 | -0.48 | 1.36 | 9.47  |
| 57.72 | 7.84 | 0.33 | 0.14 | -0.48 | 1.36 | 9.45  |
| 57.73 | 7.79 | 0.33 | 0.14 | -0.48 | 1.36 | 9.43  |
| 57.75 | 7.84 | 0.33 | 0.14 | -0.48 | 1.36 | 9.43  |
| 57.77 | 7.79 | 0.33 | 0.14 | -0.47 | 1.36 | 9.41  |
| 57.78 | 7.67 | 0.33 | 0.14 | -0.47 | 1.36 | 9.39  |
| 57.80 | 7.79 | 0.33 | 0.14 | -0.47 | 1.36 | 9.38  |
| 57.82 | 7.94 | 0.33 | 0.14 | -0.46 | 1.36 | 9.37  |
| 57.83 | 7.96 | 0.33 | 0.14 | -0.46 | 1.36 | 9.35  |
| 57.85 | 7.90 | 0.33 | 0.14 | -0.46 | 1.36 | 9.33  |
| 57.87 | 7.91 | 0.33 | 0.14 | -0.45 | 1.36 | 9.32  |
| 57.88 | 7.99 | 0.33 | 0.14 | -0.45 | 1.36 | 9.31  |
| 57.90 | 7.99 | 0.33 | 0.14 | -0.45 | 1.36 | 9.29  |
| 57.92 | 7.96 | 0.33 | 0.14 | -0.45 | 1.36 | 9.27  |
| 57.93 | 7.90 | 0.33 | 0.15 | -0.44 | 1.36 | 9.26  |
| 57.95 | 7.79 | 0.32 | 0.15 | -0.44 | 1.36 | 9.24  |
| 57.97 | 7.76 | 0.32 | 0.15 | -0.44 | 1.36 | 9.22  |
| 57.98 | 7.81 | 0.32 | 0.15 | -0.43 | 1.36 | 9.20  |
| 58.00 | 7.76 | 0.33 | 0.15 | -0.43 | 1.36 | 9.19  |
| 58.02 | 7.71 | 0.33 | 0.14 | -0.43 | 1.36 | 9.17  |
| 58.03 | 7.74 | 0.33 | 0.15 | -0.42 | 1.36 | 9.16  |
| 58.05 | 7.71 | 0.33 | 0.15 | -0.42 | 1.36 | 9.15  |



|       |      |      |      |       |      |      |
|-------|------|------|------|-------|------|------|
| 58.07 | 7.70 | 0.32 | 0.15 | -0.42 | 1.36 | 9.13 |
| 58.08 | 7.81 | 0.32 | 0.15 | -0.42 | 1.36 | 9.12 |
| 58.10 | 7.84 | 0.32 | 0.15 | -0.41 | 1.36 | 9.10 |
| 58.12 | 7.91 | 0.32 | 0.15 | -0.41 | 1.36 | 9.09 |
| 58.13 | 7.96 | 0.32 | 0.15 | -0.41 | 1.36 | 9.07 |
| 58.15 | 7.88 | 0.32 | 0.15 | -0.41 | 1.36 | 9.05 |
| 58.17 | 7.87 | 0.32 | 0.15 | -0.41 | 1.36 | 9.04 |
| 58.18 | 7.84 | 0.32 | 0.15 | -0.41 | 1.36 | 9.02 |
| 58.20 | 7.82 | 0.32 | 0.15 | -0.41 | 1.36 | 9.01 |
| 58.22 | 7.87 | 0.32 | 0.15 | -0.40 | 1.36 | 8.99 |
| 58.23 | 7.91 | 0.32 | 0.15 | -0.40 | 1.36 | 8.98 |
| 58.25 | 7.91 | 0.32 | 0.15 | -0.40 | 1.36 | 8.96 |
| 58.27 | 7.82 | 0.32 | 0.15 | -0.40 | 1.36 | 8.95 |
| 58.28 | 7.74 | 0.32 | 0.15 | -0.40 | 1.36 | 8.93 |
| 58.30 | 7.71 | 0.32 | 0.15 | -0.40 | 1.36 | 8.91 |
| 58.32 | 7.70 | 0.32 | 0.15 | -0.40 | 1.36 | 8.90 |
| 58.33 | 7.87 | 0.32 | 0.15 | -0.40 | 1.36 | 8.89 |
| 58.35 | 8.04 | 0.32 | 0.15 | -0.40 | 1.36 | 8.87 |
| 58.37 | 8.01 | 0.31 | 0.15 | -0.40 | 1.36 | 8.85 |
| 58.38 | 7.93 | 0.32 | 0.15 | -0.40 | 1.36 | 8.84 |
| 58.40 | 7.91 | 0.32 | 0.15 | -0.39 | 1.36 | 8.82 |
| 58.42 | 7.85 | 0.32 | 0.15 | -0.40 | 1.36 | 8.82 |
| 58.43 | 7.84 | 0.32 | 0.15 | -0.40 | 1.36 | 8.81 |
| 58.45 | 7.93 | 0.32 | 0.15 | -0.40 | 1.36 | 8.79 |
| 58.47 | 7.96 | 0.32 | 0.15 | -0.40 | 1.36 | 8.78 |
| 58.48 | 7.91 | 0.32 | 0.15 | -0.40 | 1.36 | 8.76 |
| 58.50 | 7.91 | 0.32 | 0.15 | -0.40 | 1.36 | 8.74 |
| 58.52 | 7.90 | 0.32 | 0.15 | -0.40 | 1.36 | 8.72 |
| 58.53 | 7.85 | 0.32 | 0.15 | -0.40 | 1.36 | 8.71 |
| 58.55 | 7.76 | 0.32 | 0.15 | -0.40 | 1.36 | 8.70 |
| 58.57 | 7.71 | 0.32 | 0.15 | -0.41 | 1.36 | 8.69 |
| 58.58 | 7.74 | 0.32 | 0.15 | -0.41 | 1.36 | 8.68 |
| 58.60 | 7.73 | 0.32 | 0.15 | -0.40 | 1.36 | 8.66 |
| 58.62 | 7.76 | 0.32 | 0.15 | -0.41 | 1.36 | 8.64 |
| 58.63 | 7.82 | 0.32 | 0.15 | -0.41 | 1.36 | 8.63 |
| 58.65 | 7.84 | 0.32 | 0.15 | -0.41 | 1.36 | 8.62 |
| 58.67 | 7.90 | 0.32 | 0.15 | -0.41 | 1.36 | 8.61 |
| 58.68 | 7.90 | 0.32 | 0.15 | -0.41 | 1.36 | 8.59 |
| 58.70 | 7.76 | 0.32 | 0.15 | -0.42 | 1.36 | 8.57 |
| 58.72 | 7.71 | 0.32 | 0.15 | -0.42 | 1.36 | 8.56 |
| 58.73 | 7.88 | 0.31 | 0.15 | -0.42 | 1.36 | 8.55 |
| 58.75 | 7.91 | 0.31 | 0.15 | -0.42 | 1.36 | 8.53 |
| 58.77 | 7.76 | 0.31 | 0.15 | -0.42 | 1.36 | 8.51 |
| 58.78 | 7.64 | 0.31 | 0.15 | -0.43 | 1.36 | 8.50 |
| 58.80 | 7.68 | 0.31 | 0.15 | -0.43 | 1.36 | 8.49 |
| 58.82 | 7.81 | 0.31 | 0.15 | -0.43 | 1.36 | 8.48 |
| 58.83 | 7.90 | 0.31 | 0.15 | -0.44 | 1.36 | 8.46 |
| 58.85 | 7.85 | 0.31 | 0.15 | -0.44 | 1.36 | 8.44 |
| 58.87 | 7.82 | 0.31 | 0.15 | -0.44 | 1.36 | 8.43 |
| 58.88 | 7.85 | 0.31 | 0.15 | -0.44 | 1.36 | 8.42 |
| 58.90 | 7.88 | 0.31 | 0.15 | -0.44 | 1.36 | 8.40 |
| 58.92 | 7.87 | 0.31 | 0.15 | -0.45 | 1.36 | 8.39 |
| 58.93 | 7.84 | 0.31 | 0.15 | -0.45 | 1.36 | 8.38 |
| 58.95 | 7.87 | 0.31 | 0.15 | -0.46 | 1.36 | 8.37 |
| 58.97 | 7.90 | 0.31 | 0.15 | -0.46 | 1.36 | 8.35 |
| 58.98 | 7.84 | 0.31 | 0.15 | -0.46 | 1.36 | 8.34 |
| 59.00 | 7.81 | 0.31 | 0.15 | -0.46 | 1.36 | 8.33 |
| 59.02 | 7.82 | 0.31 | 0.15 | -0.46 | 1.36 | 8.31 |
| 59.03 | 7.87 | 0.31 | 0.15 | -0.47 | 1.36 | 8.30 |
| 59.05 | 7.90 | 0.31 | 0.15 | -0.47 | 1.36 | 8.28 |
| 59.07 | 7.88 | 0.32 | 0.15 | -0.47 | 1.36 | 8.27 |
| 59.08 | 7.84 | 0.32 | 0.15 | -0.47 | 1.36 | 8.26 |
| 59.10 | 7.79 | 0.31 | 0.15 | -0.48 | 1.36 | 8.24 |
| 59.12 | 7.74 | 0.31 | 0.15 | -0.48 | 1.36 | 8.23 |
| 59.13 | 7.77 | 0.31 | 0.15 | -0.48 | 1.36 | 8.22 |
| 59.15 | 7.81 | 0.31 | 0.15 | -0.49 | 1.36 | 8.21 |
| 59.17 | 7.82 | 0.31 | 0.15 | -0.49 | 1.36 | 8.19 |
| 59.18 | 7.81 | 0.31 | 0.15 | -0.49 | 1.36 | 8.17 |
| 59.20 | 7.71 | 0.31 | 0.15 | -0.49 | 1.36 | 8.16 |



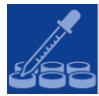

|       |      |      |      |       |      |      |
|-------|------|------|------|-------|------|------|
| 59.22 | 7.68 | 0.31 | 0.15 | -0.50 | 1.36 | 8.14 |
| 59.23 | 7.65 | 0.31 | 0.15 | -0.50 | 1.36 | 8.13 |
| 59.25 | 7.68 | 0.31 | 0.15 | -0.50 | 1.36 | 8.11 |
| 59.27 | 7.79 | 0.31 | 0.15 | -0.50 | 1.36 | 8.10 |
| 59.28 | 7.85 | 0.31 | 0.15 | -0.50 | 1.36 | 8.09 |
| 59.30 | 7.96 | 0.31 | 0.15 | -0.51 | 1.36 | 8.07 |
| 59.32 | 7.91 | 0.31 | 0.15 | -0.51 | 1.36 | 8.06 |
| 59.33 | 7.73 | 0.31 | 0.15 | -0.51 | 1.36 | 8.05 |
| 59.35 | 7.64 | 0.31 | 0.15 | -0.51 | 1.36 | 8.04 |
| 59.37 | 7.76 | 0.31 | 0.15 | -0.51 | 1.36 | 8.02 |
| 59.38 | 7.91 | 0.31 | 0.16 | -0.51 | 1.36 | 8.00 |
| 59.40 | 7.82 | 0.31 | 0.16 | -0.52 | 1.36 | 8.00 |
| 59.42 | 7.84 | 0.31 | 0.15 | -0.52 | 1.36 | 7.99 |
| 59.43 | 7.82 | 0.31 | 0.15 | -0.52 | 1.36 | 7.97 |
| 59.45 | 7.77 | 0.31 | 0.16 | -0.52 | 1.36 | 7.96 |
| 59.47 | 7.82 | 0.31 | 0.16 | -0.52 | 1.36 | 7.94 |
| 59.48 | 7.73 | 0.31 | 0.16 | -0.52 | 1.36 | 7.93 |
| 59.50 | 7.62 | 0.31 | 0.16 | -0.53 | 1.36 | 7.91 |
| 59.52 | 7.73 | 0.30 | 0.16 | -0.53 | 1.36 | 7.90 |
| 59.53 | 7.85 | 0.31 | 0.16 | -0.53 | 1.36 | 7.89 |
| 59.55 | 7.77 | 0.31 | 0.16 | -0.53 | 1.36 | 7.88 |
| 59.57 | 7.65 | 0.31 | 0.16 | -0.54 | 1.36 | 7.86 |
| 59.58 | 7.73 | 0.30 | 0.16 | -0.53 | 1.36 | 7.85 |
| 59.60 | 7.94 | 0.31 | 0.17 | -0.54 | 1.36 | 7.84 |
| 59.62 | 7.96 | 0.30 | 0.17 | -0.54 | 1.36 | 7.83 |
| 59.63 | 7.82 | 0.30 | 0.17 | -0.54 | 1.36 | 7.81 |
| 59.65 | 7.77 | 0.30 | 0.17 | -0.54 | 1.36 | 7.80 |
| 59.67 | 7.74 | 0.30 | 0.17 | -0.54 | 1.36 | 7.78 |
| 59.68 | 7.74 | 0.30 | 0.17 | -0.54 | 1.36 | 7.77 |
| 59.70 | 7.81 | 0.30 | 0.17 | -0.54 | 1.36 | 7.76 |
| 59.72 | 7.88 | 0.30 | 0.17 | -0.55 | 1.36 | 7.74 |
| 59.73 | 7.93 | 0.30 | 0.18 | -0.55 | 1.36 | 7.72 |
| 59.75 | 7.94 | 0.30 | 0.18 | -0.55 | 1.36 | 7.71 |
| 59.77 | 7.85 | 0.30 | 0.18 | -0.55 | 1.36 | 7.70 |
| 59.78 | 7.82 | 0.30 | 0.18 | -0.55 | 1.36 | 7.69 |
| 59.80 | 7.85 | 0.30 | 0.18 | -0.55 | 1.36 | 7.68 |
| 59.82 | 7.85 | 0.30 | 0.19 | -0.55 | 1.36 | 7.67 |
| 59.83 | 7.93 | 0.31 | 0.19 | -0.56 | 1.36 | 7.66 |
| 59.85 | 7.98 | 0.30 | 0.19 | -0.56 | 1.36 | 7.65 |
| 59.87 | 7.82 | 0.31 | 0.19 | -0.55 | 1.36 | 7.63 |
| 59.88 | 7.76 | 0.31 | 0.19 | -0.56 | 1.36 | 7.62 |
| 59.90 | 7.85 | 0.31 | 0.19 | -0.56 | 1.36 | 7.60 |
| 59.92 | 7.84 | 0.30 | 0.19 | -0.56 | 1.36 | 7.59 |

Supplementary Table 4: Experimental data from Figure 4C. Exosome uptake analysis in regions of interest (dose: 5 µg/ml SCy-MiExo)

| Time (min) | Exosome uptake (a.u.) |     |     |     |     |     |     |     |     |     |     |     |     |     |     |     |     |
|------------|-----------------------|-----|-----|-----|-----|-----|-----|-----|-----|-----|-----|-----|-----|-----|-----|-----|-----|
|            | 0                     | 94  | 57  | 58  | 53  | 41  | 86  | 26  | 30  | 60  |     |     |     |     |     |     |     |
| 0          | 94                    | 57  | 58  | 53  | 41  | 86  | 26  | 30  | 60  |     |     |     |     |     |     |     |     |
| 30         | 46                    | 106 | 68  | 66  | 46  | 73  | 29  | 45  |     |     |     |     |     |     |     |     |     |
| 60         | 59                    | 126 | 156 | 85  | 76  | 156 | 94  | 40  |     |     |     |     |     |     |     |     |     |
| 120        | 104                   | 179 | 135 | 169 | 157 | 119 | 96  | 51  | 136 | 66  |     |     |     |     |     |     |     |
| 240        | 113                   | 228 | 185 | 168 | 64  | 91  | 82  | 58  | 63  | 47  | 73  | 84  | 121 | 142 |     |     |     |
| 1440       | 243                   | 218 | 206 | 240 | 227 | 233 | 207 | 151 | 163 | 233 | 210 | 155 | 180 | 131 | 202 | 130 | 121 |

**Supplementary Table 5:** Experimental data from Figure 4C. Exosome uptake analysis in regions of interest (dose: 0.5  $\mu\text{g/ml}$  SCy-MiExo)

| Time (min) | Exosome uptake (a.u.) |     |     |     |     |     |     |     |     |     |    |    |
|------------|-----------------------|-----|-----|-----|-----|-----|-----|-----|-----|-----|----|----|
|            | 0                     | 40  | 49  | 38  | 9   | 12  | 10  | 21  | 8   |     |    |    |
| 30         | 115                   | 41  | 47  | 52  | 16  | 31  | 31  | 33  | 39  | 138 | 73 | 33 |
| 60         | 75                    | 170 | 105 | 68  | 90  | 60  | 53  | 77  | 28  | 67  | 40 |    |
| 120        | 126                   | 96  | 70  | 115 | 63  | 72  | 42  | 83  | 53  | 66  |    |    |
| 240        | 194                   | 175 | 136 | 134 | 106 | 118 | 139 | 118 | 141 | 101 |    |    |
| 1440       | 130                   | 107 | 121 | 93  | 62  | 63  | 45  | 89  | 136 | 109 | 81 | 46 |

**Supplementary Table 6:** Experimental data from Figure 5B. In vivo average radiant efficiency (%), measured in livers from mice treated with SCy-MiExo

| Time (h) | Avg. Radiant efficiency (%) |          |          |
|----------|-----------------------------|----------|----------|
| 1        | 88.36324                    | 69.16803 | 83.84992 |
| 4        | 91.02773                    | 84.71996 | 100      |
| 24       | 93.14845                    | 87.16694 | 98.09679 |
